# Supplementary material
Source: PubMed Central journal article supplement (PMC8274565)

# **Photocatalytic acyl azolium-promoted alkoxy carbonylation of trifluoroborates**

Joshua L. Zhu<sup>†</sup> and Karl A. Scheidt<sup>\*†</sup>

<sup>†</sup>Department of Chemistry, Northwestern University, Evanston, IL 60208 (USA)

## **Supporting Information**

### **Table of Contents**

|                            |    |
|----------------------------|----|
| Table of Contents .....    | S1 |
| List of Compounds .....    | S2 |
| Selected NMR Spectra ..... | S5 |

## List of Compounds

## Potassium Trifluoroborates

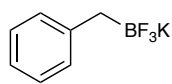

3a

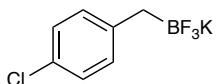

3b

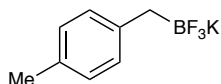

3c

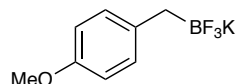

3d

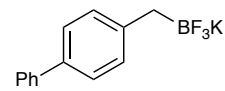

3e

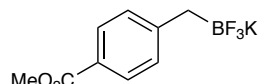

3f

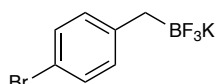

3g

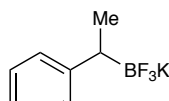

3h

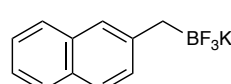

3i

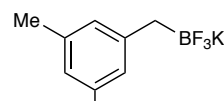

3j

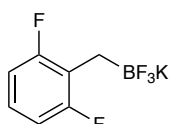

3k

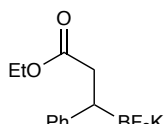

3l

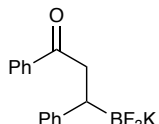

3m

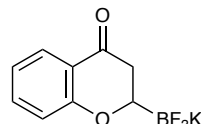

3n

## Imidazole Esters

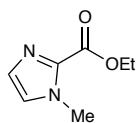

5a

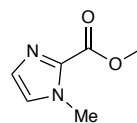

5b

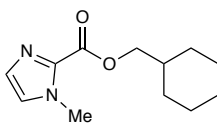

5c

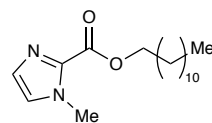

5d

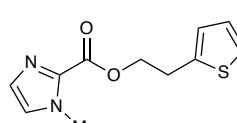

5e

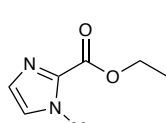

5f

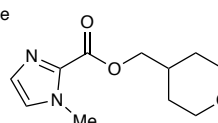

5g

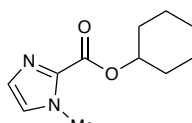

5h

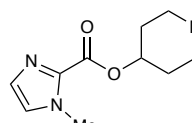

5i

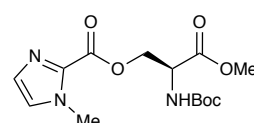

5j

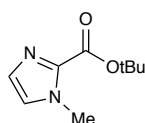

5k

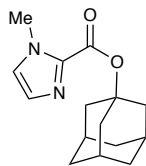

5l

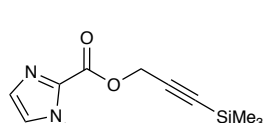

5m

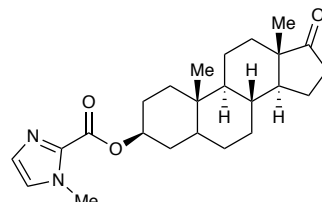

5n

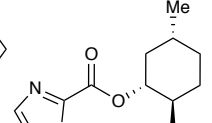

5o

## Dimethylimidazolium Esters

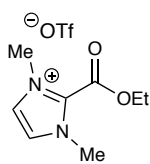

1a

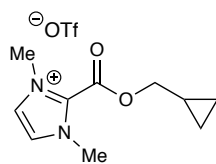

1b

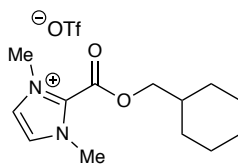

1c

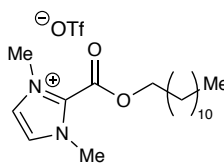

1d

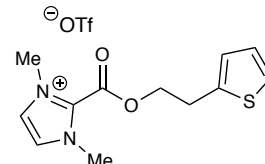

1e

## Supporting Information

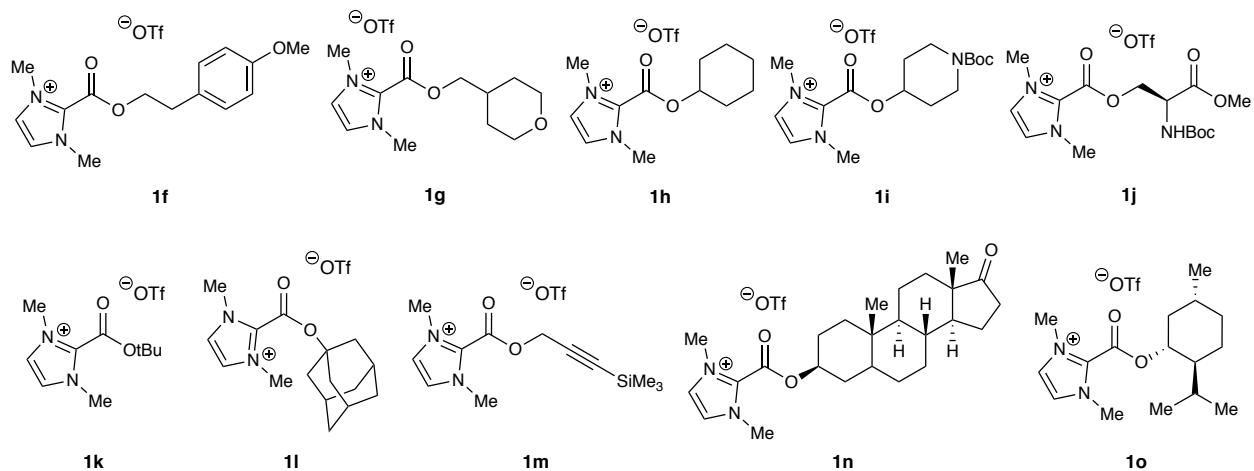

## Products

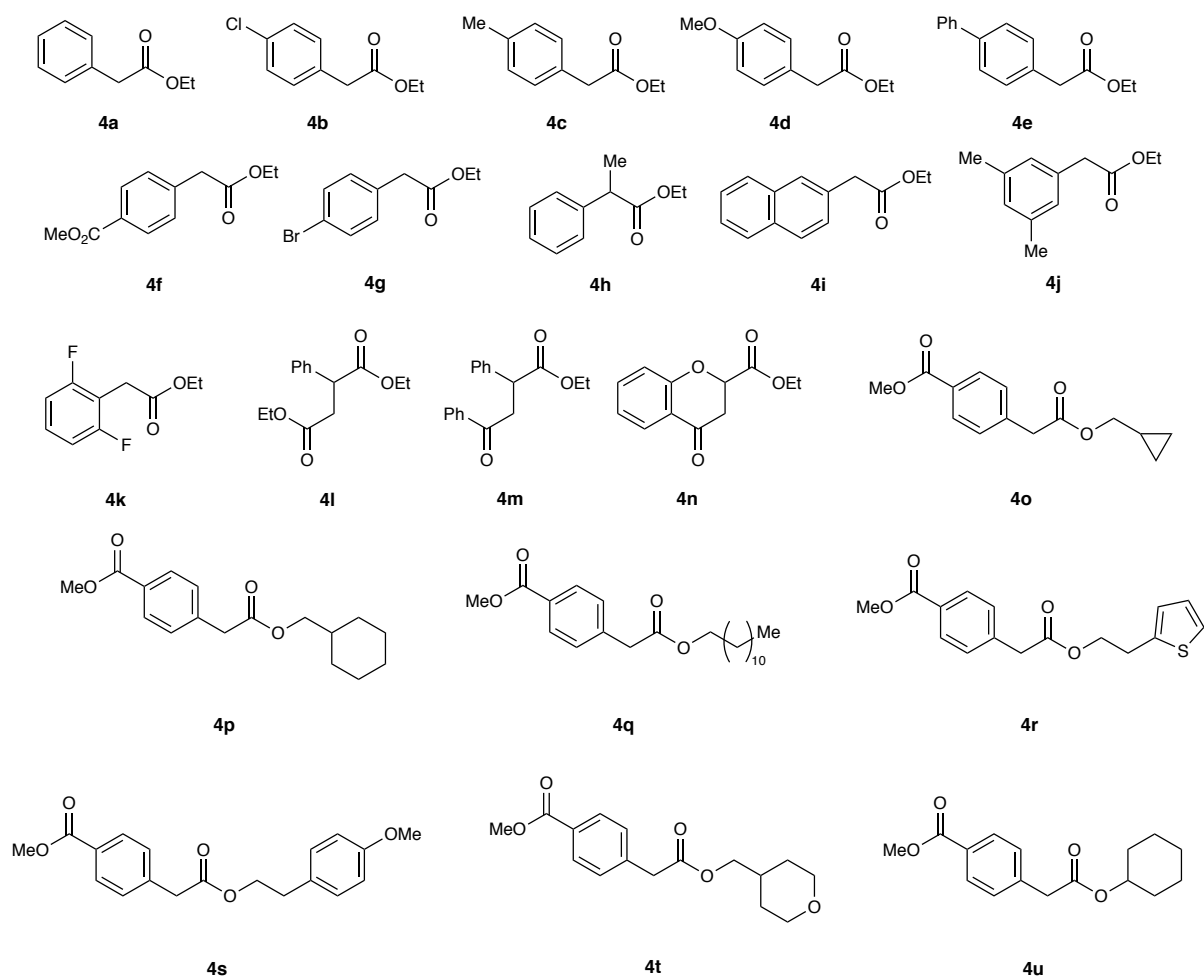

## Supporting Information

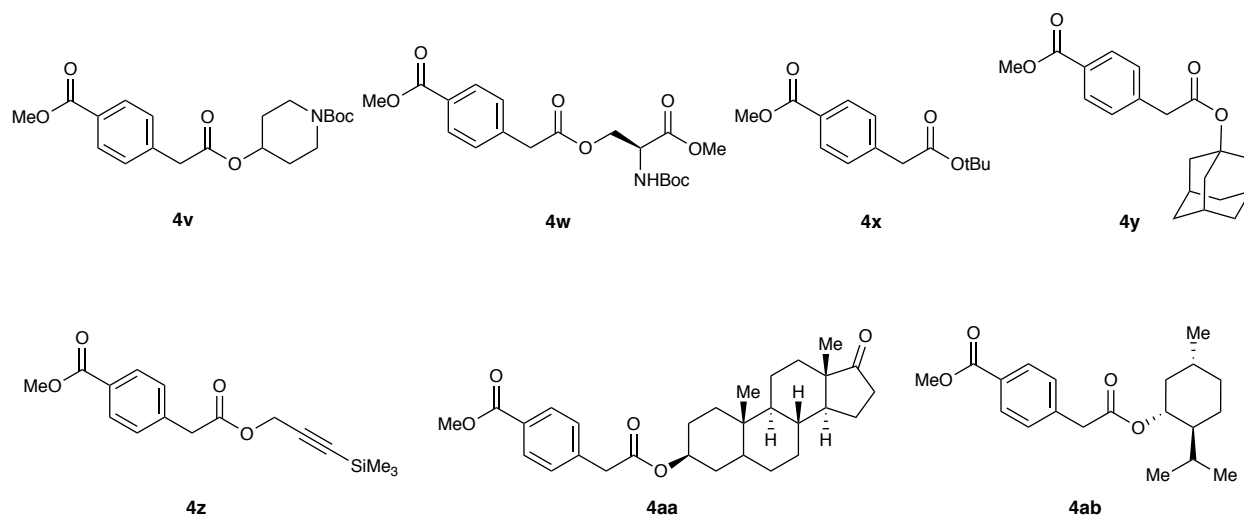

Other

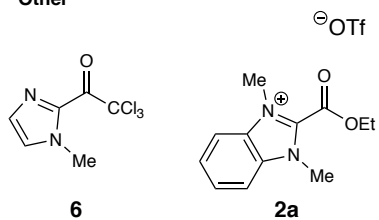

Supporting Information

Selected NMR Spectra

$^1\text{H}$  NMR of **3k**

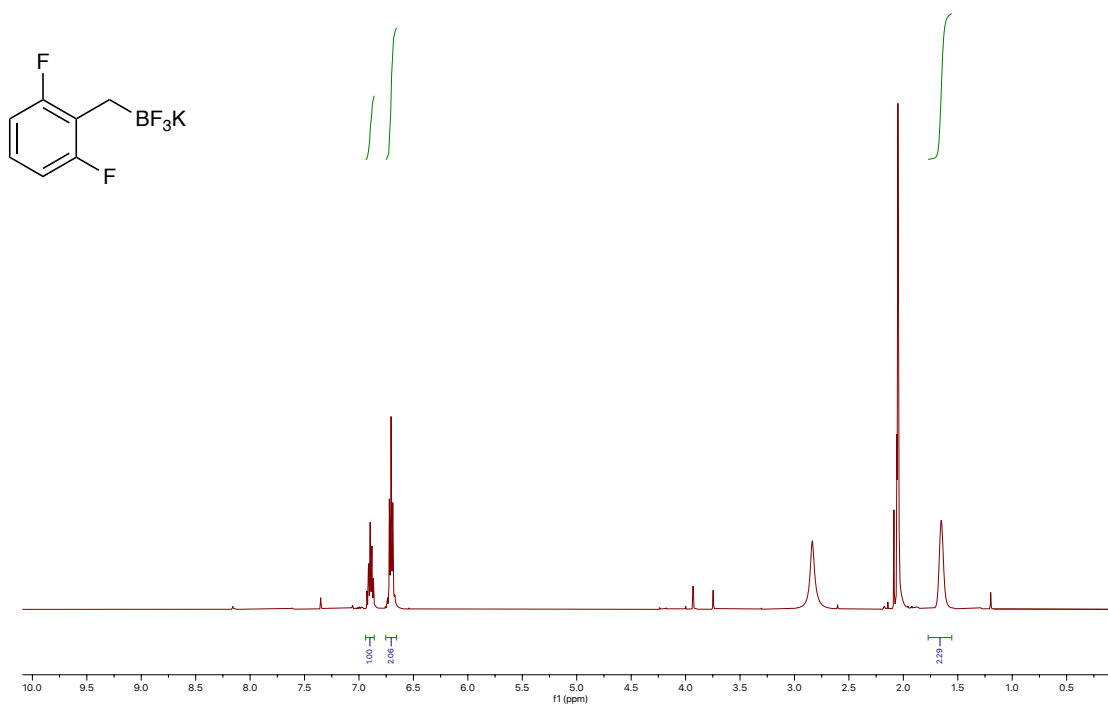

$^{13}\text{C}$  NMR of **3k**

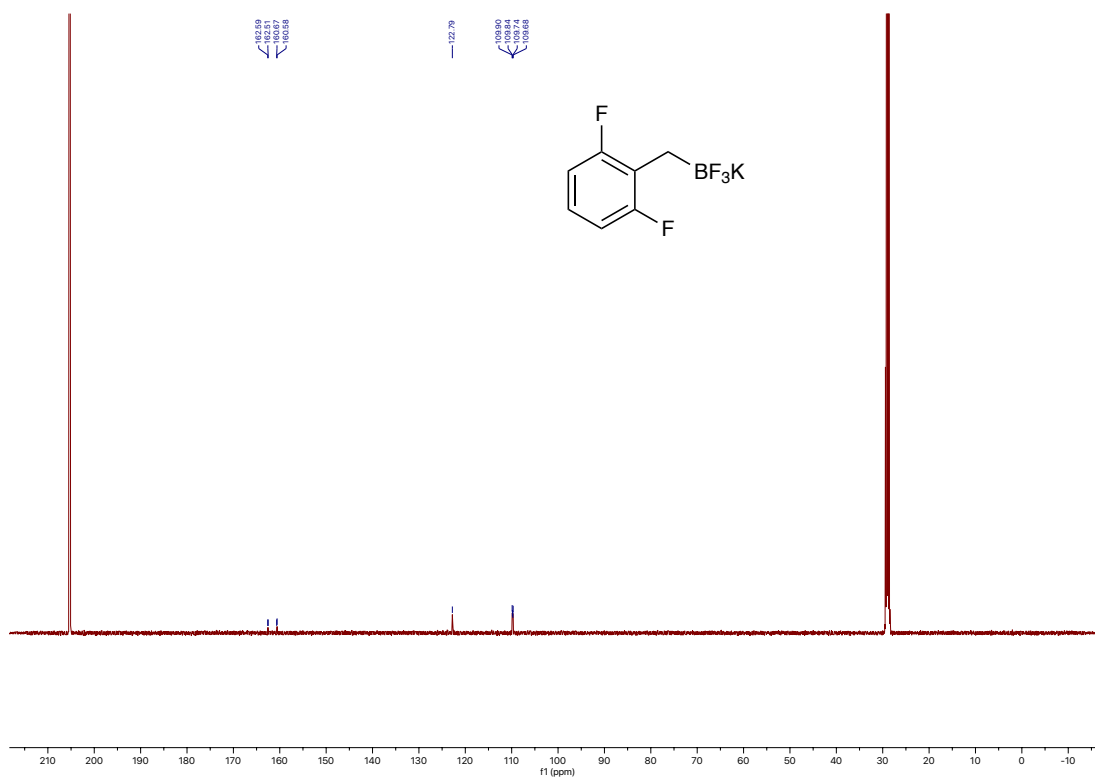

Supporting Information

$^{19}\text{F}$  NMR of **3k**

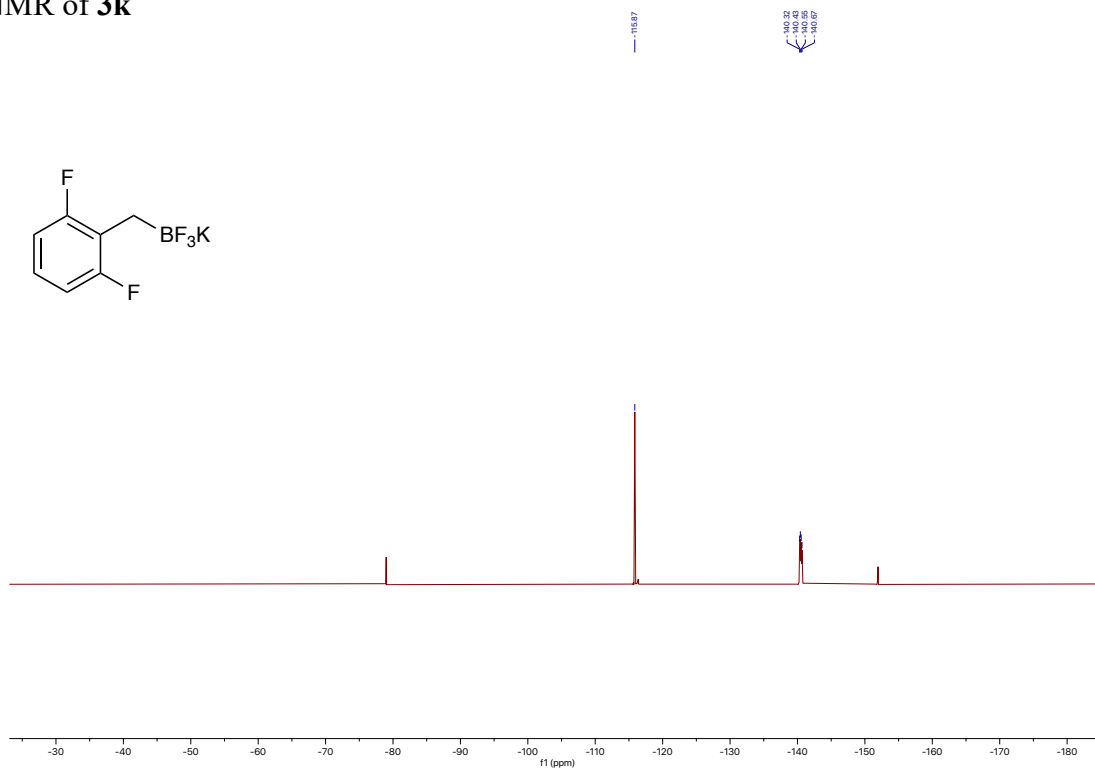

$^{11}\text{B}$  NMR of **3k**

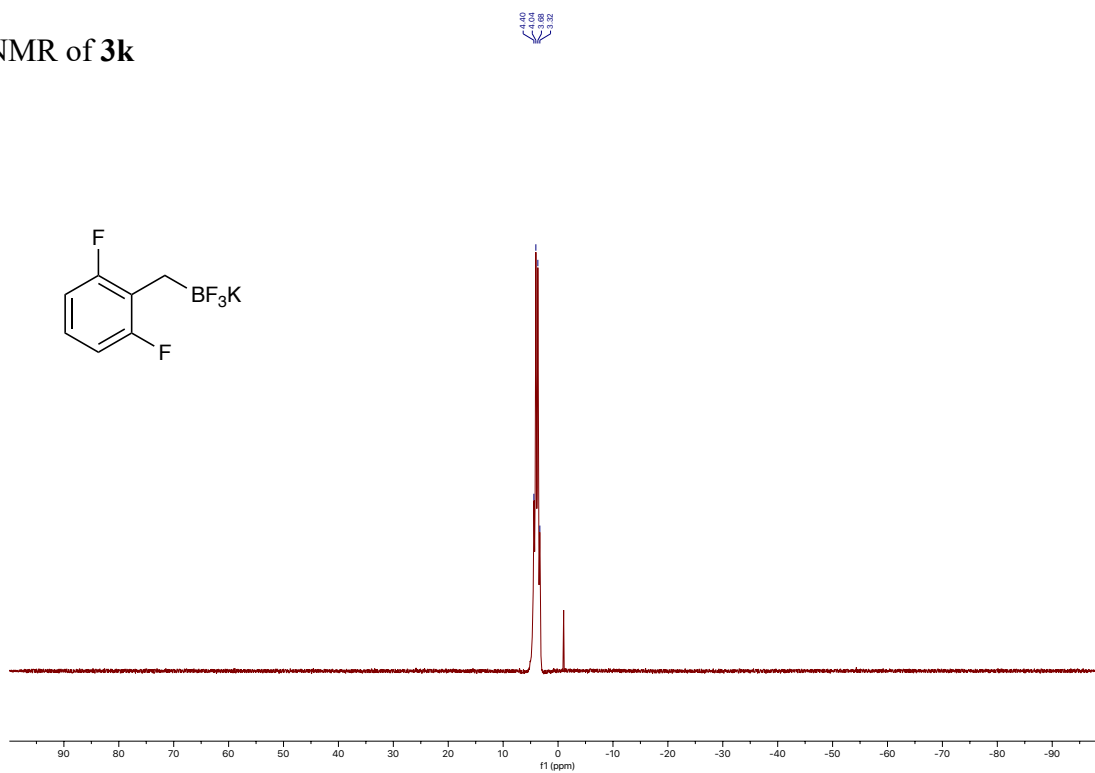

Supporting Information

$^1\text{H}$  NMR of **5b**

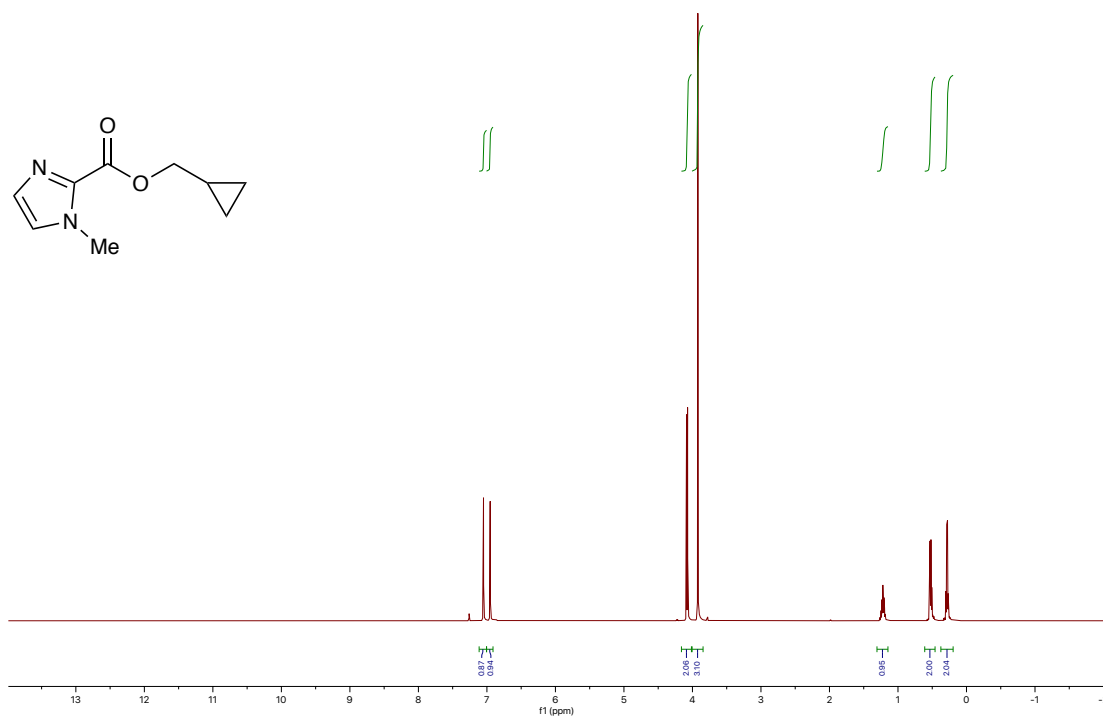

$^{13}\text{C}$  NMR of **5b**

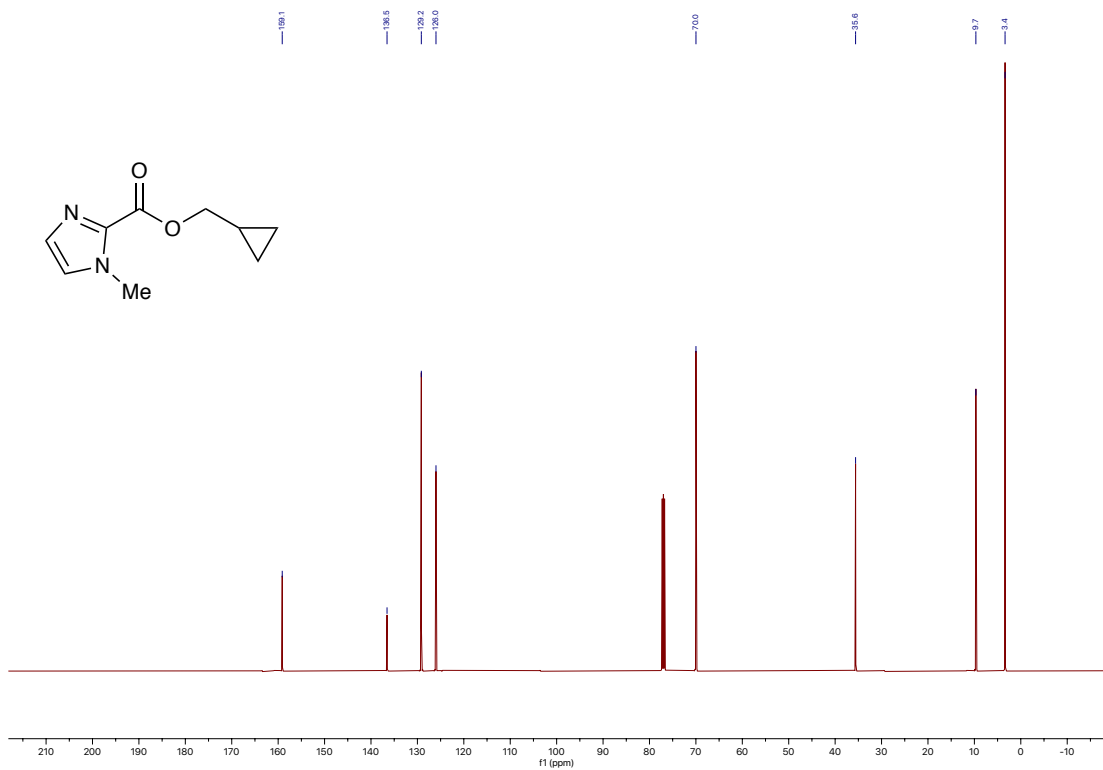

Supporting Information

$^1\text{H}$  NMR of **5c**

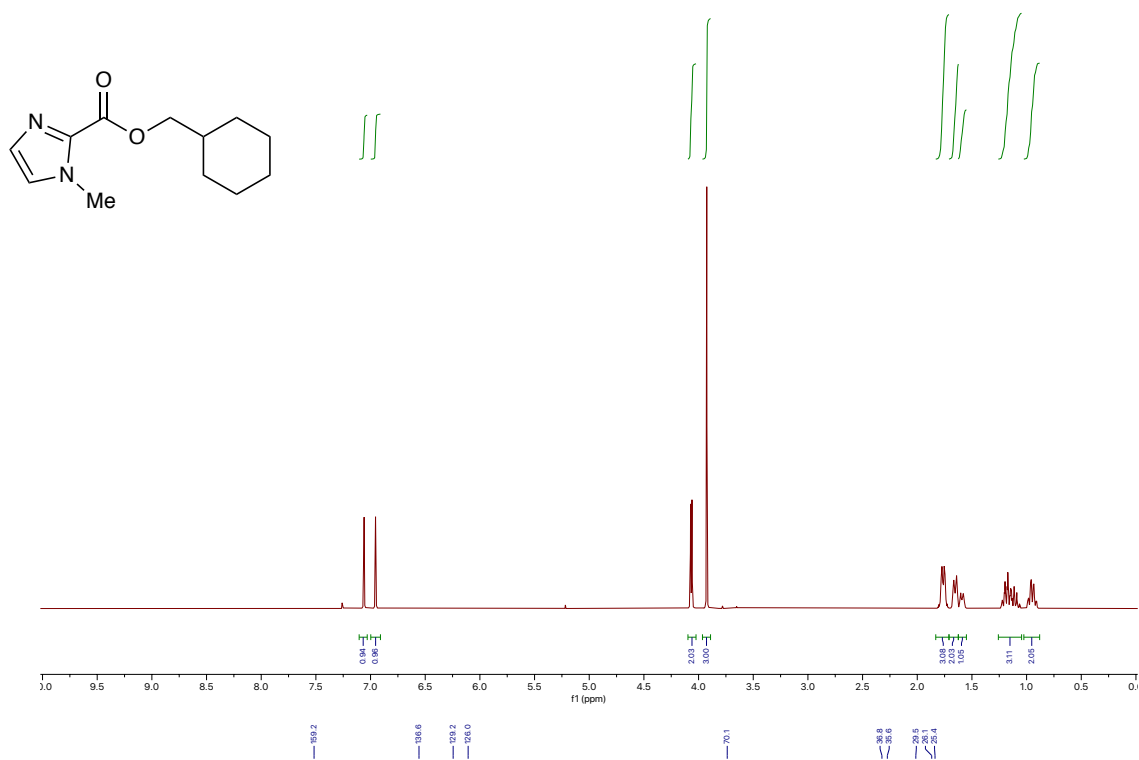

$^{13}\text{C}$  NMR of **5c**

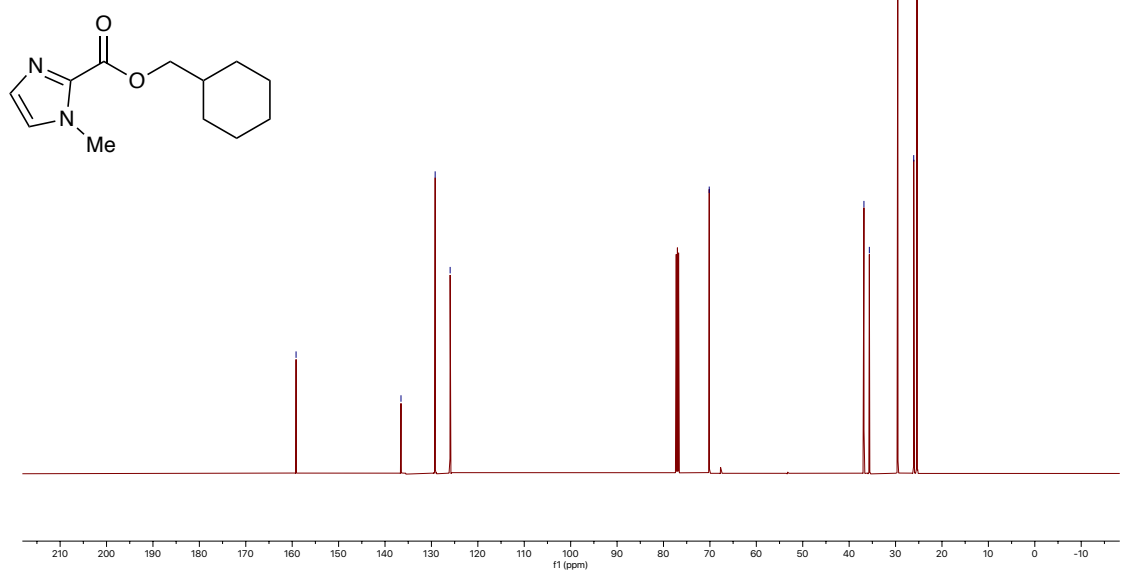



Supporting Information

$^1\text{H}$  NMR of **5d**

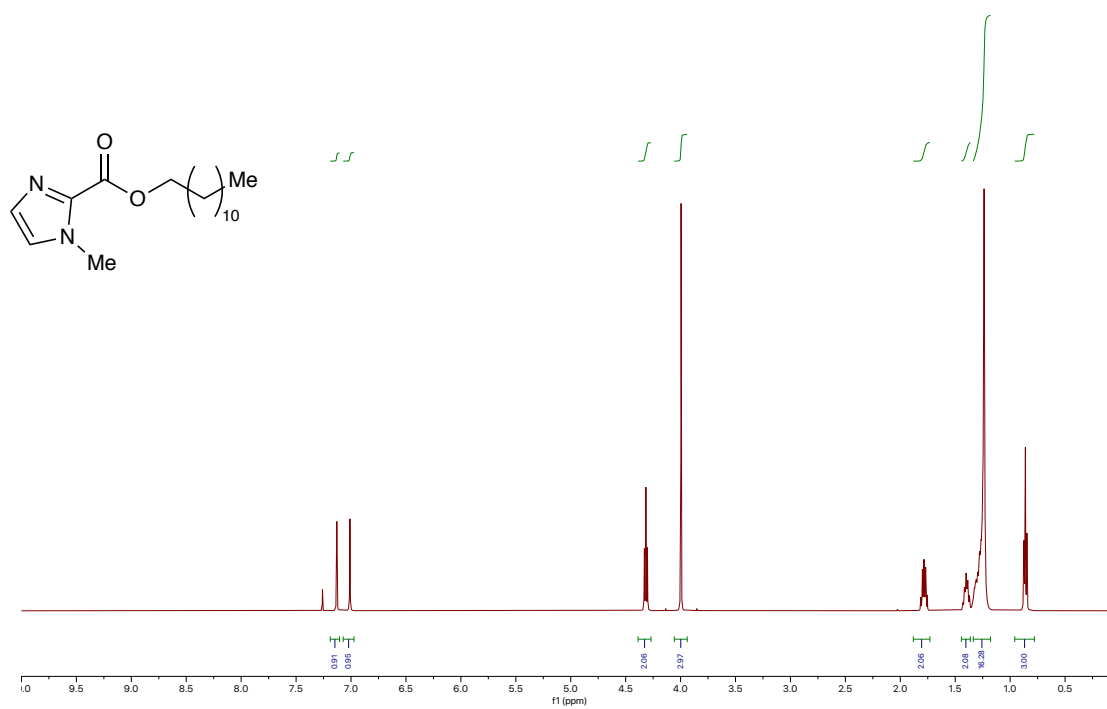

$^{13}\text{C}$  NMR of **5d**

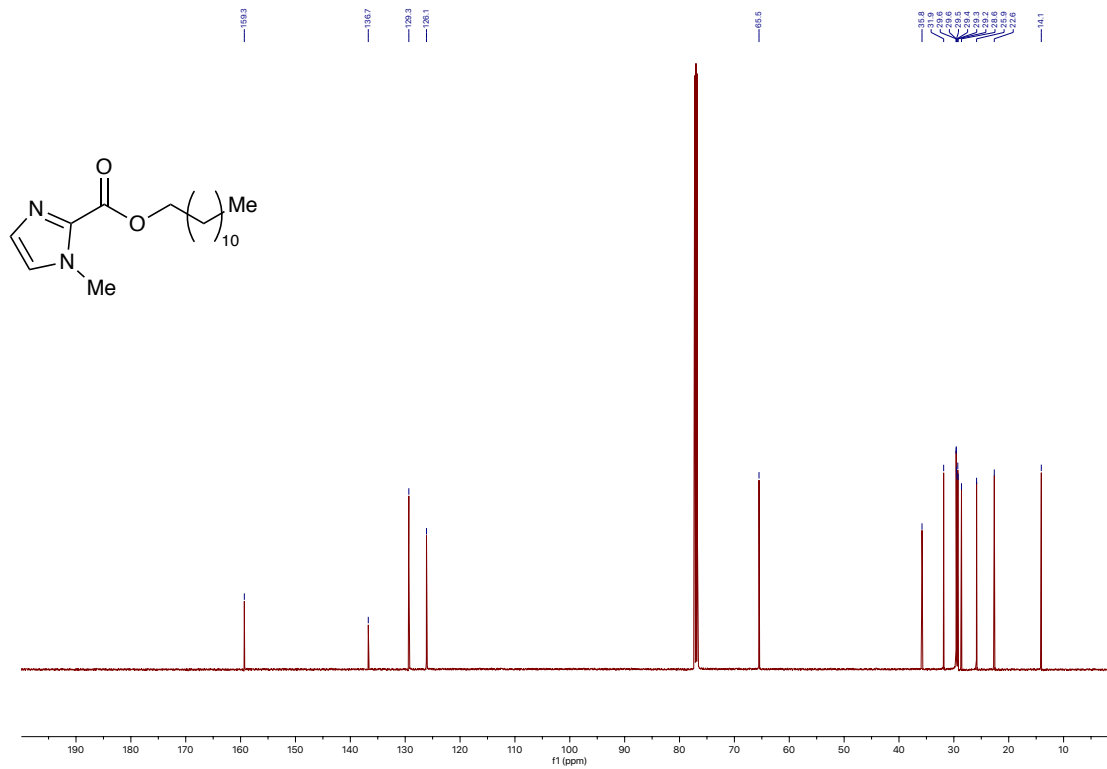

Supporting Information

$^1\text{H}$  NMR of **5e**

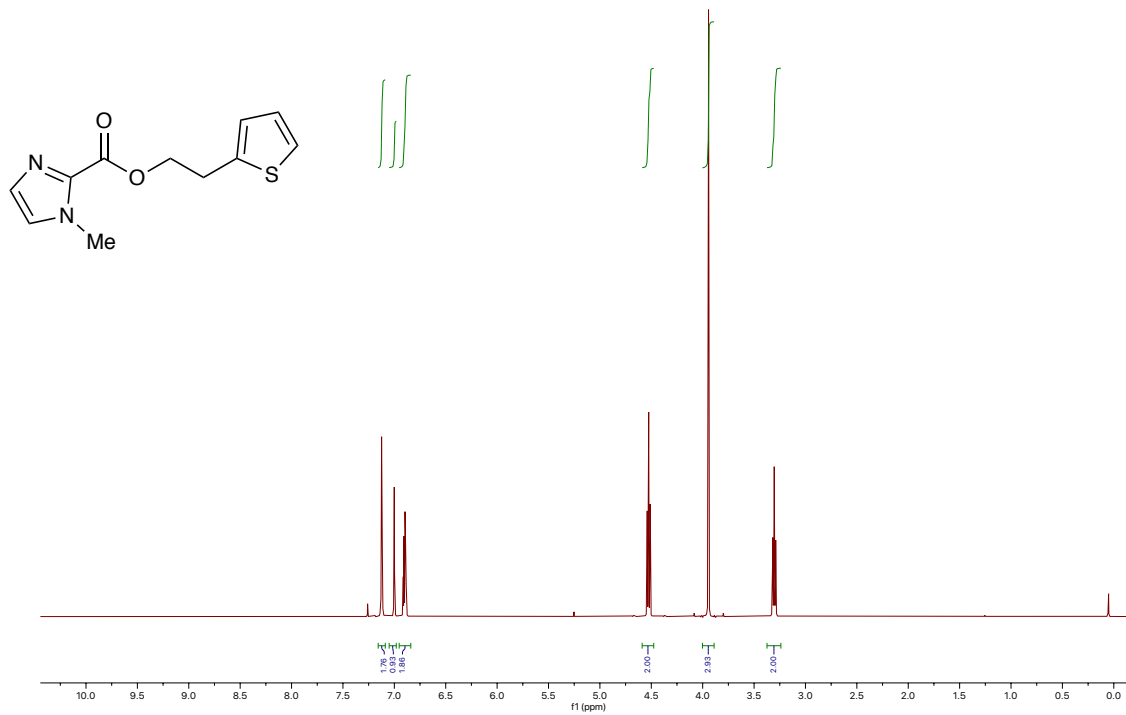

$^{13}\text{C}$  NMR of **5e**

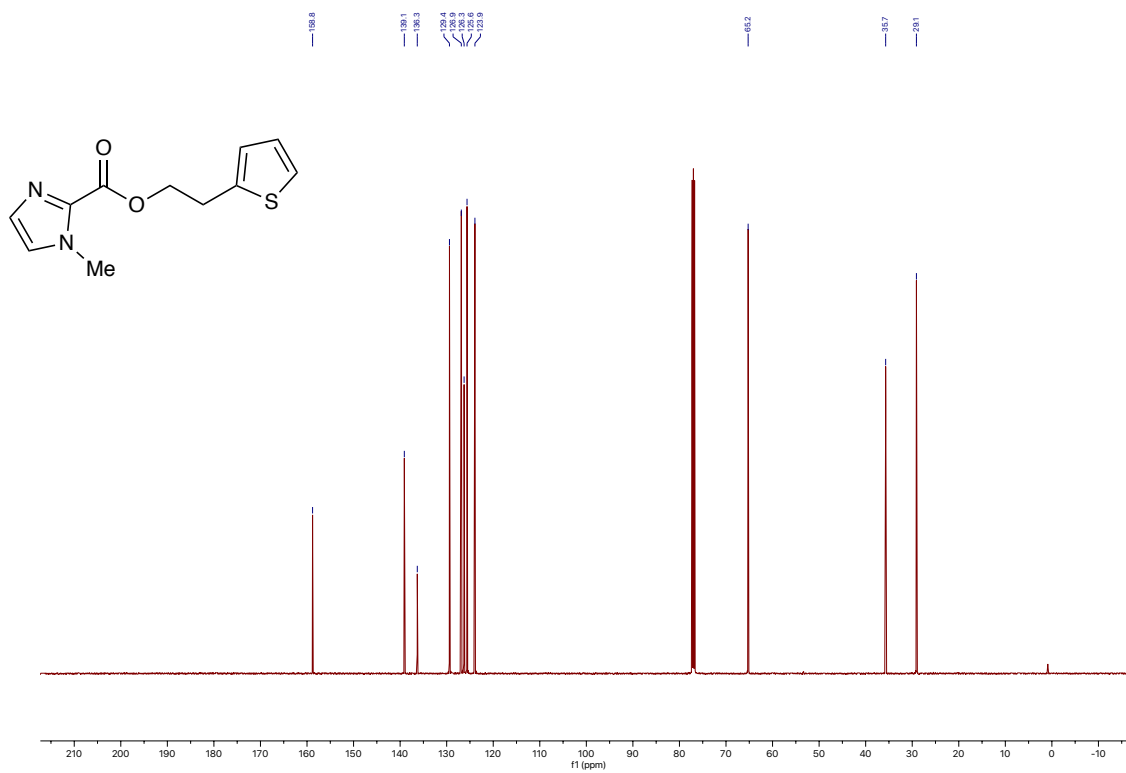

Supporting Information

$^1\text{H}$  NMR of **5f**

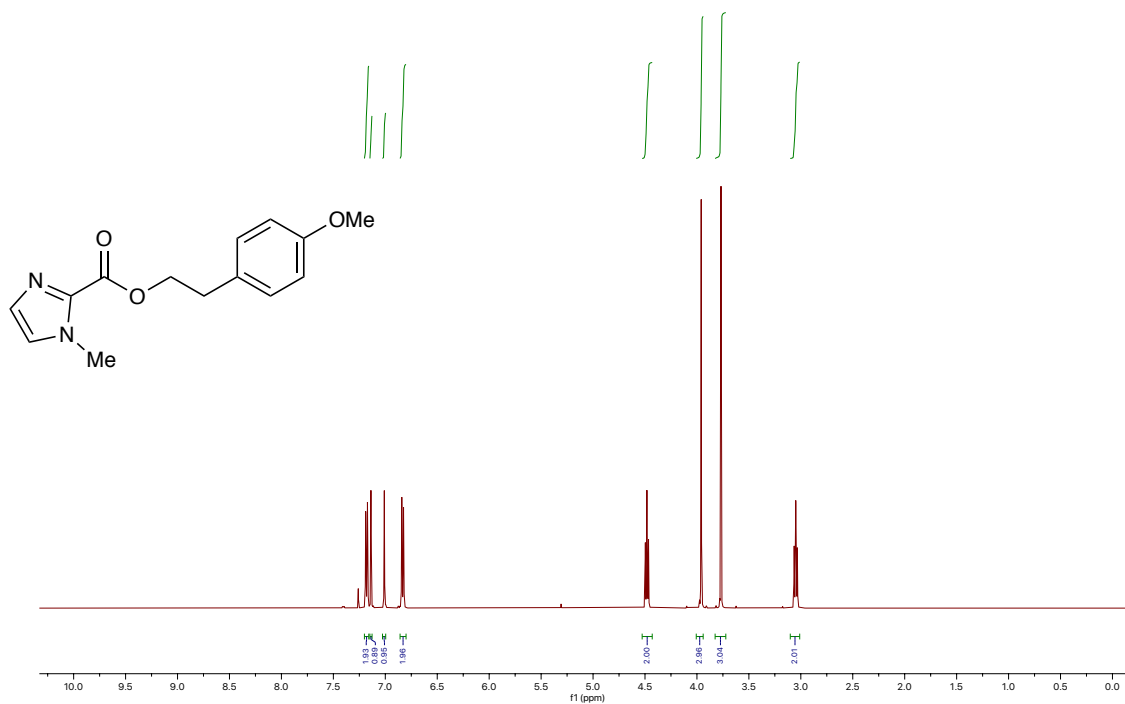

$^{13}\text{C}$  NMR of **5f**

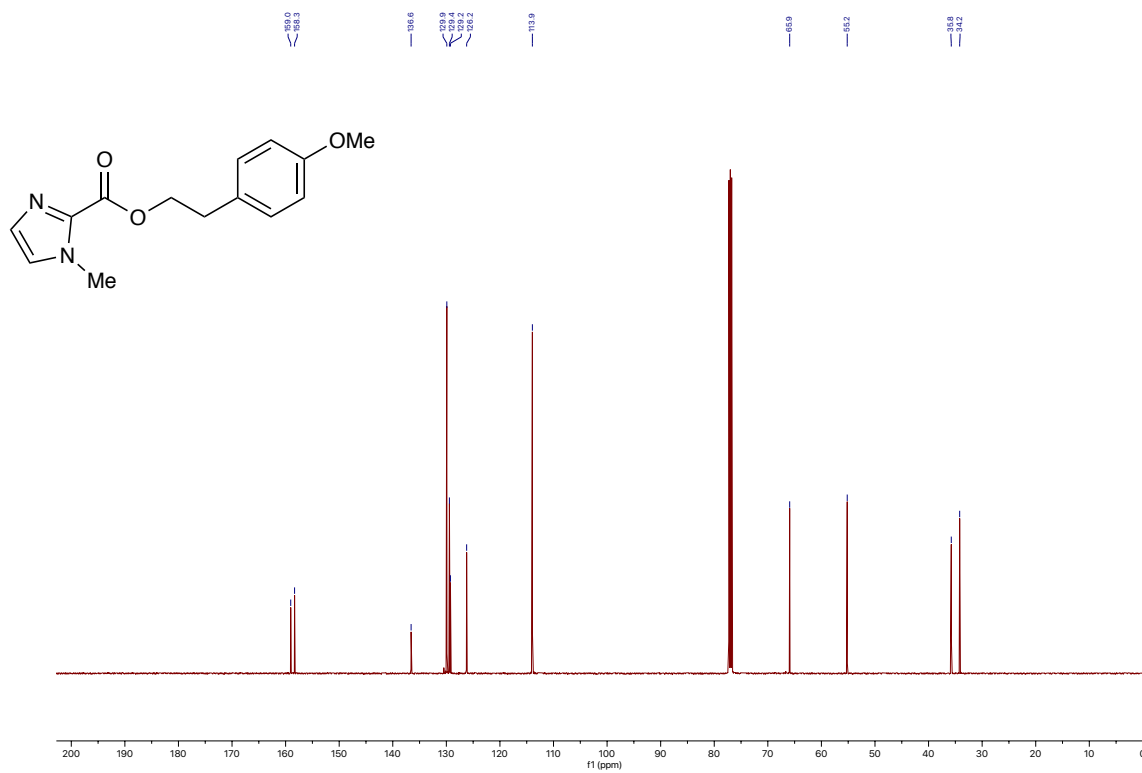

Supporting Information

$^1\text{H}$  NMR of **5g**

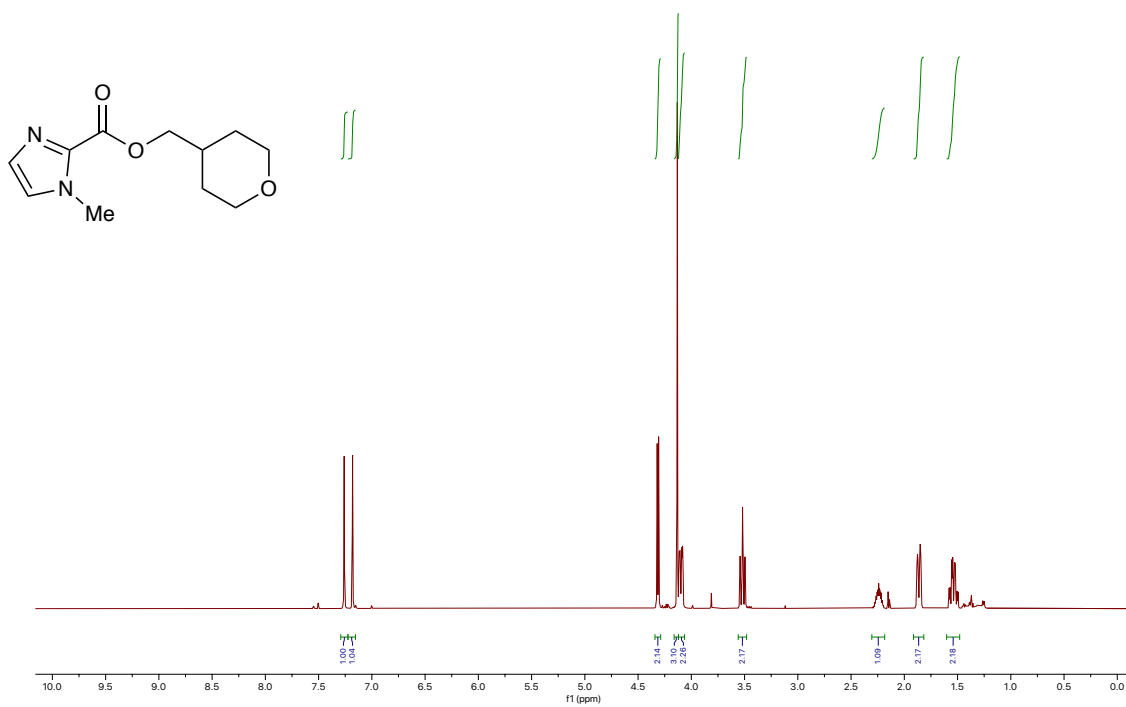

$^{13}\text{C}$  NMR of **5g**

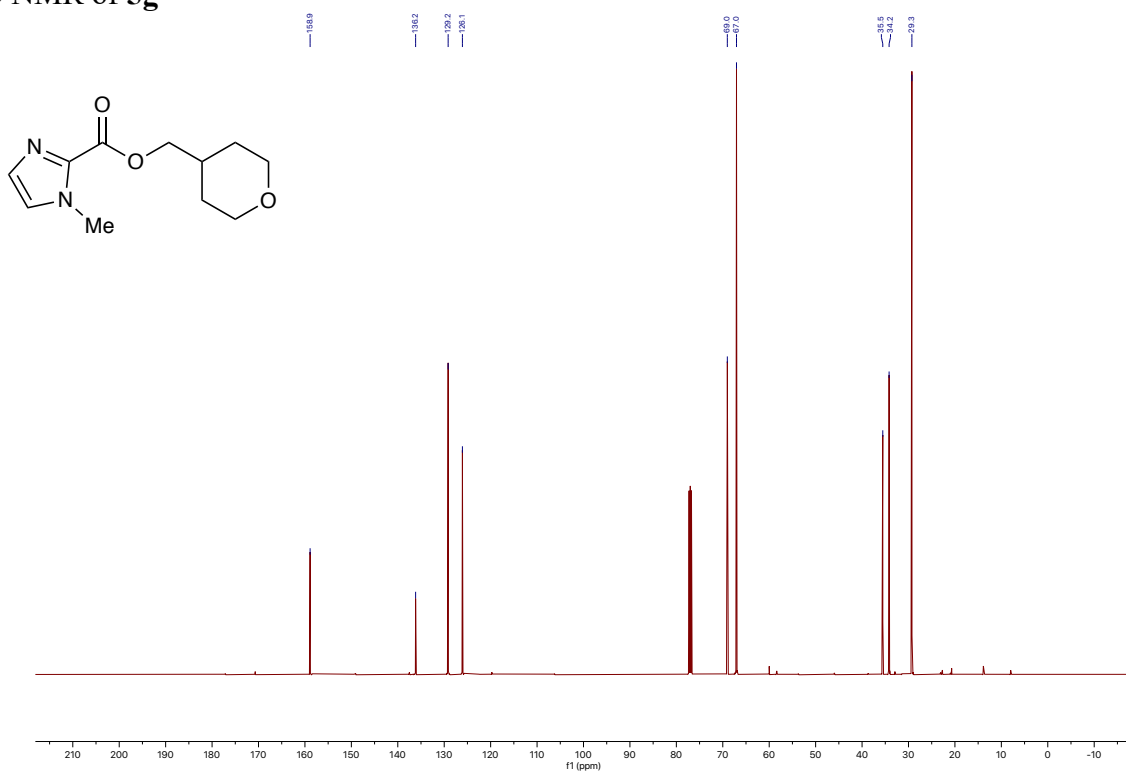

Supporting Information

$^1\text{H}$  NMR of **5h**

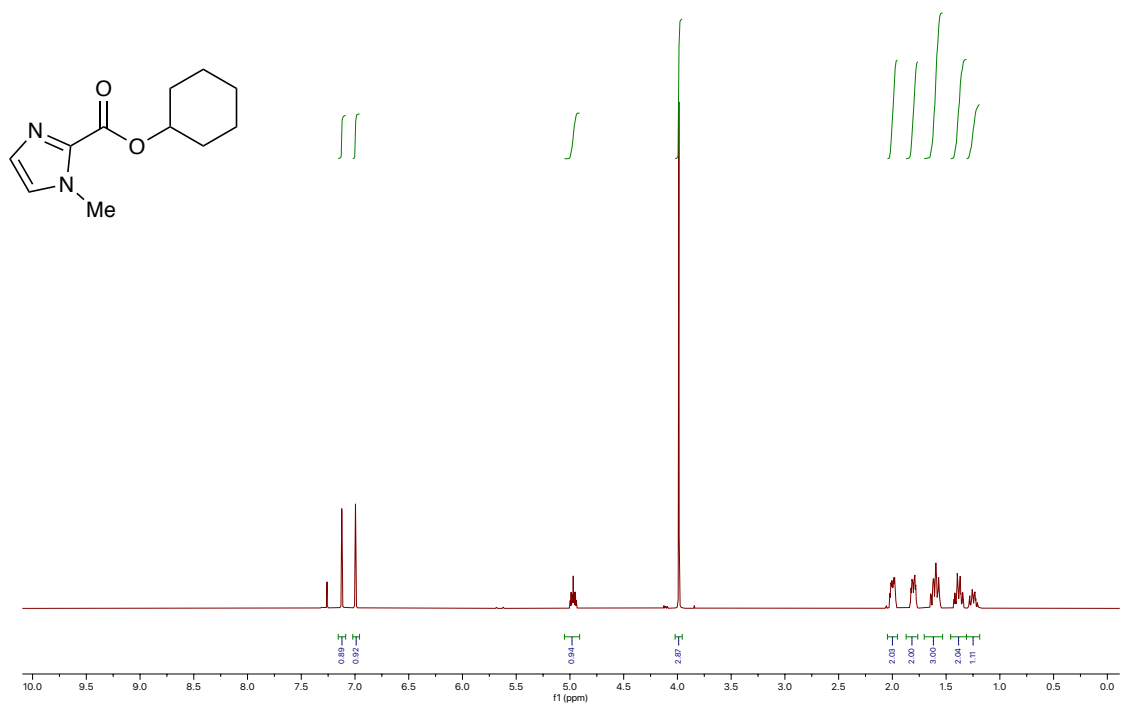

$^{13}\text{C}$  NMR of **5h**

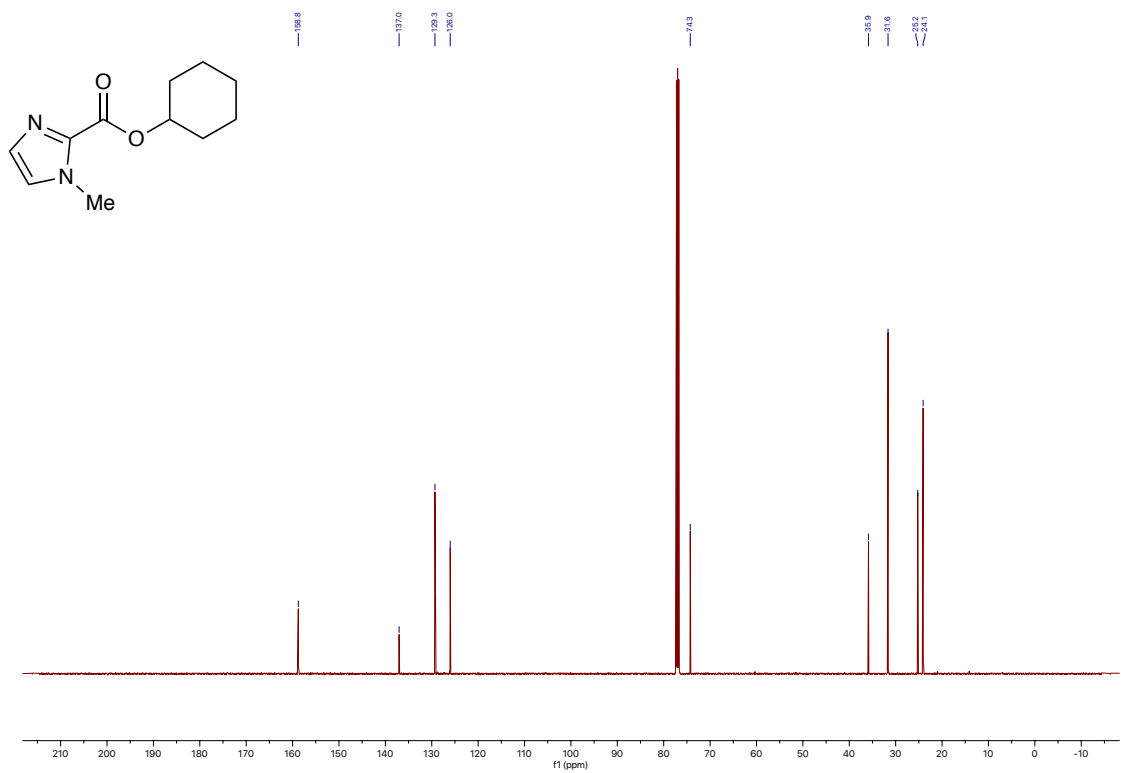

Supporting Information

$^1\text{H}$  NMR of **5i**

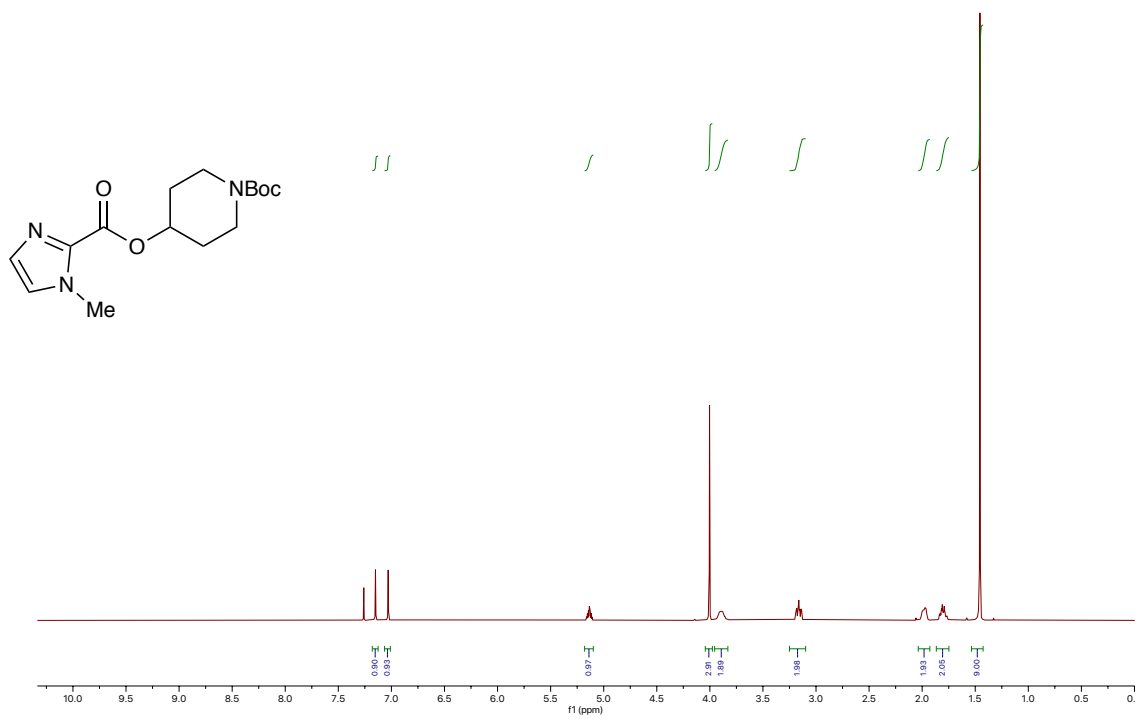

$^{13}\text{C}$  NMR of **5i**

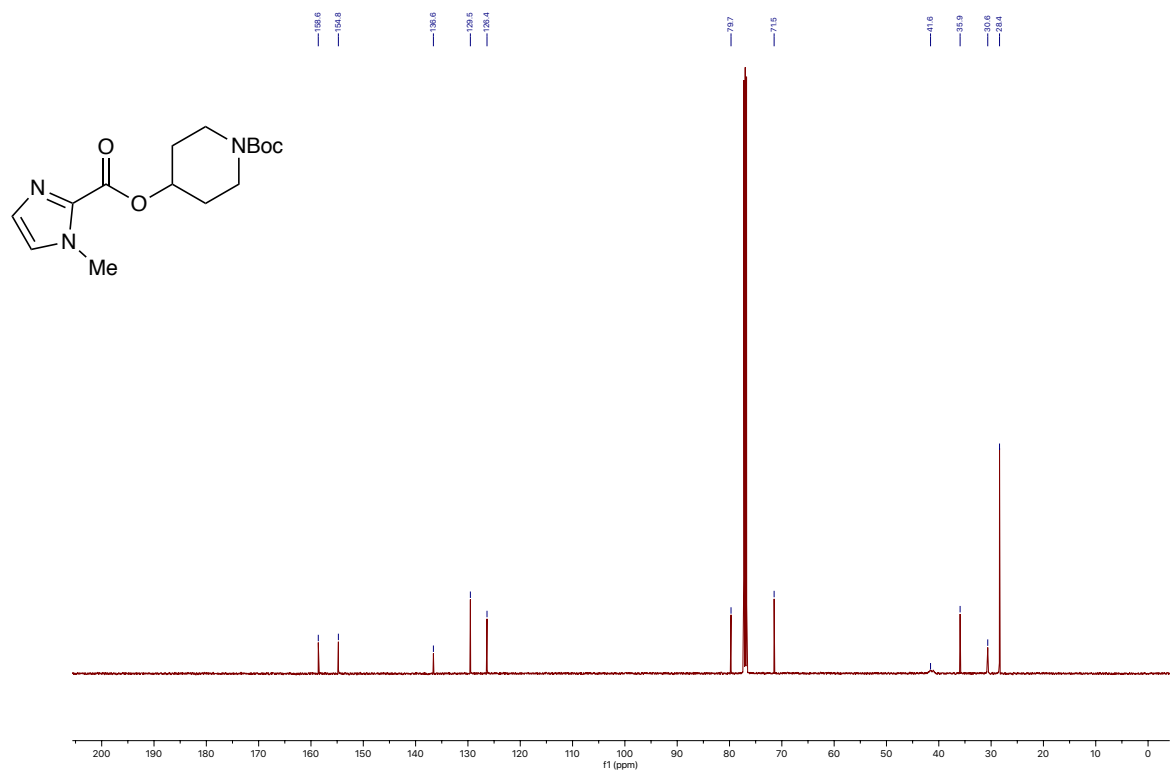

Supporting Information

$^1\text{H}$  NMR of **5j**

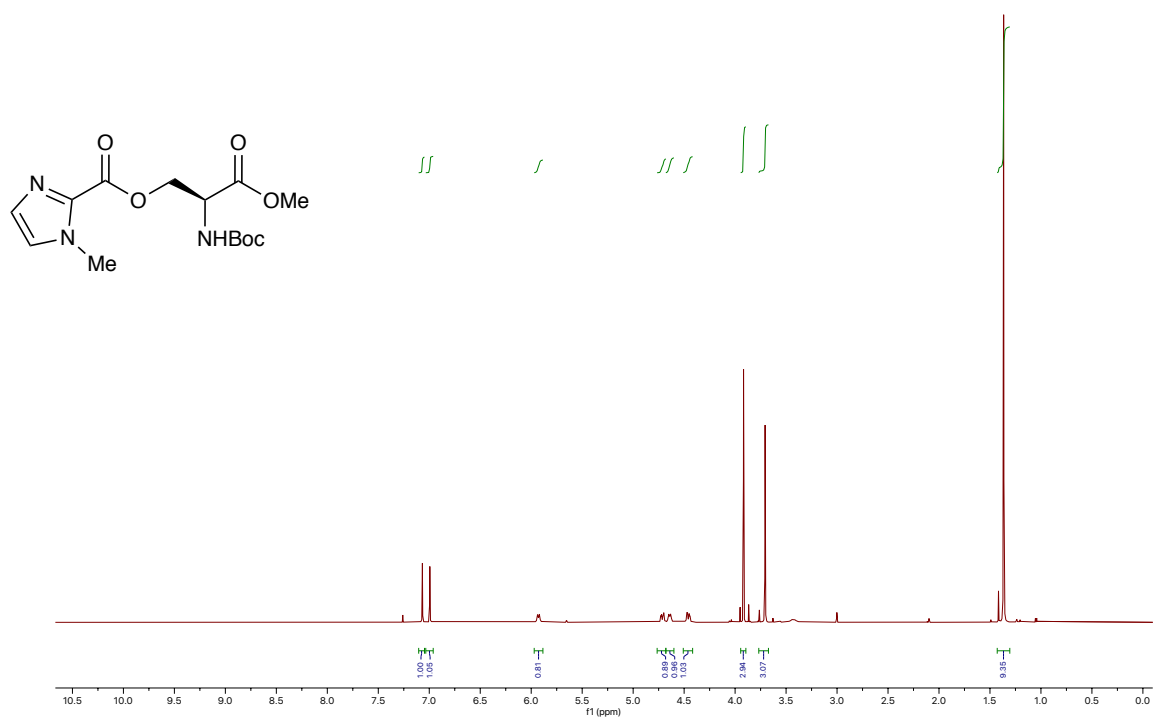

$^{13}\text{C}$  NMR of **5j**

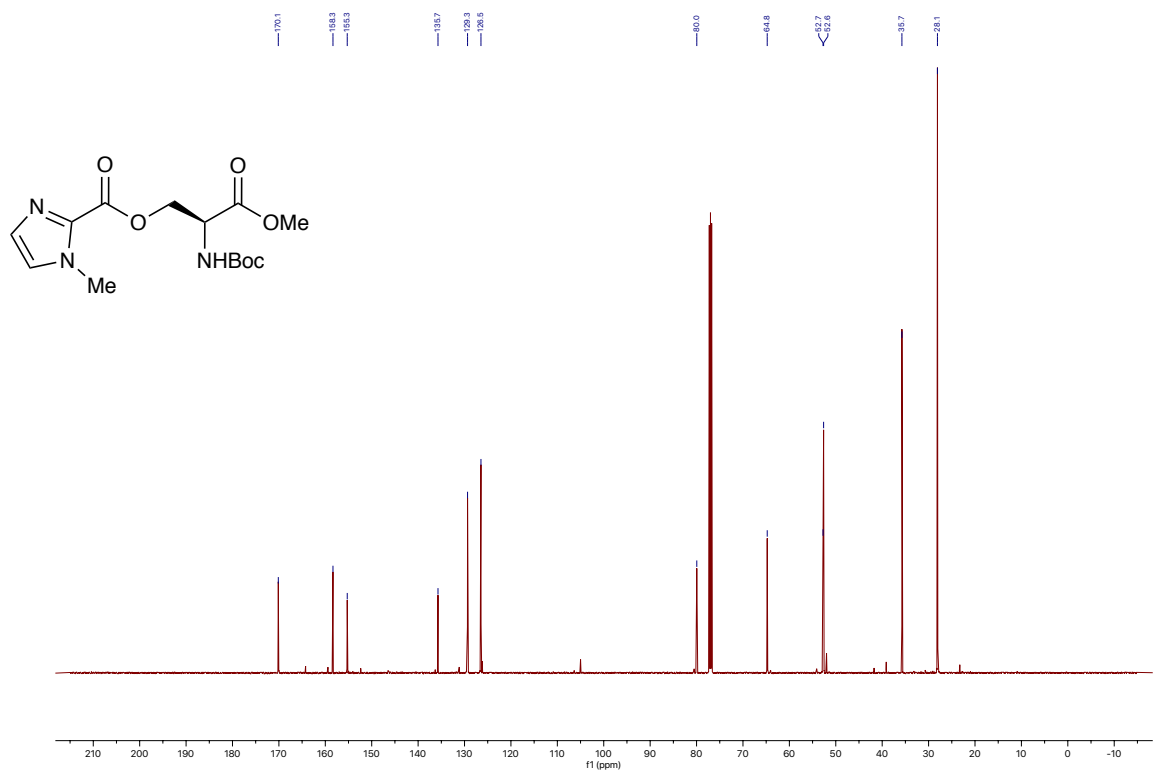

Supporting Information

$^1\text{H}$  NMR of **5k**

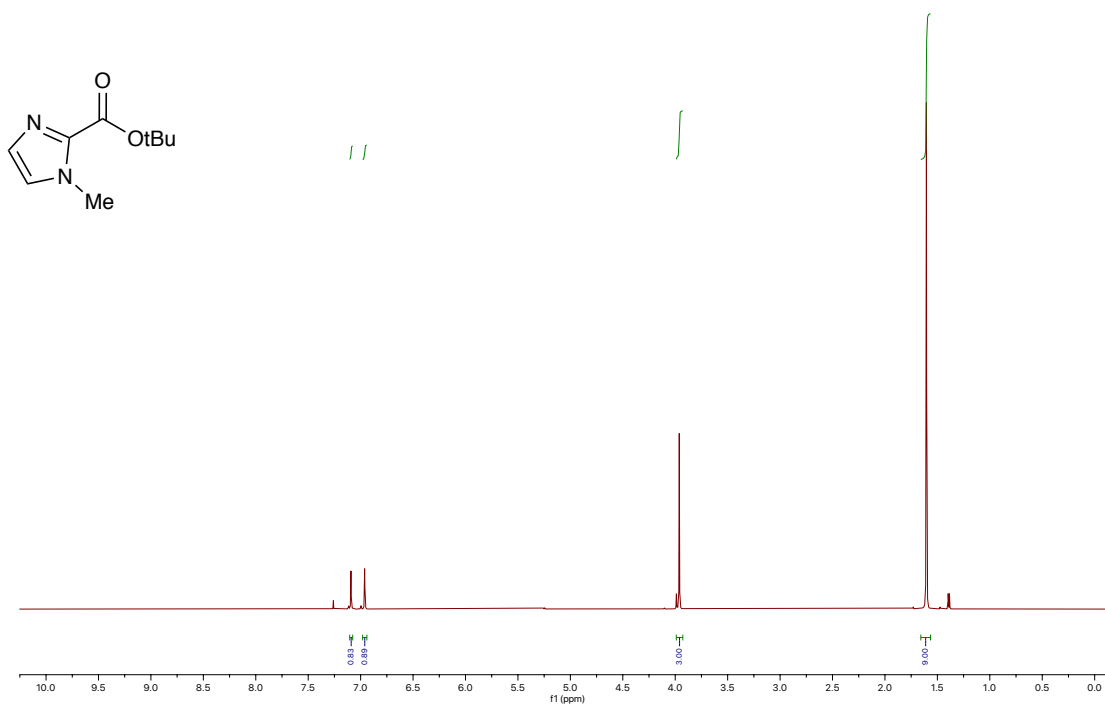

$^{13}\text{C}$  NMR of **5k**

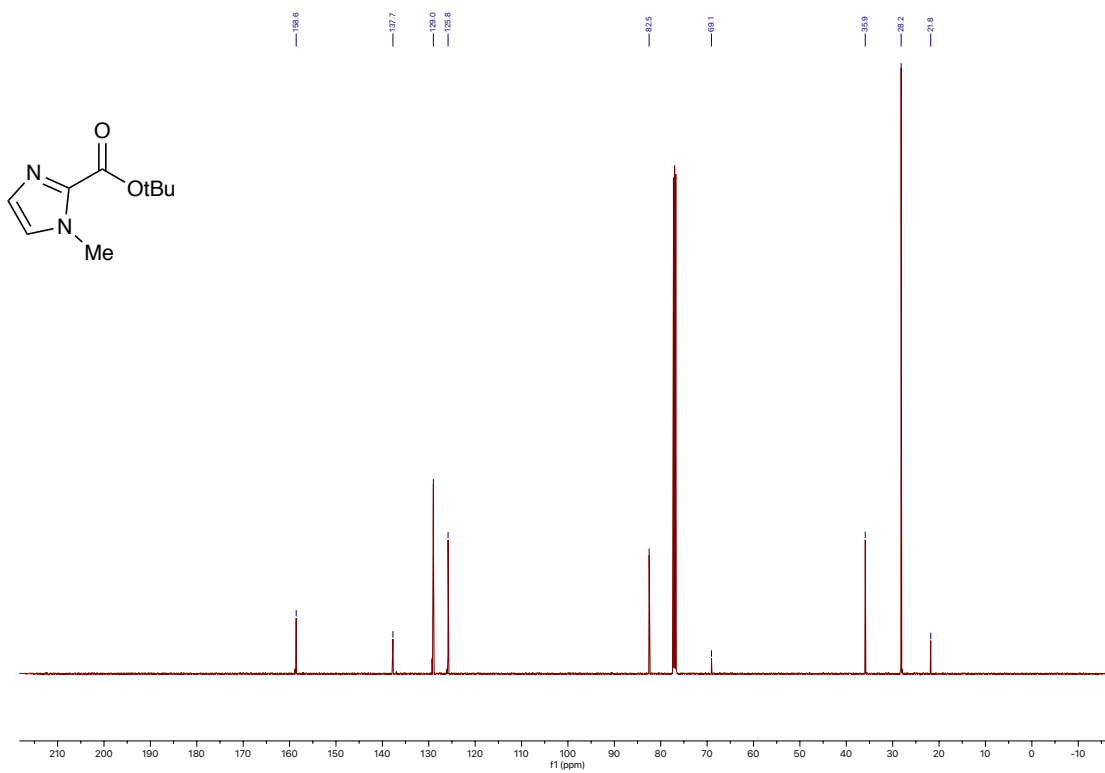



Supporting Information

$^1\text{H}$  NMR of **51**

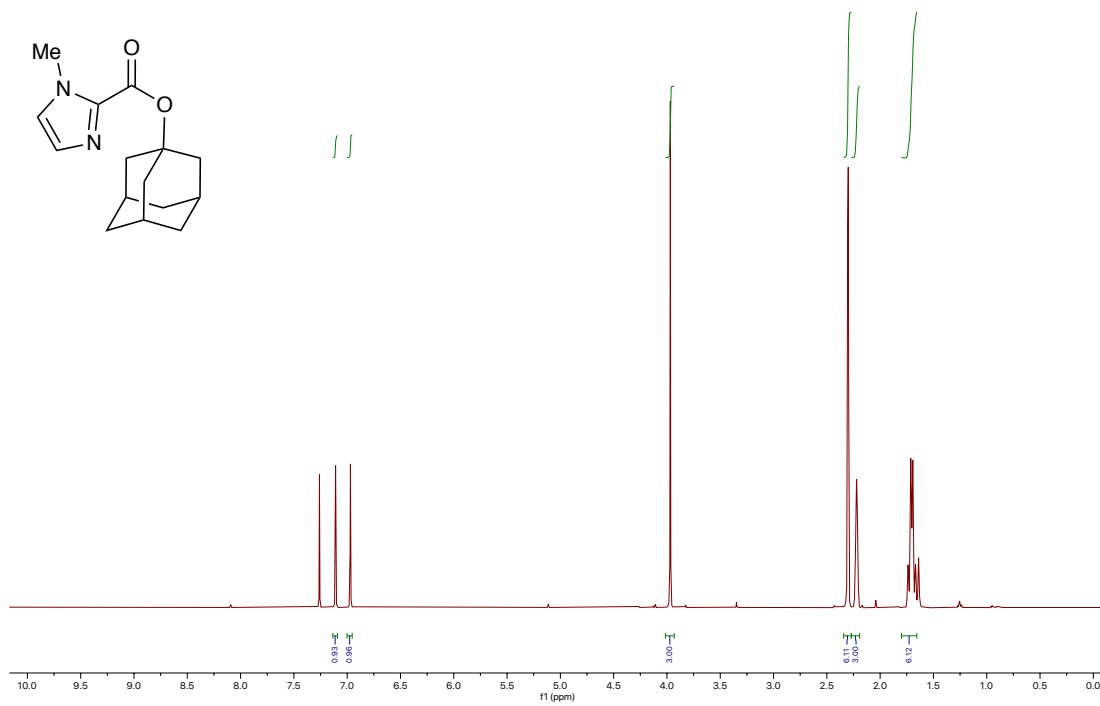

$^{13}\text{C}$  NMR of **51**

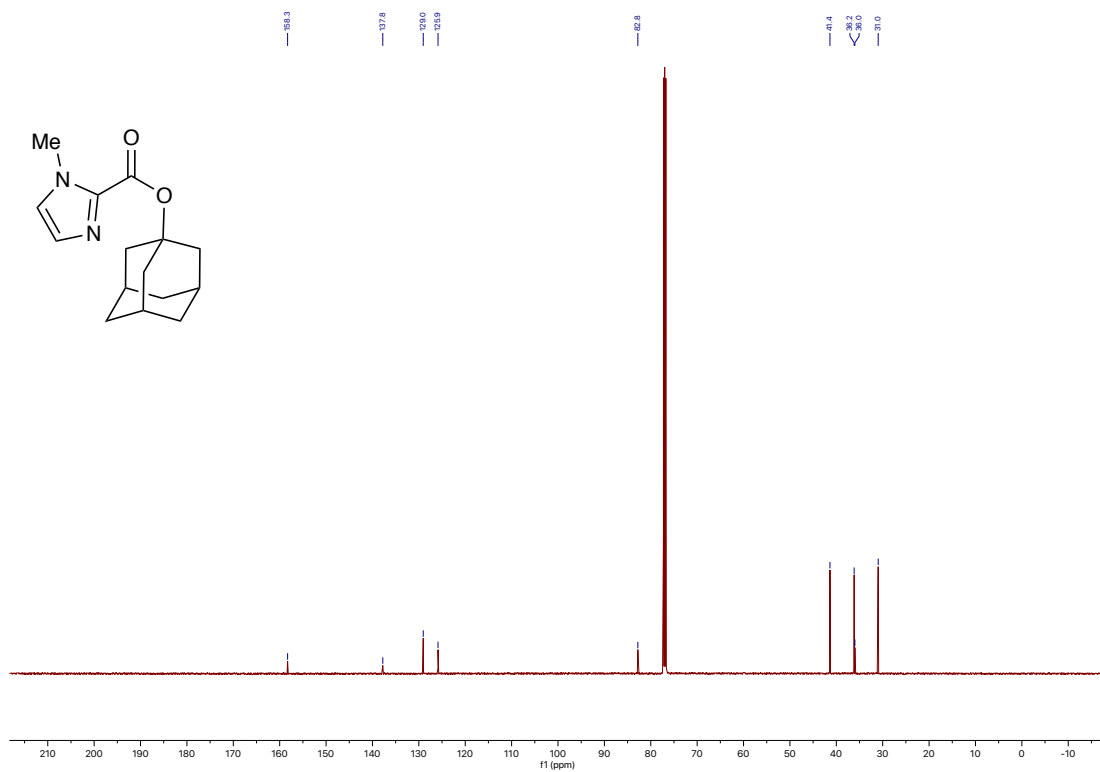

Supporting Information

$^1\text{H}$  NMR of **5m**

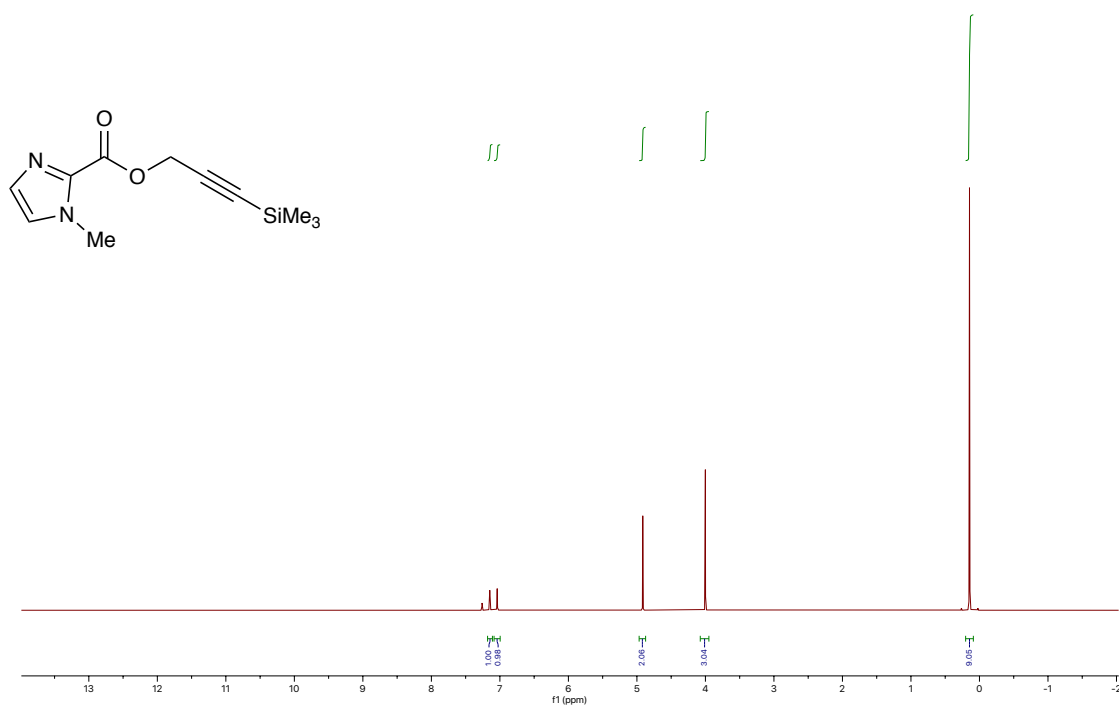

$^{13}\text{C}$  NMR of **5m**

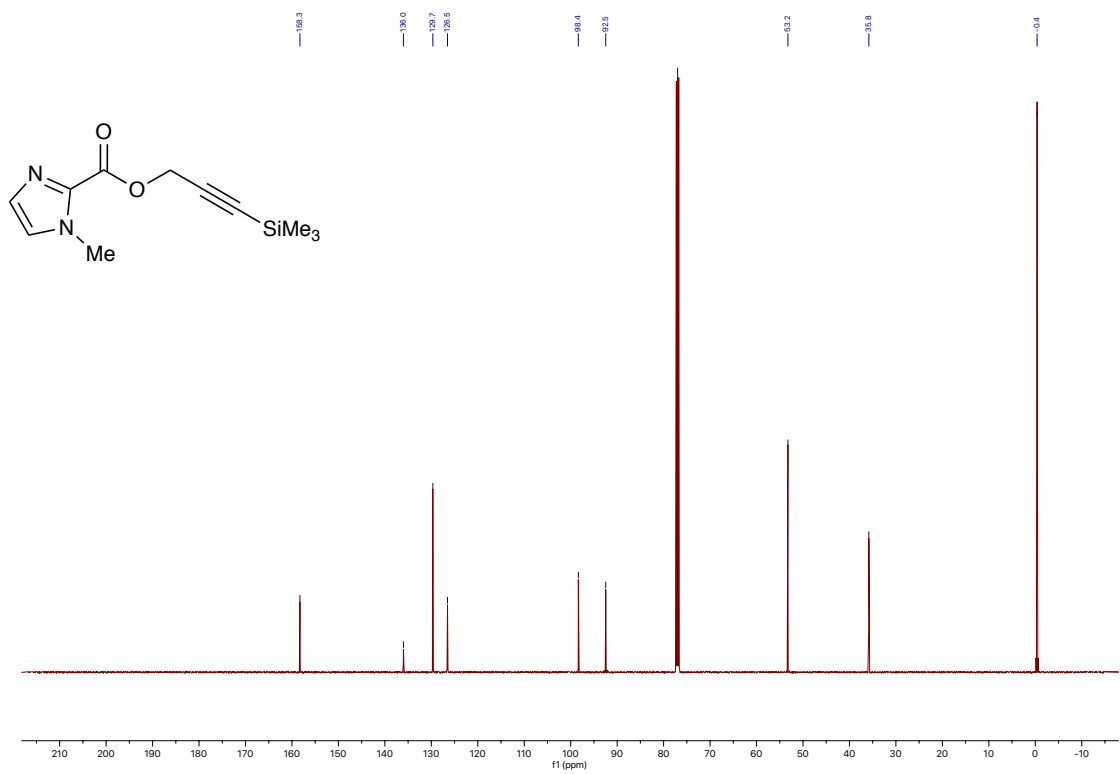

Supporting Information

$^1\text{H}$  NMR of **5n**

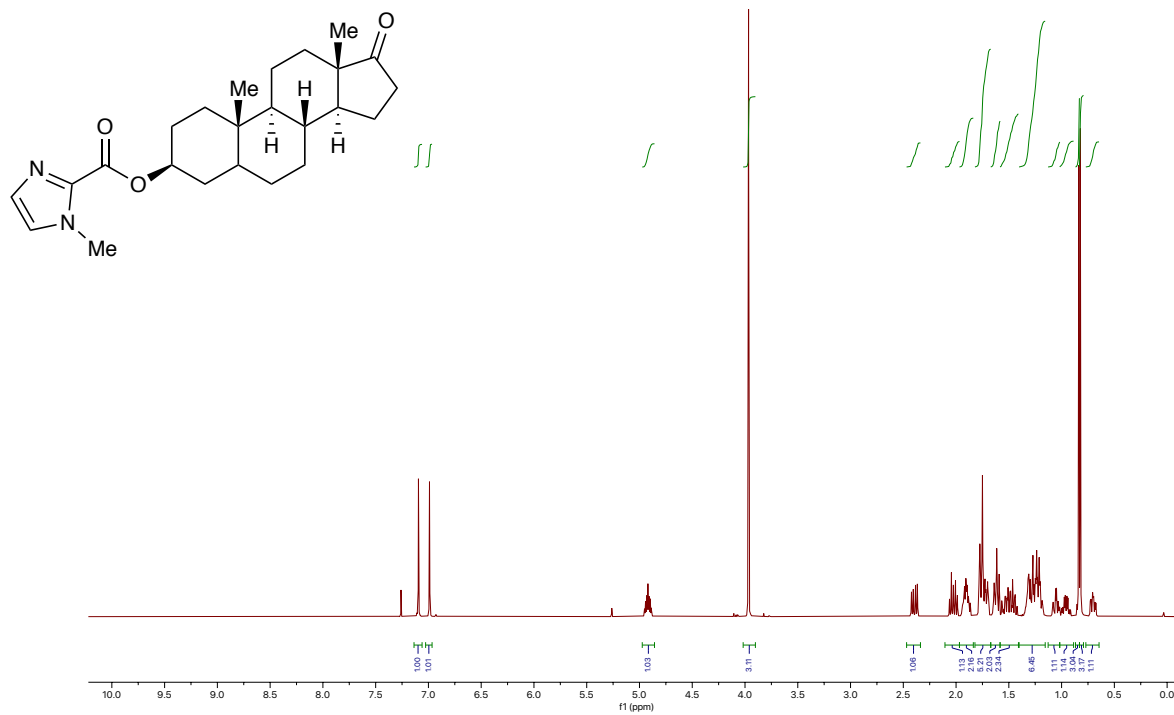

$^{13}\text{C}$  NMR of **5n**

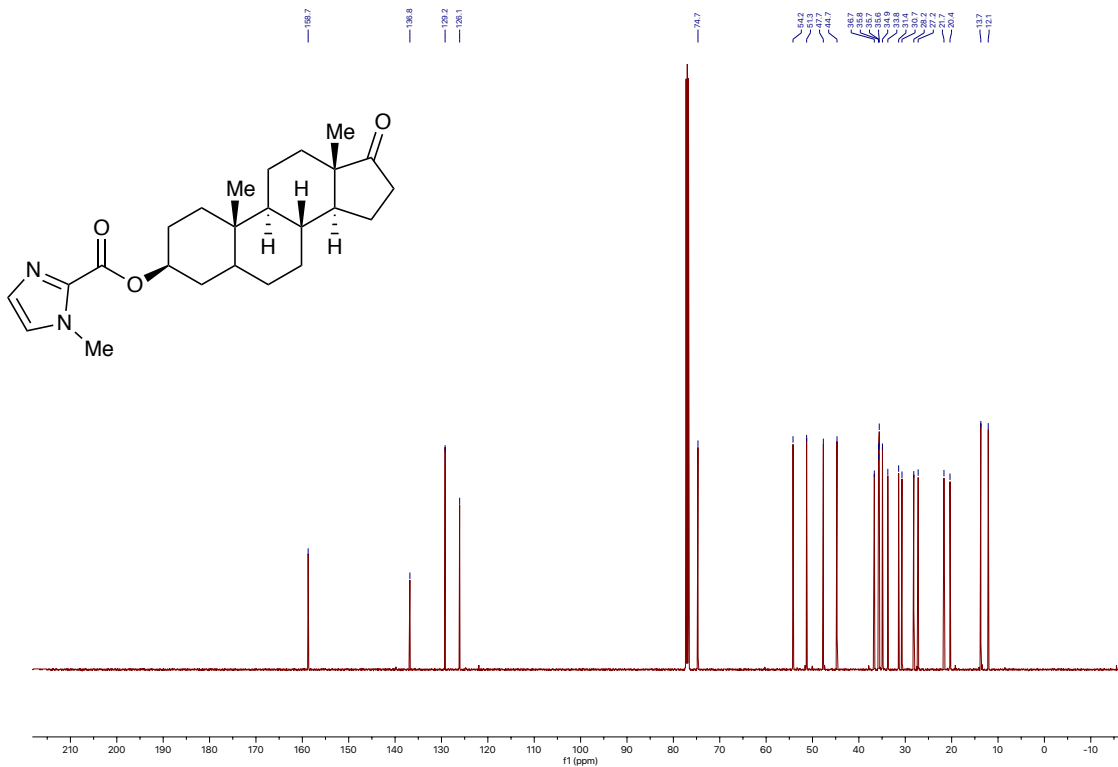

Supporting Information

$^1\text{H}$  NMR of **5o**

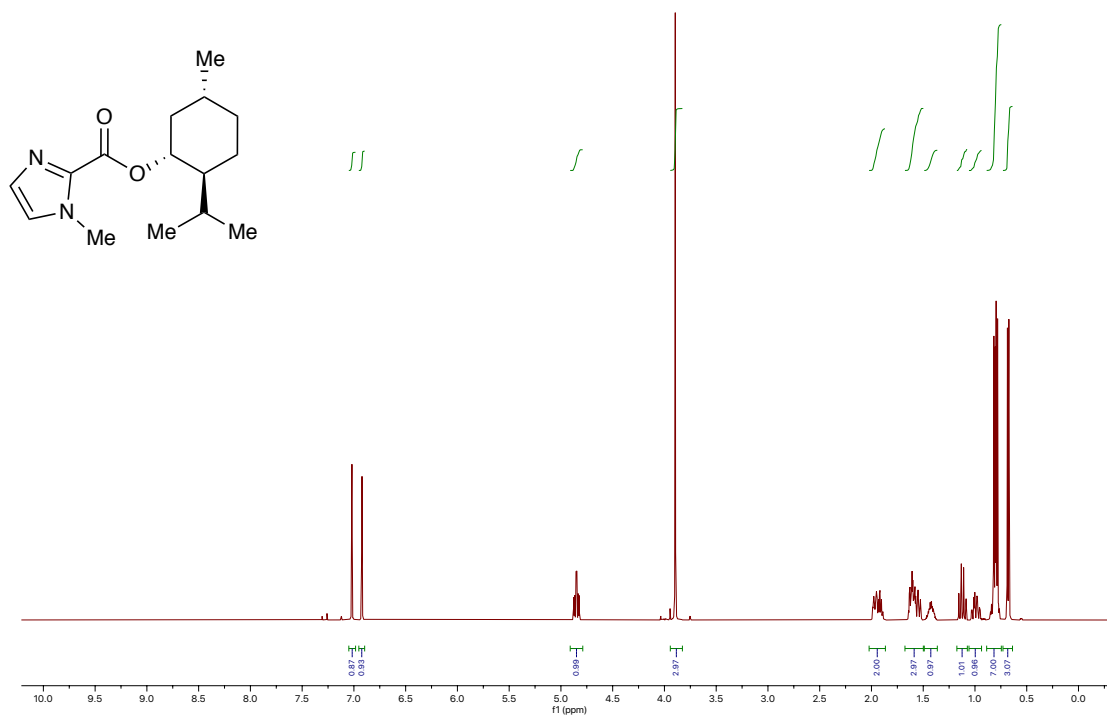

$^{13}\text{C}$  NMR of **5o**

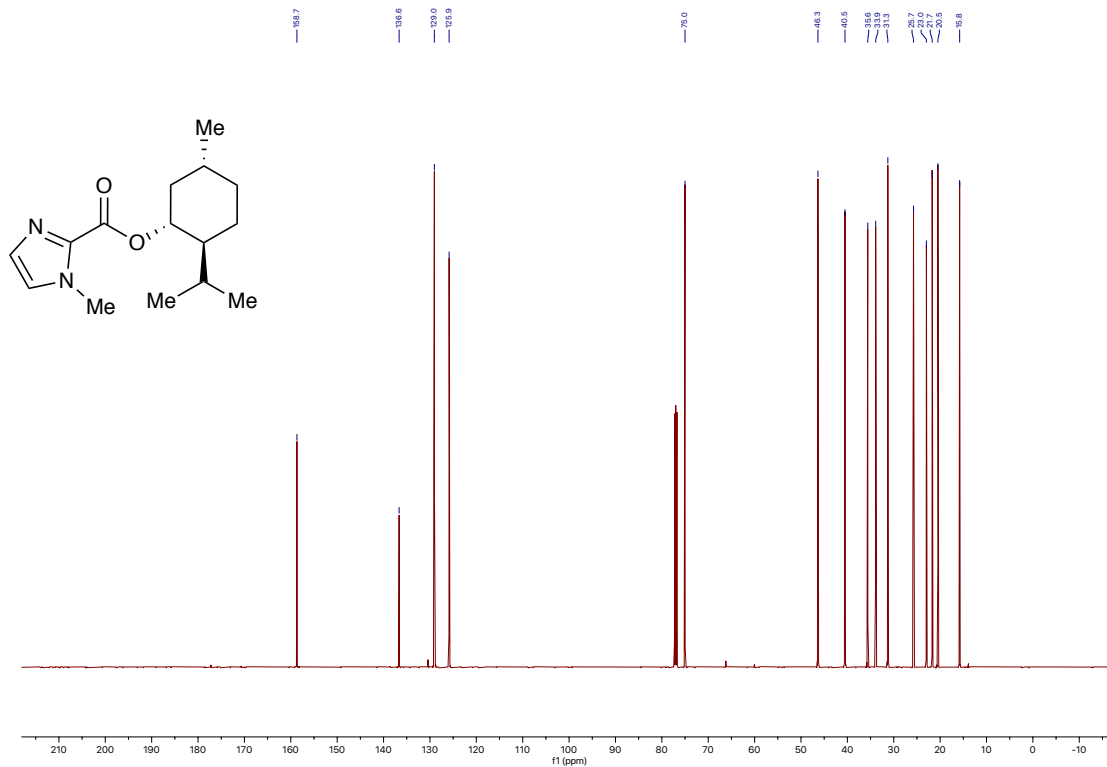

Supporting Information

$^1\text{H}$  NMR of **1b**

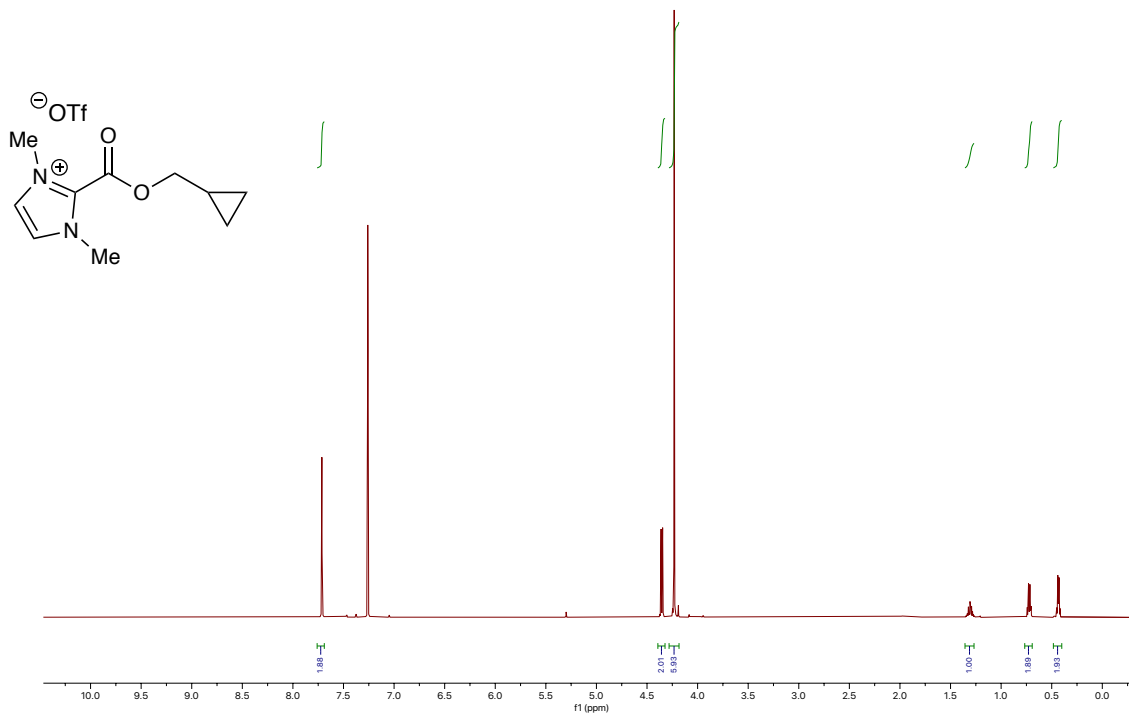

$^{13}\text{C}$  NMR of **1b**

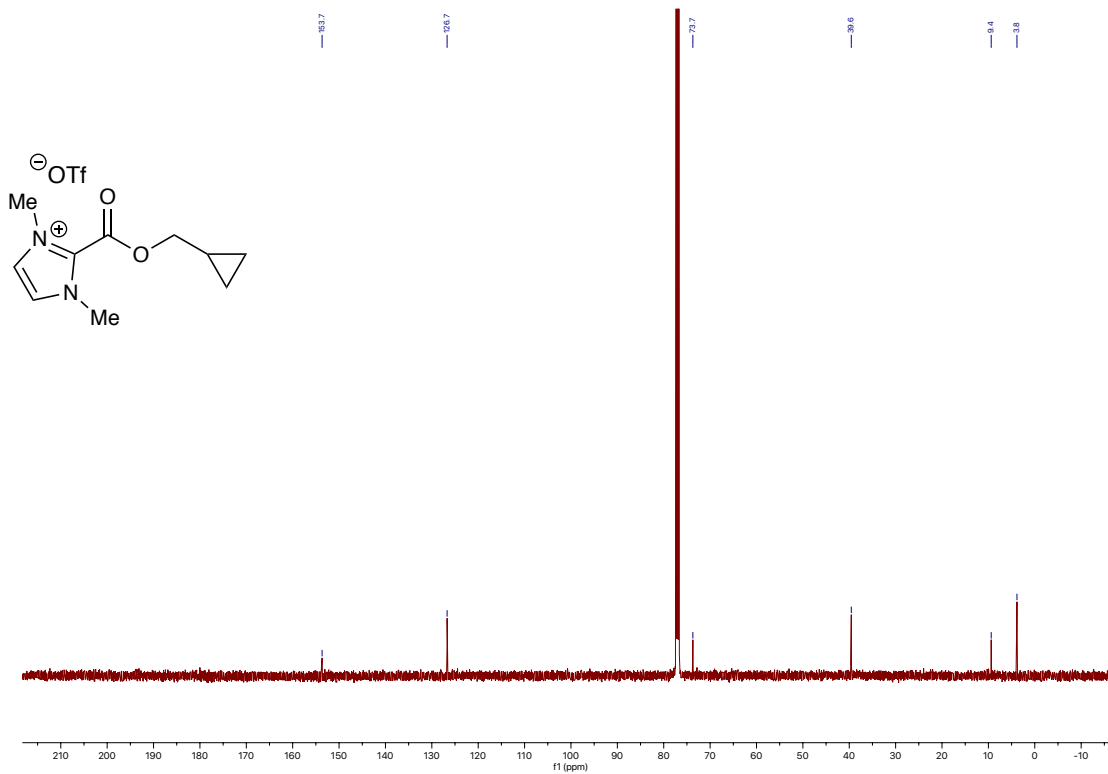

# Supporting Information

## $^1\text{H}$ NMR of **1c**

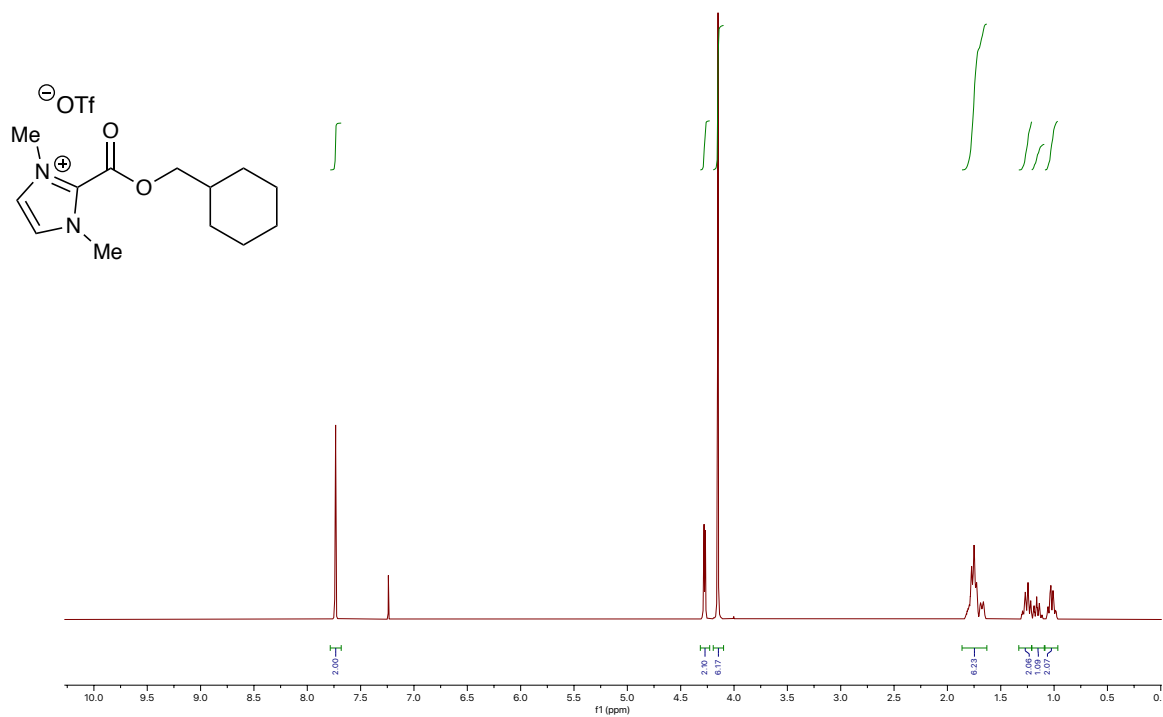

## $^{13}\text{C}$ NMR of **1c**

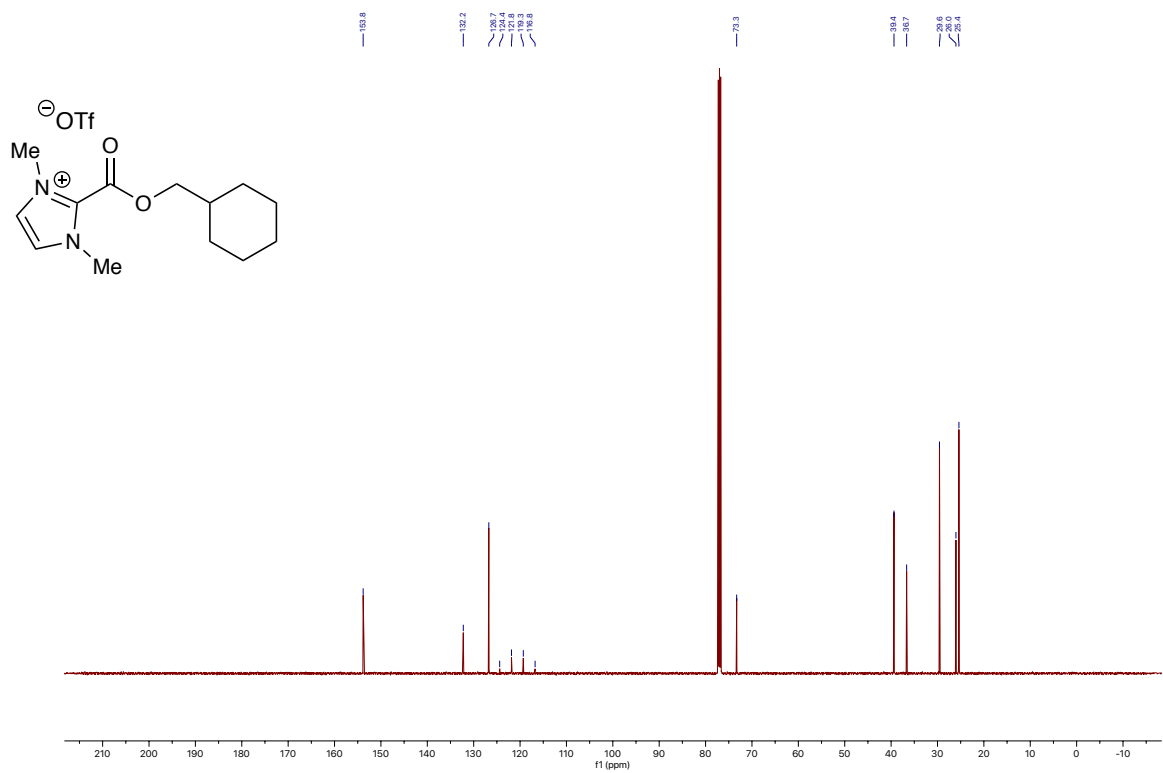

## Supporting Information

### $^1\text{H}$ NMR of **1d**

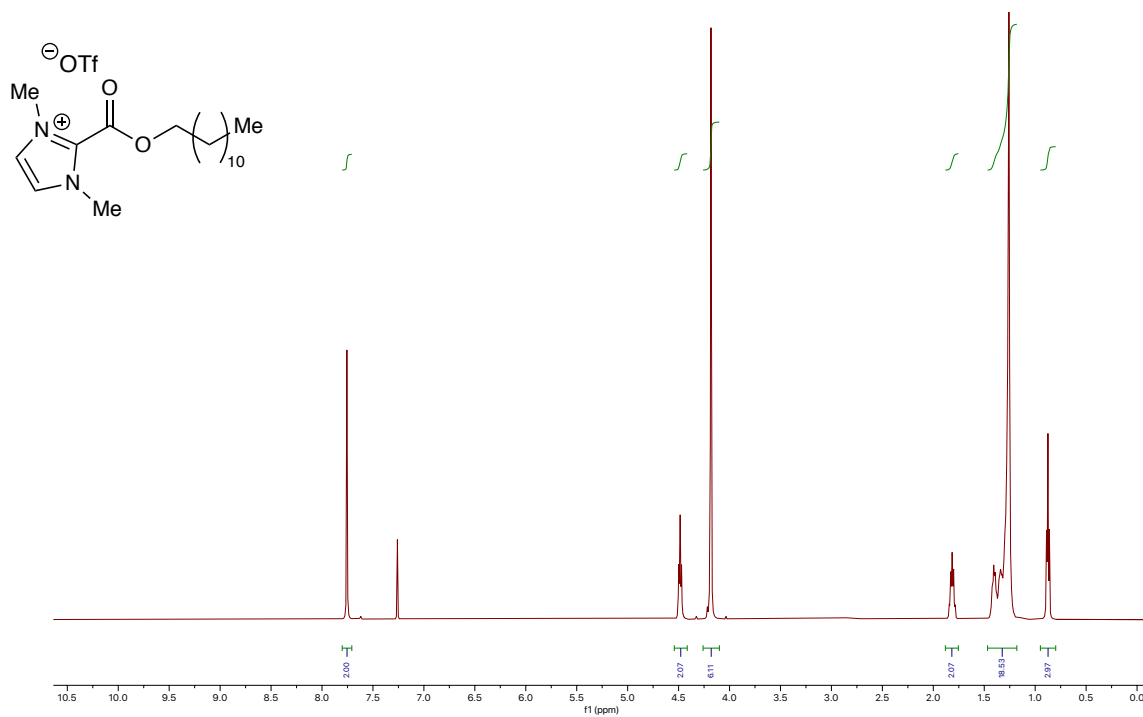

### $^{13}\text{C}$ NMR of **1d**

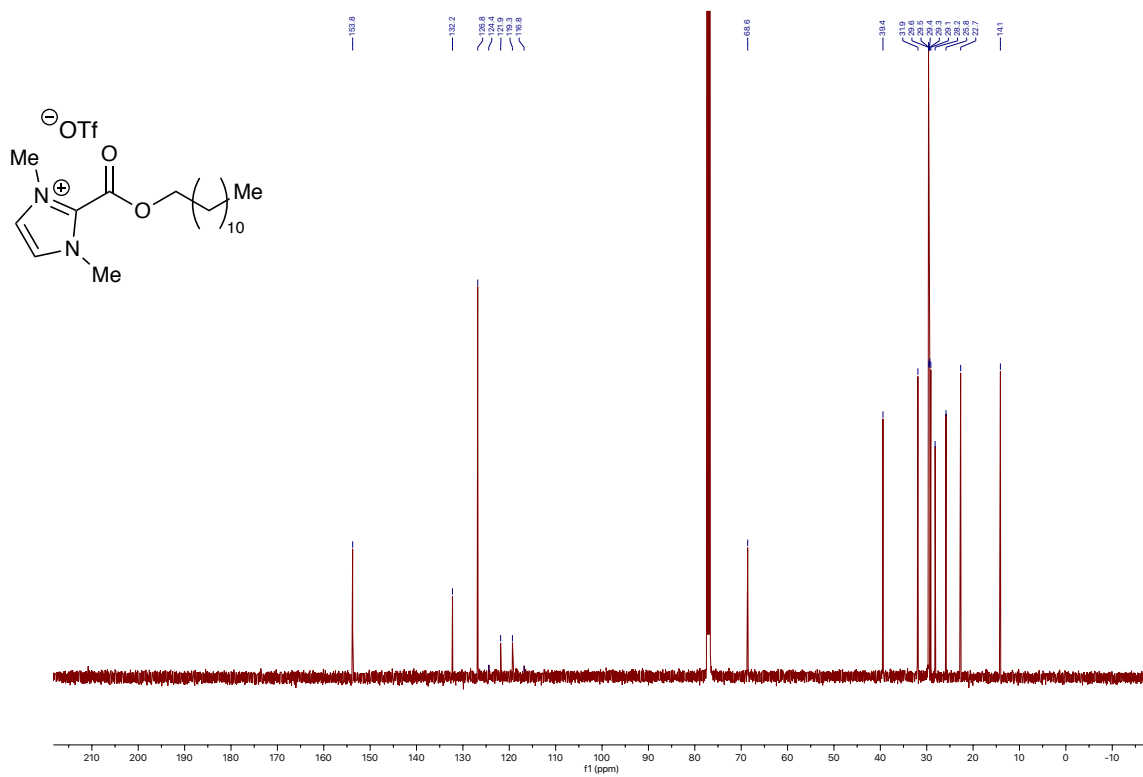

Supporting Information

$^1\text{H}$  NMR of **1e**

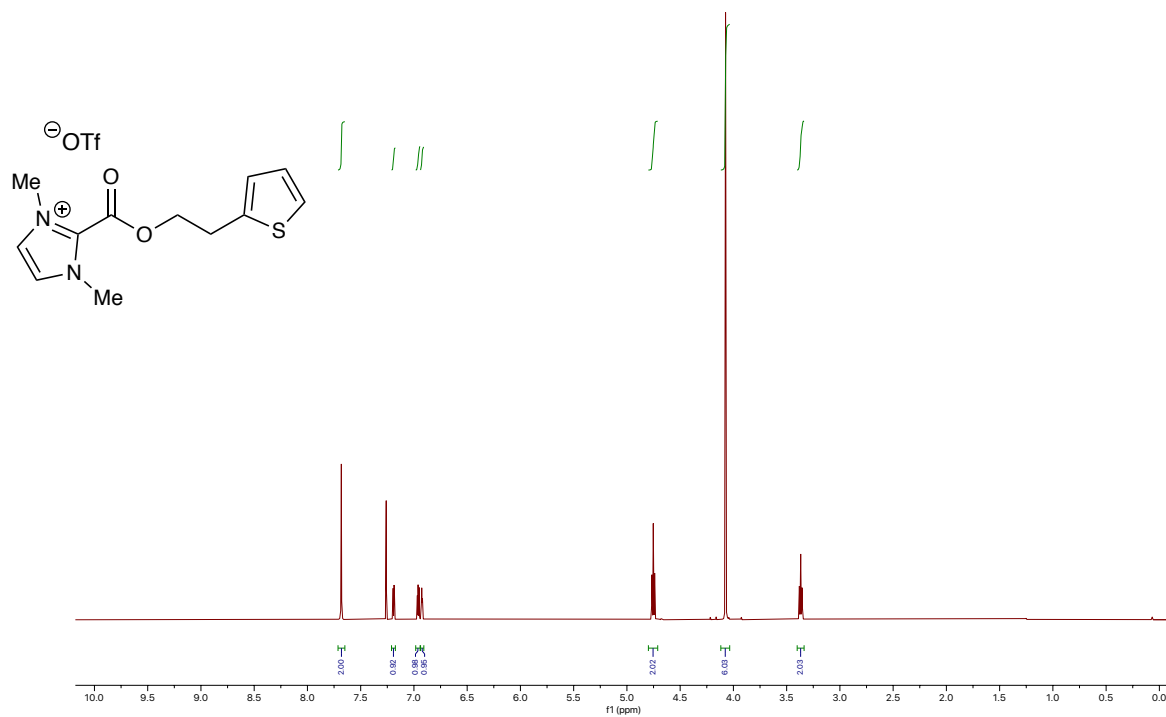

$^{13}\text{C}$  NMR of **1e**

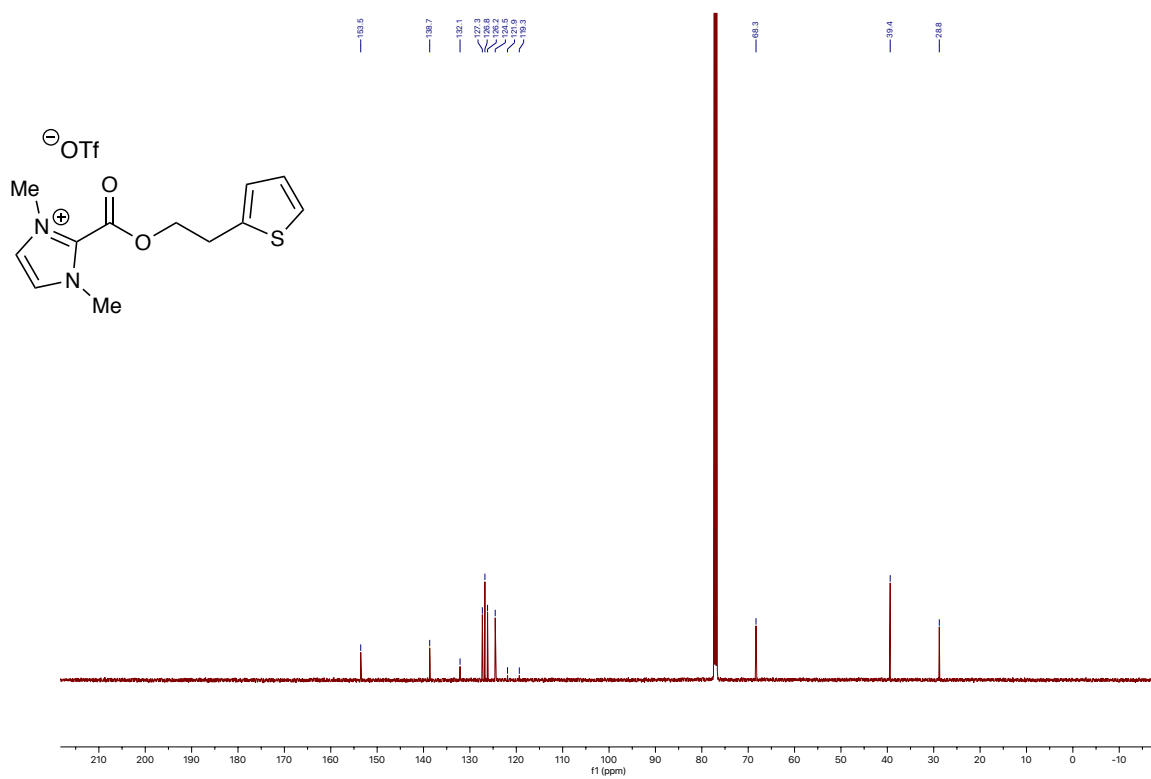



## Supporting Information

### <sup>1</sup>H NMR of **1f**

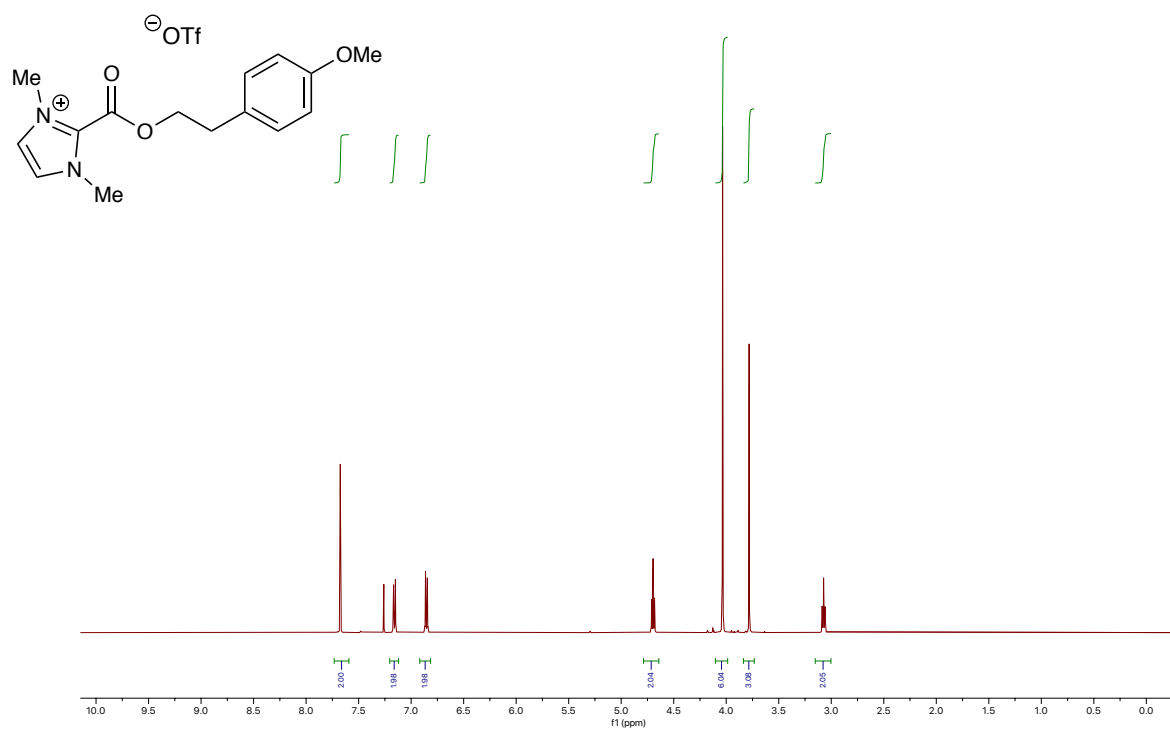

### <sup>13</sup>C NMR of **1f**

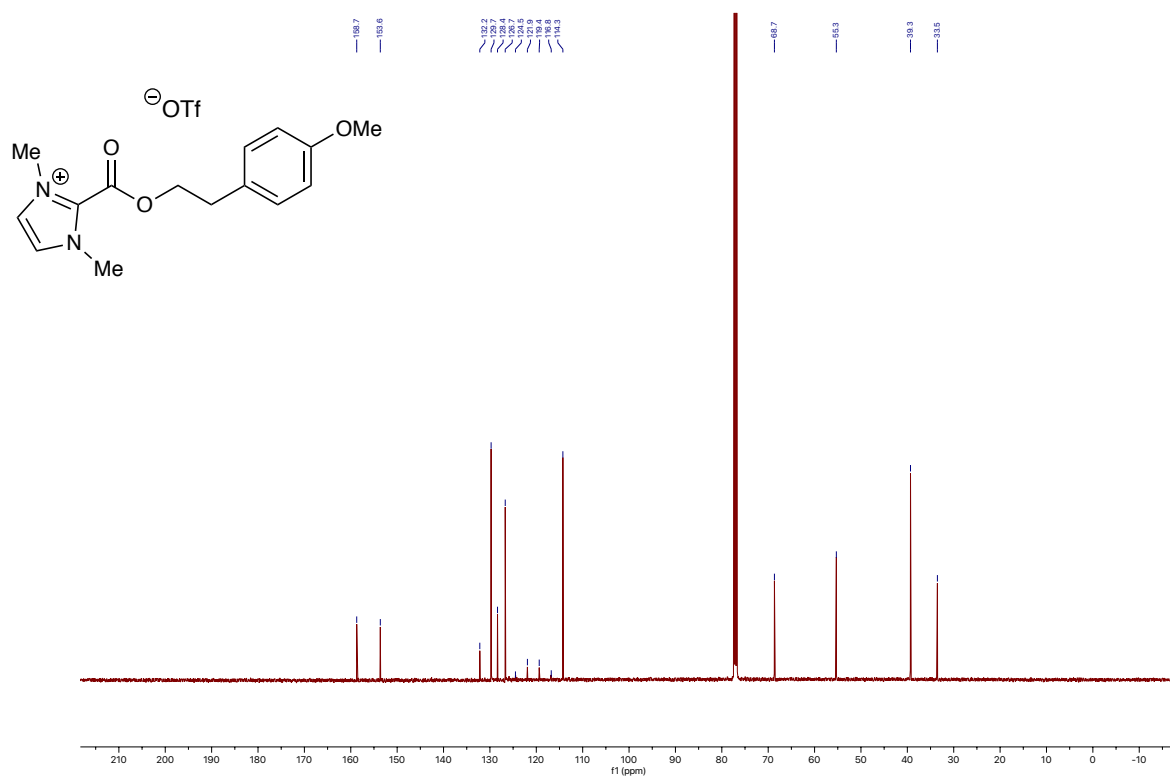

Supporting Information

$^1\text{H}$  NMR of **1g**

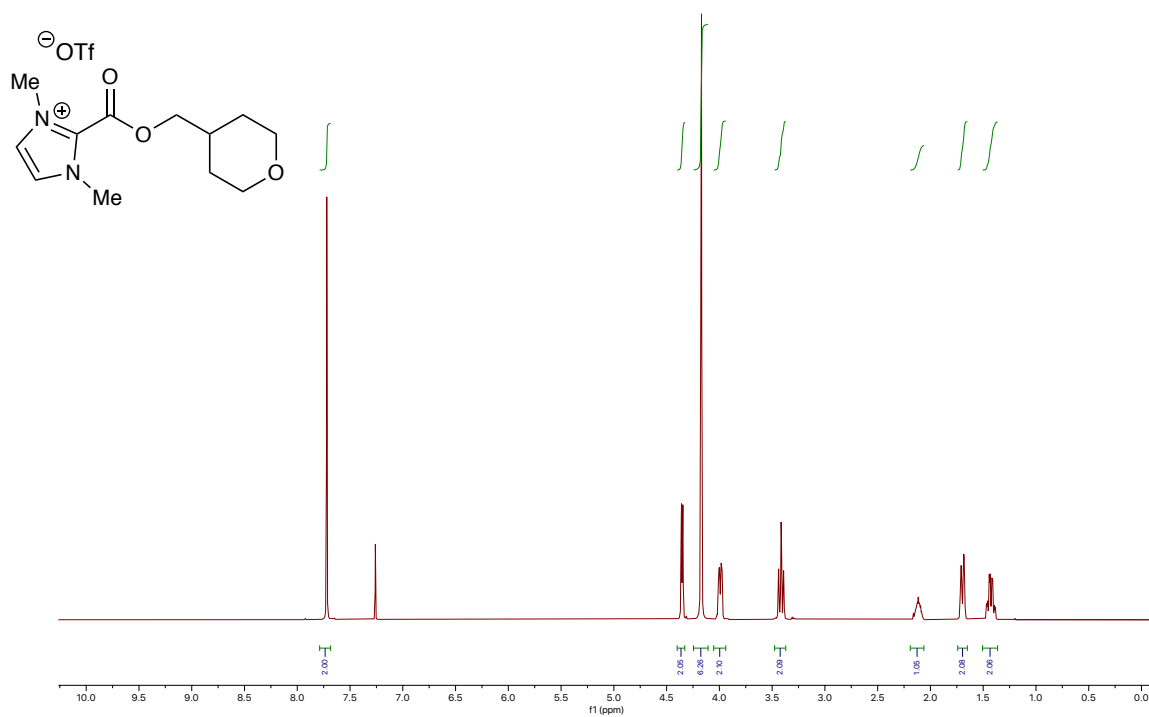

$^{13}\text{C}$  NMR of **1g**

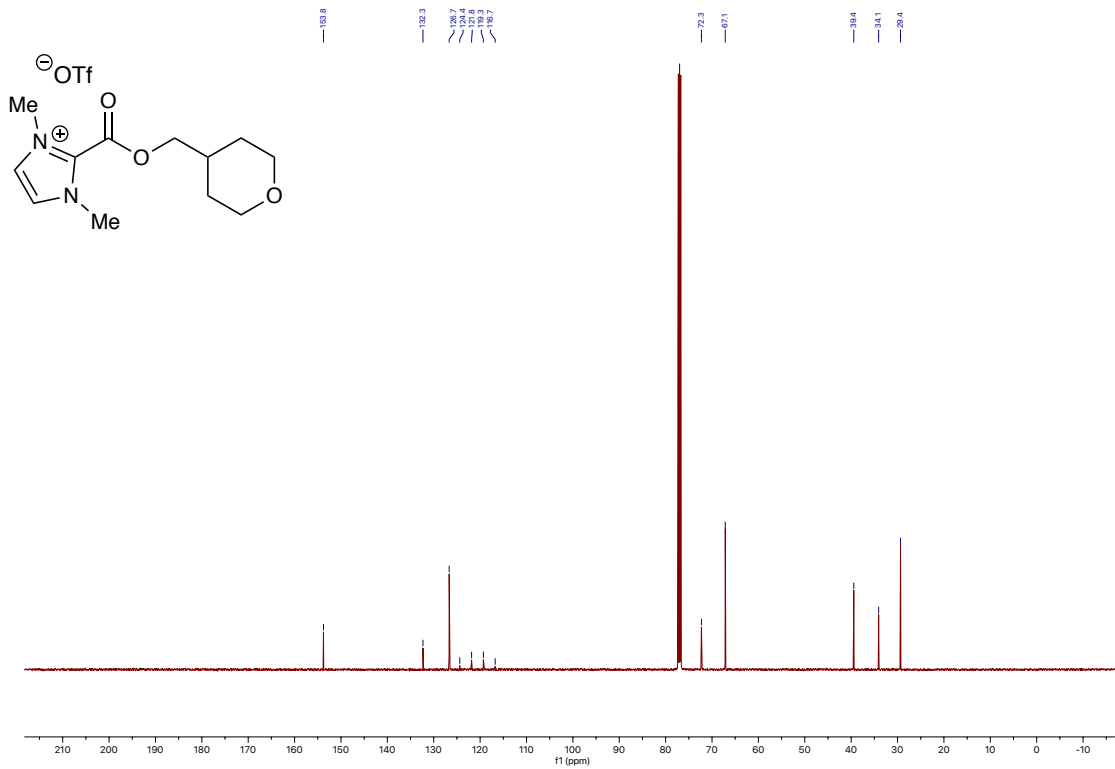

Supporting Information

$^1\text{H}$  NMR of **1h**

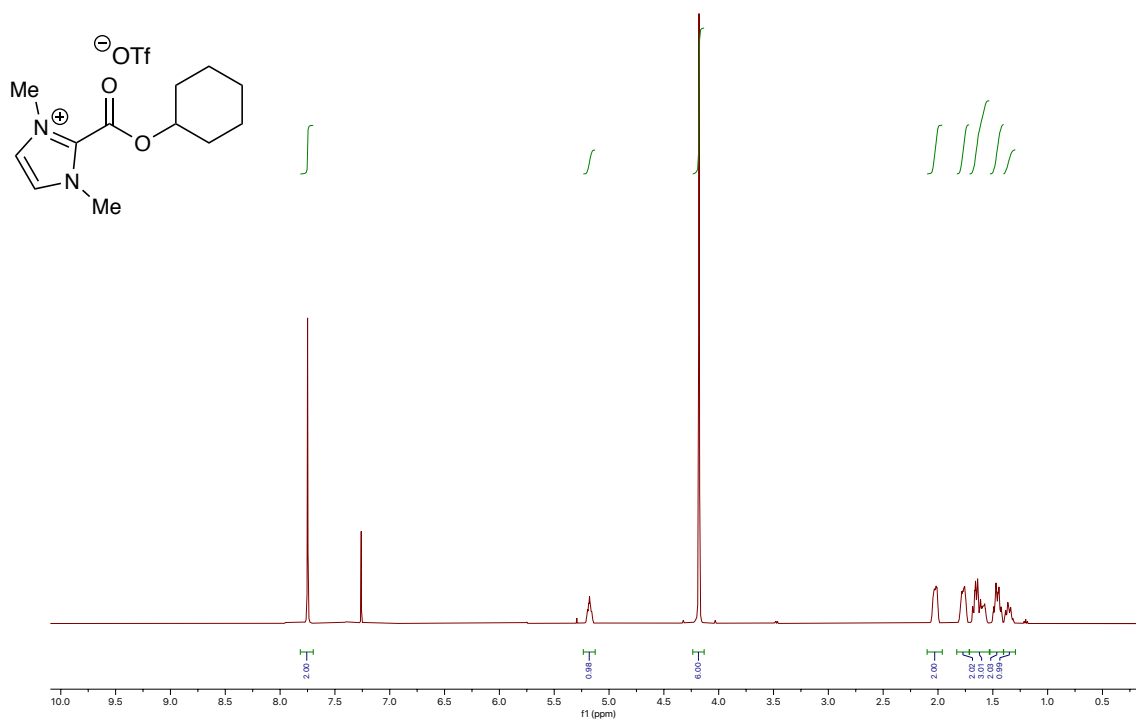

$^{13}\text{C}$  NMR of **1h**

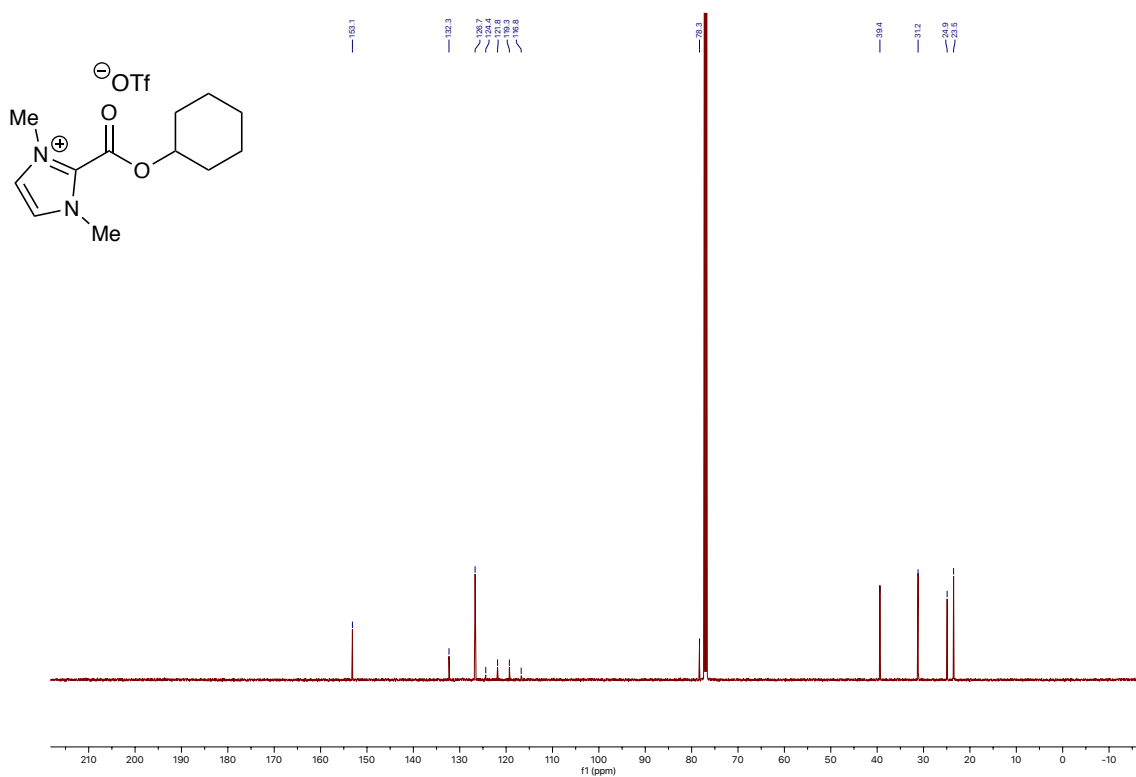

Supporting Information

$^1\text{H}$  NMR of **1i**

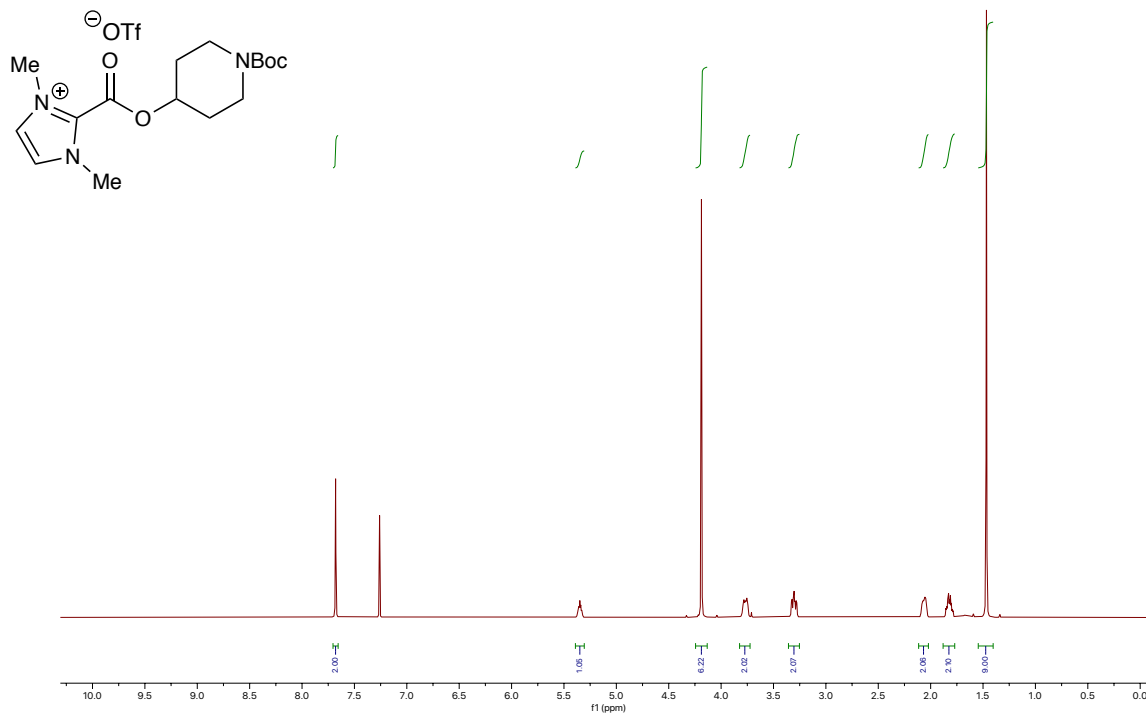

$^{13}\text{C}$  NMR of **1i**

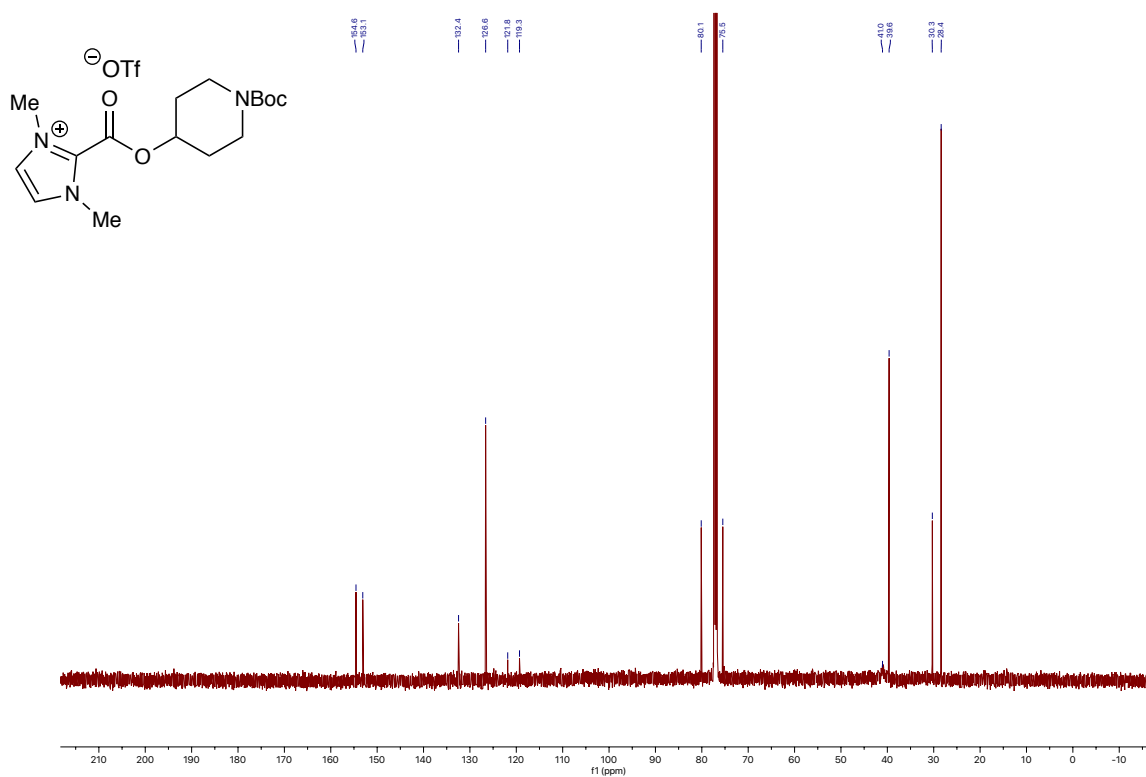

Supporting Information

<sup>1</sup>H NMR of **1j**

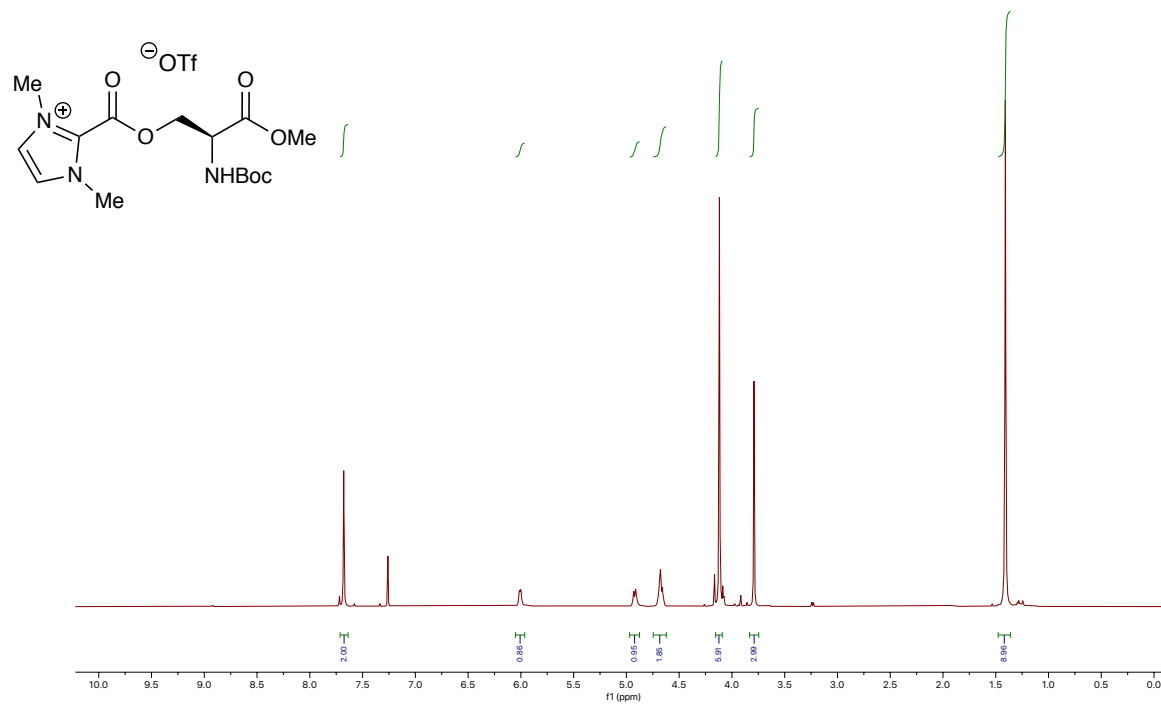

<sup>13</sup>C NMR of **1j**

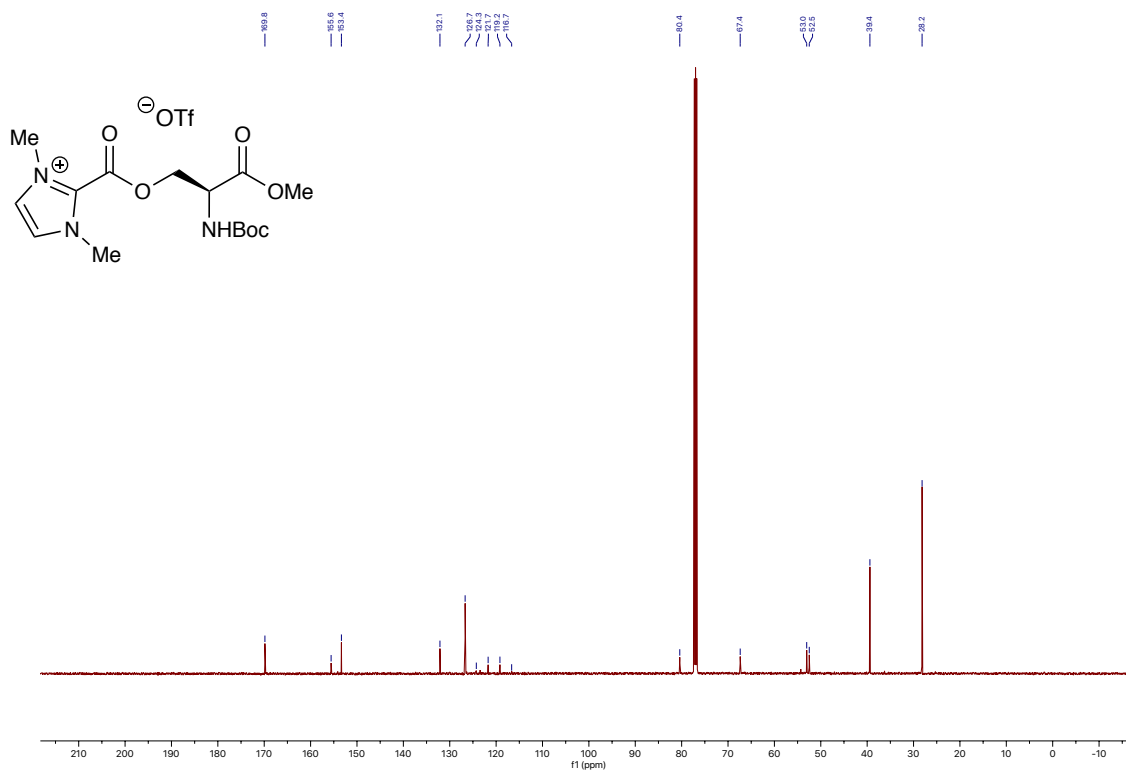

Supporting Information

$^1\text{H}$  NMR of **1k**

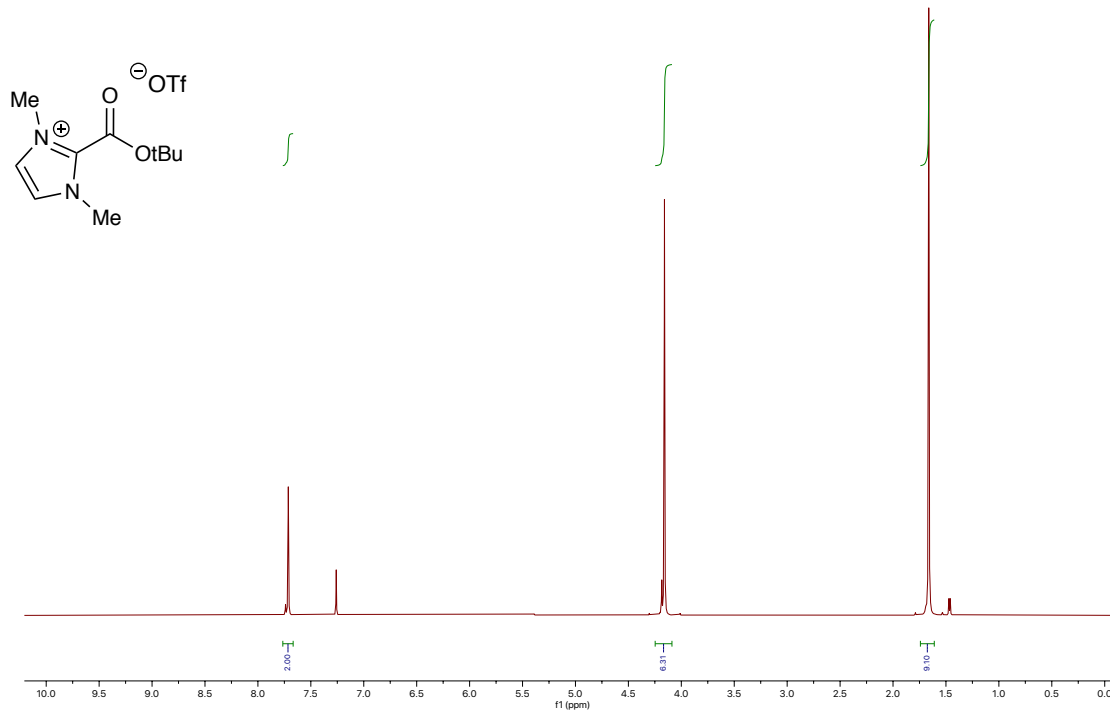

$^{13}\text{C}$  NMR of **1k**

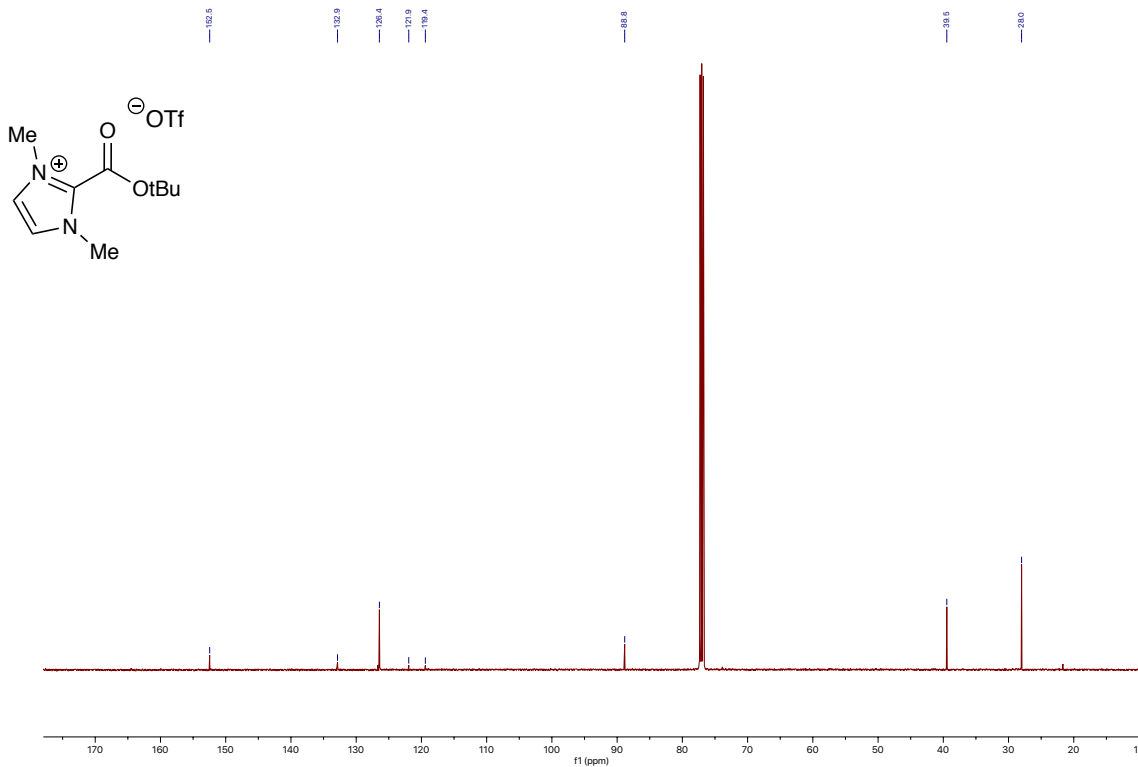

Supporting Information

$^1\text{H}$  NMR of **11**

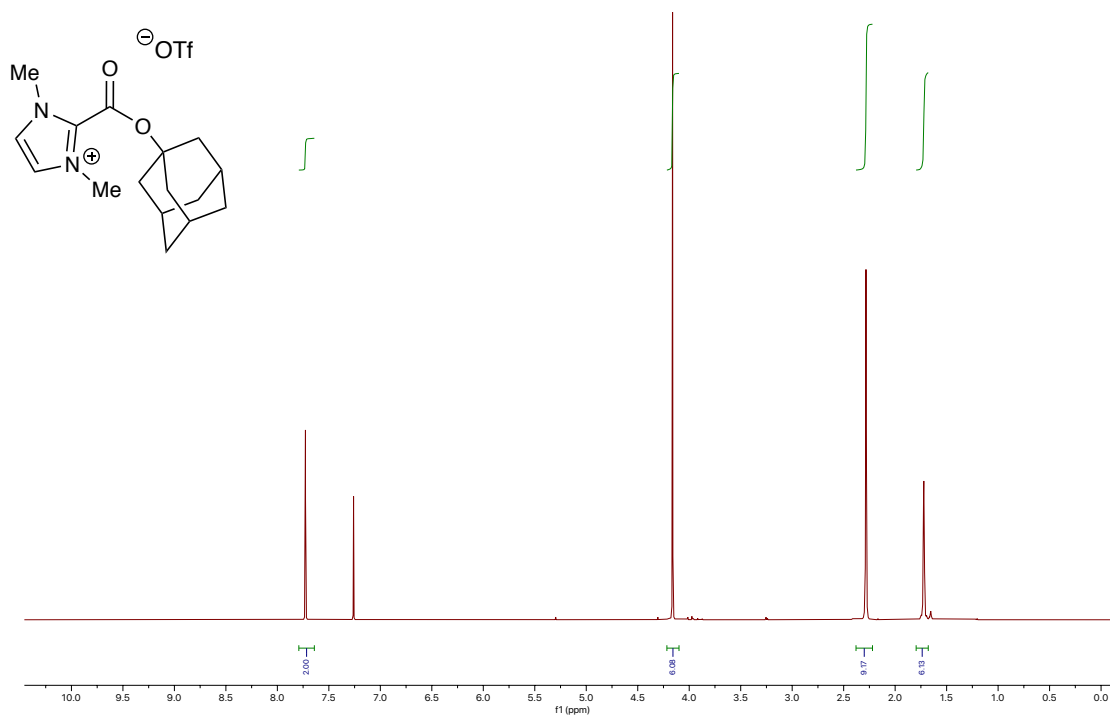

$^{13}\text{C}$  NMR of **11**

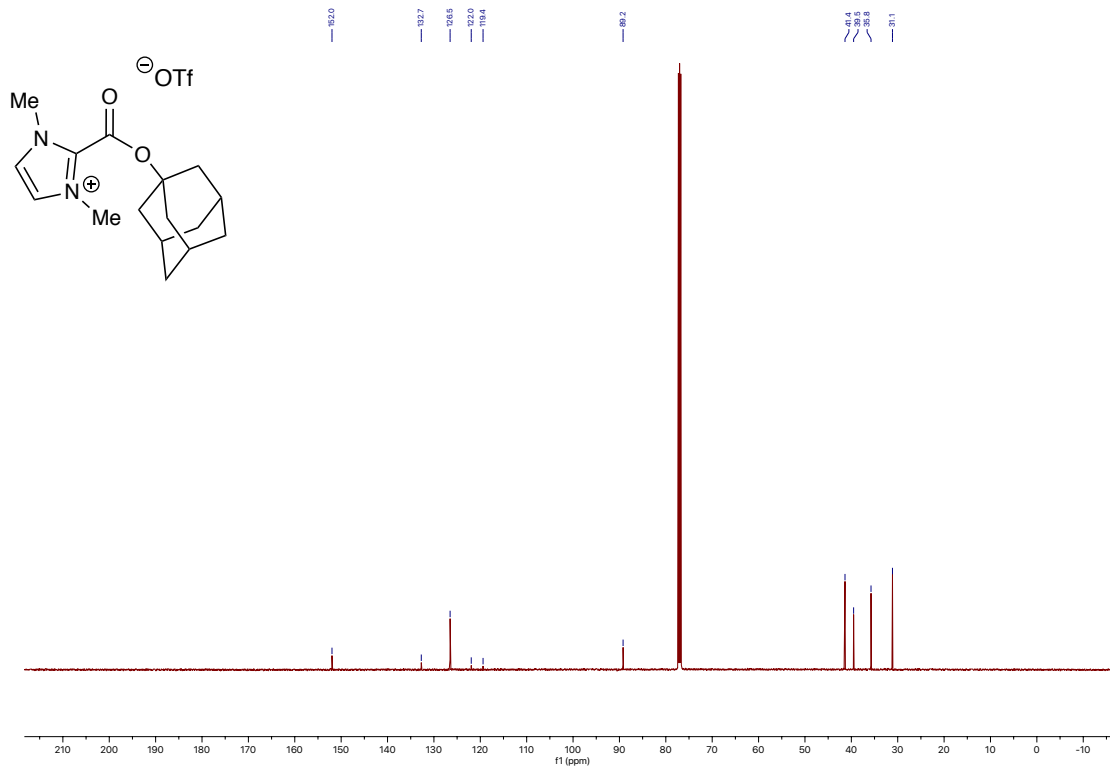

Supporting Information

$^1\text{H}$  NMR of **1m**

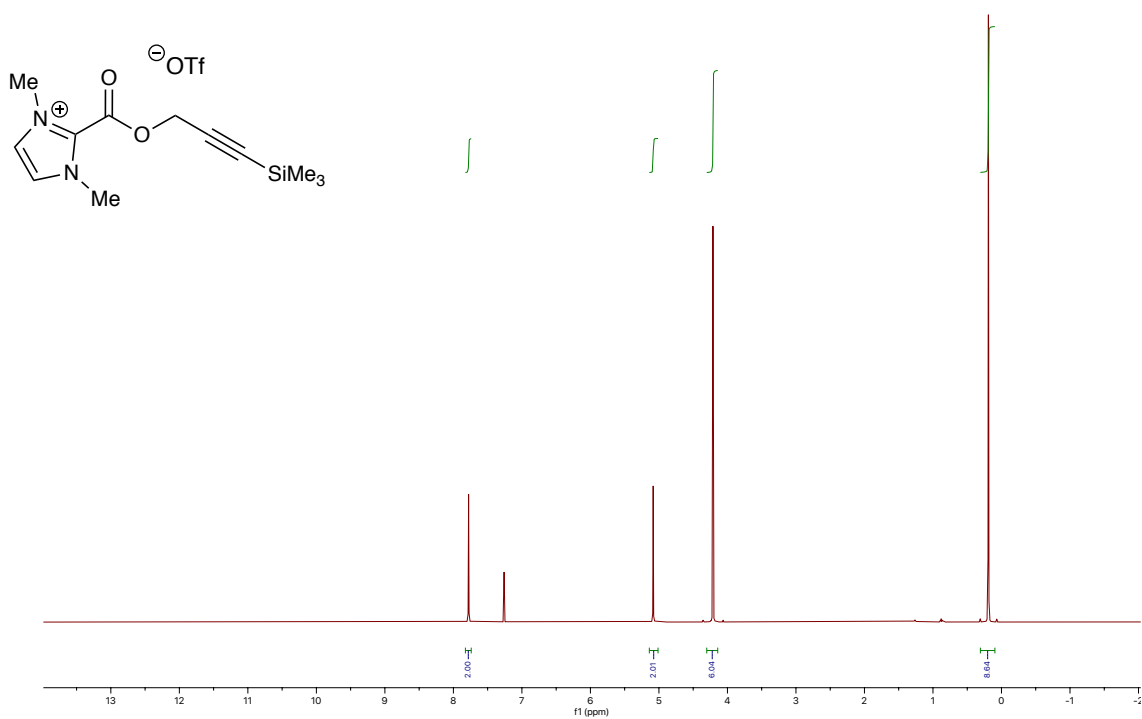

$^{13}\text{C}$  NMR of **1m**

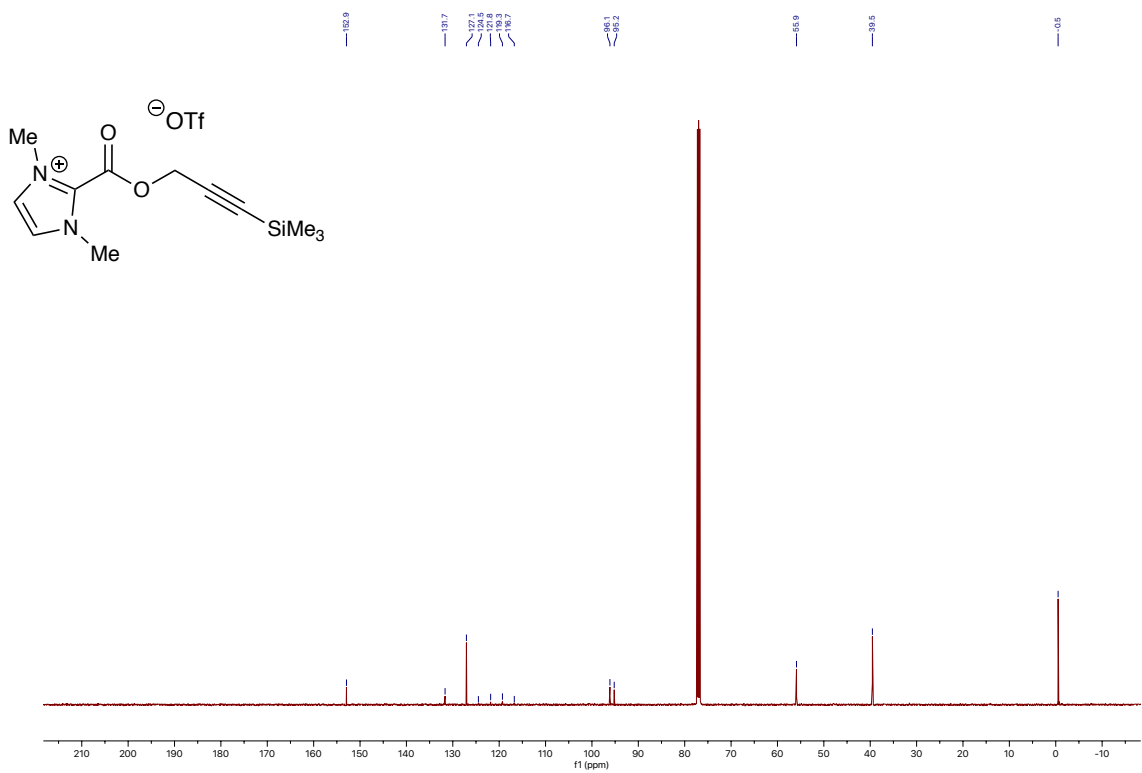



Supporting Information

$^1\text{H}$  NMR of **1n**

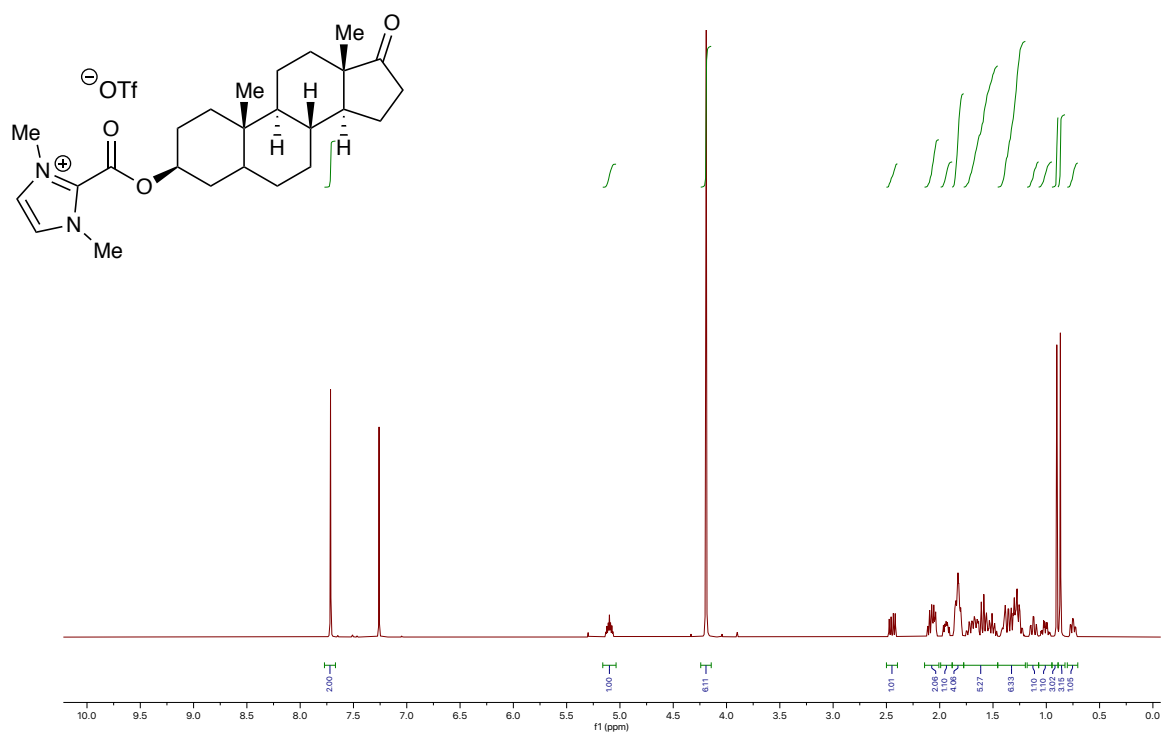

$^{13}\text{C}$  NMR of **1n**

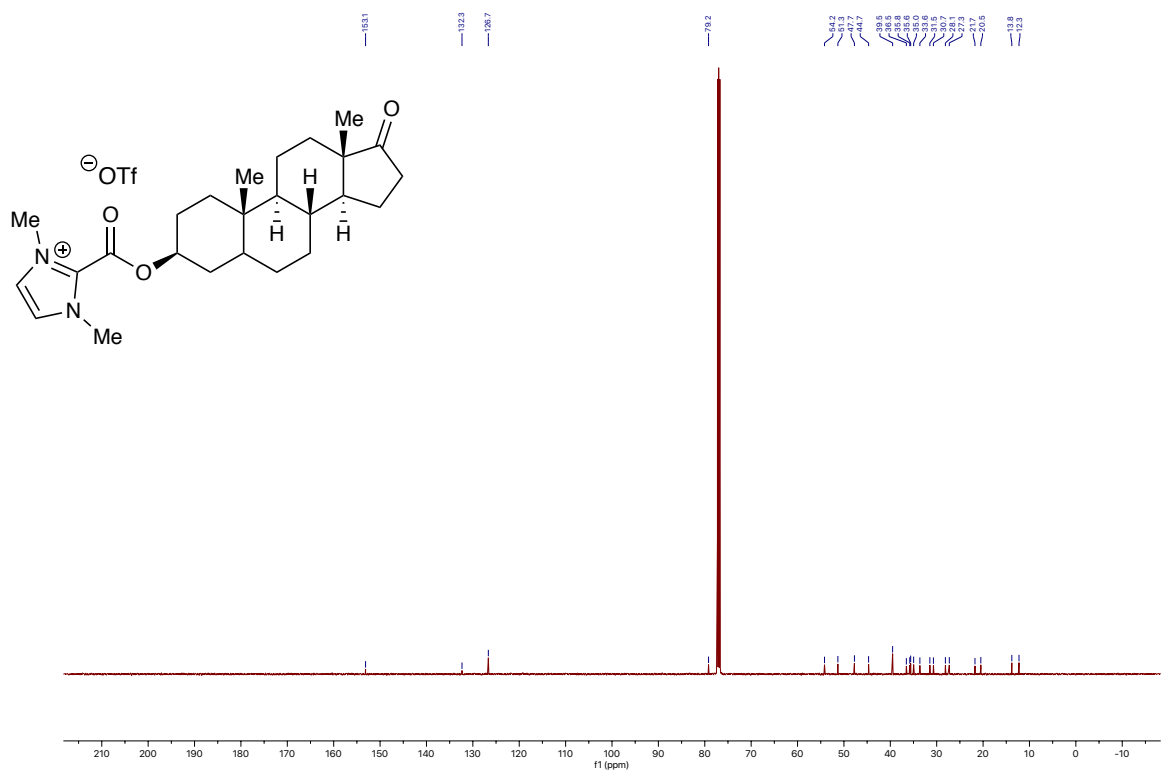

## Supporting Information

### $^1\text{H}$ NMR of **1o**

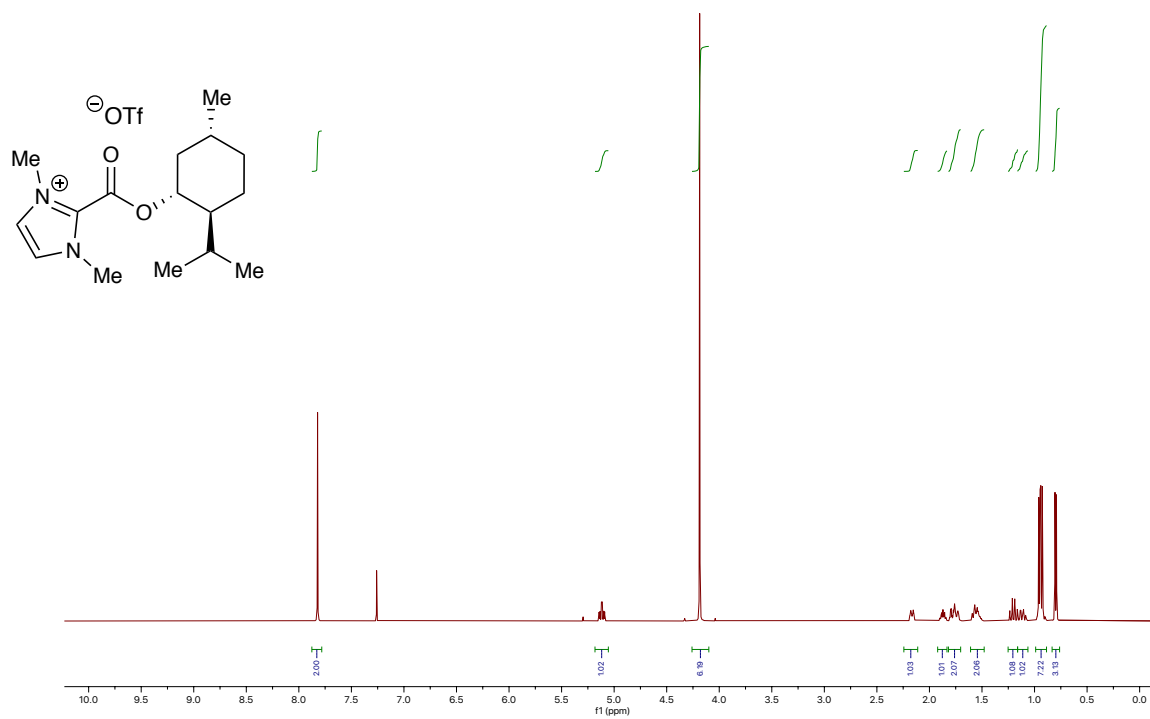

### $^{13}\text{C}$ NMR of **1o**

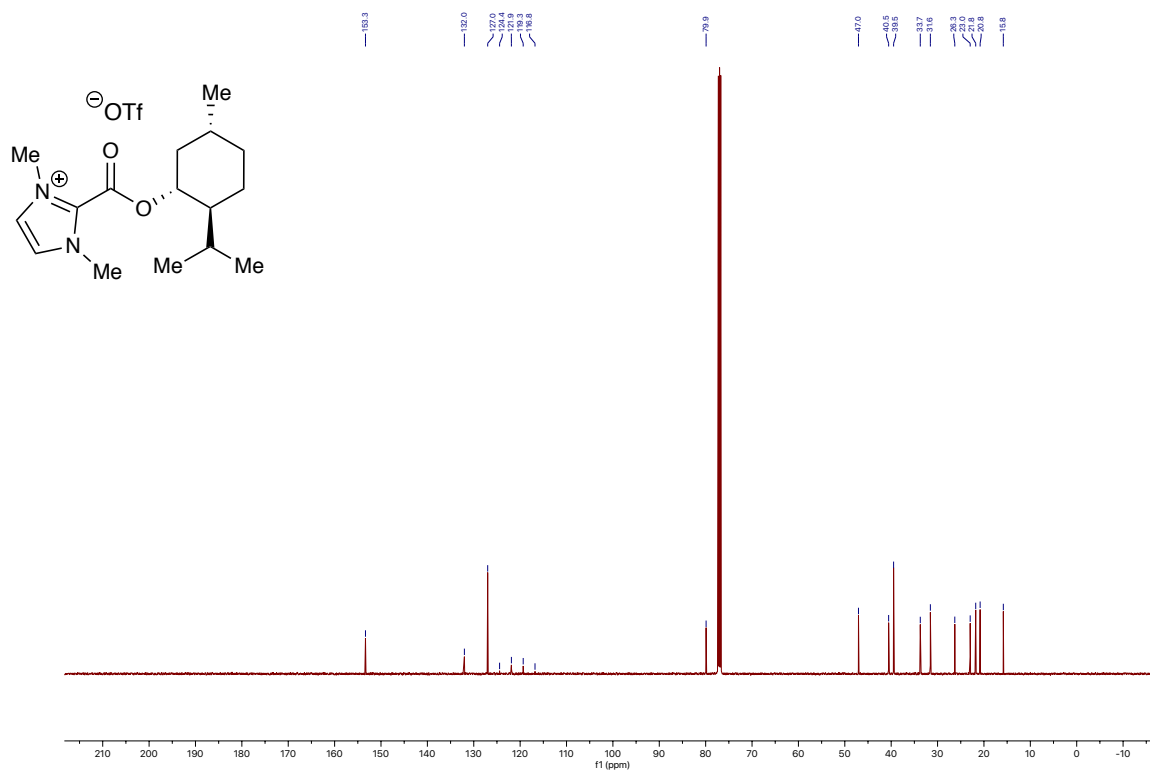

Supporting Information

$^1\text{H}$  NMR of **2a**

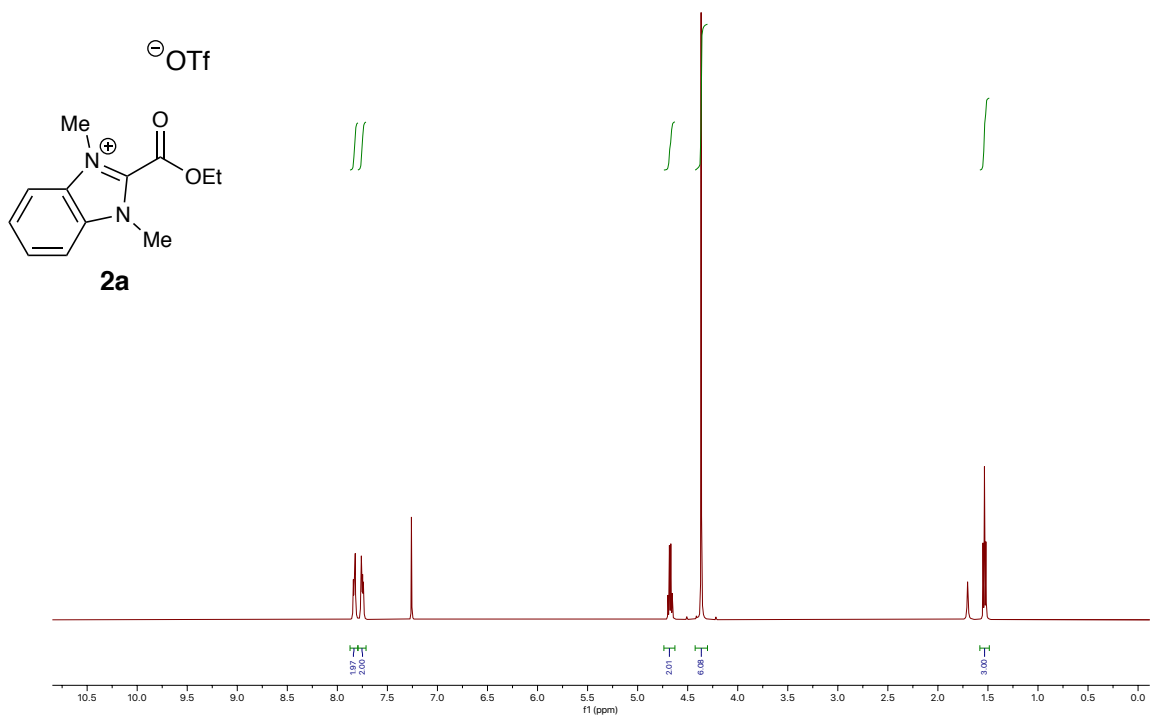

$^{13}\text{C}$  NMR of **2a**

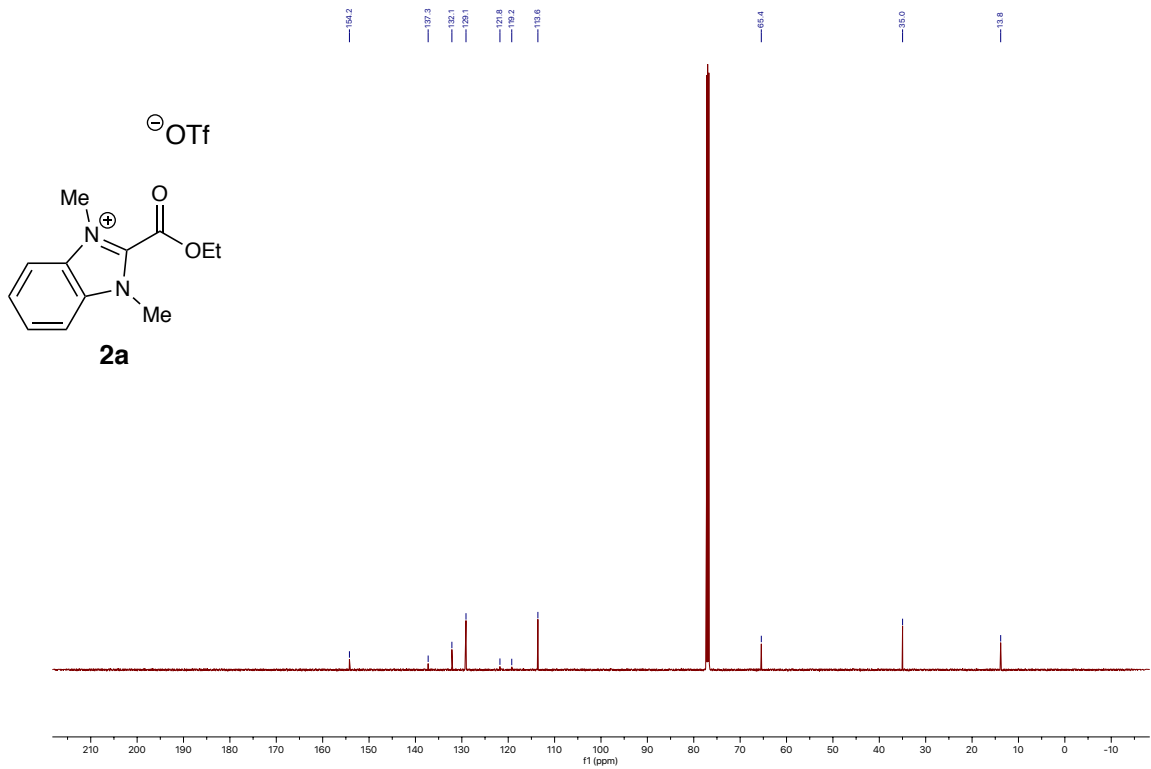

Supporting Information

$^1\text{H}$  NMR of **4k**

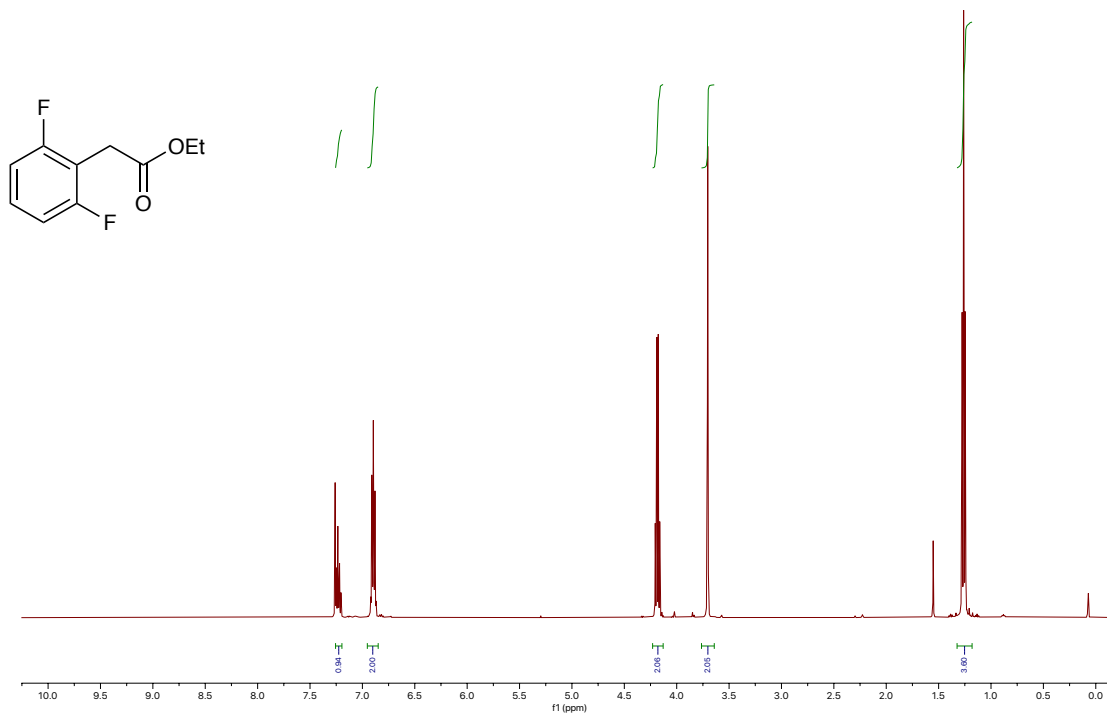

$^{13}\text{C}$  NMR of **4k**

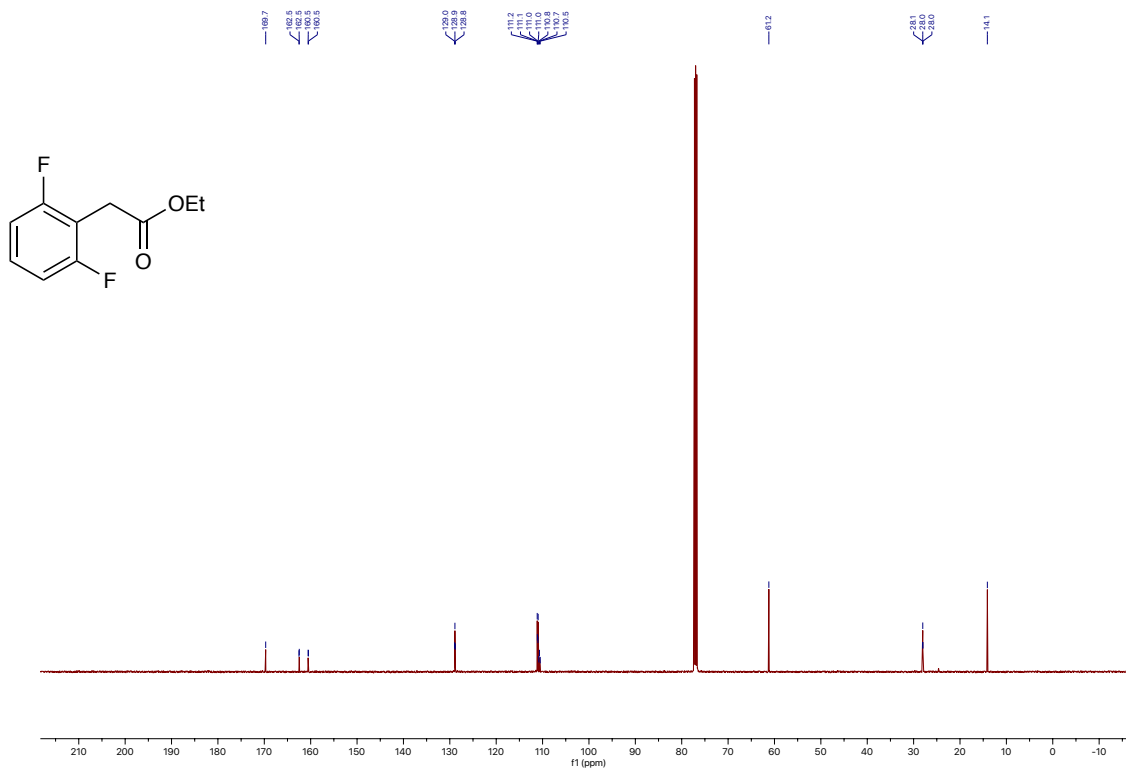

Supporting Information

$^{19}\text{F}$  NMR of **4k**

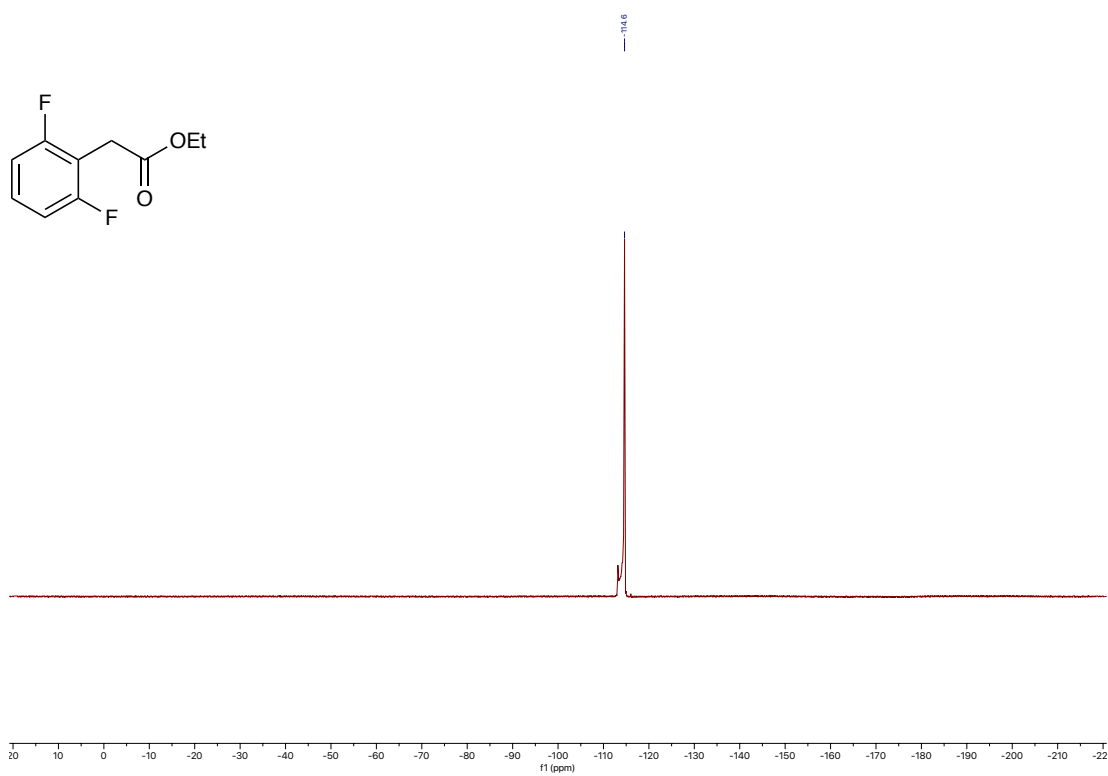

Supporting Information

$^1\text{H}$  NMR of **4o**

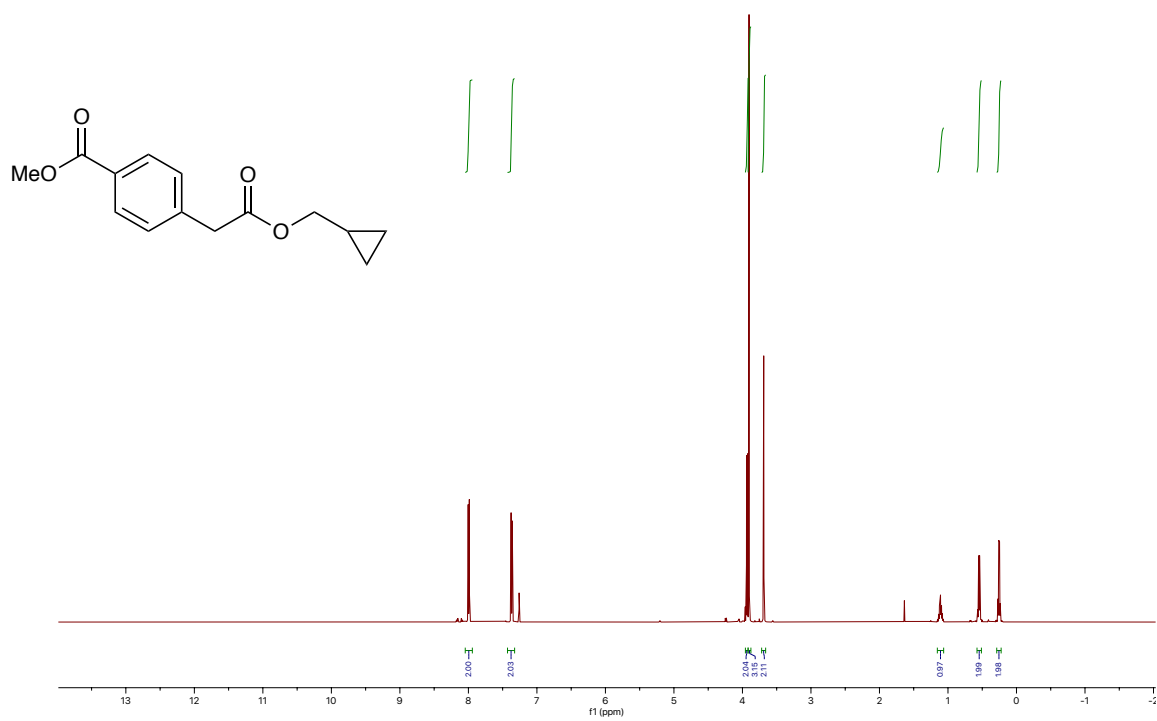

$^{13}\text{C}$  NMR of **4o**

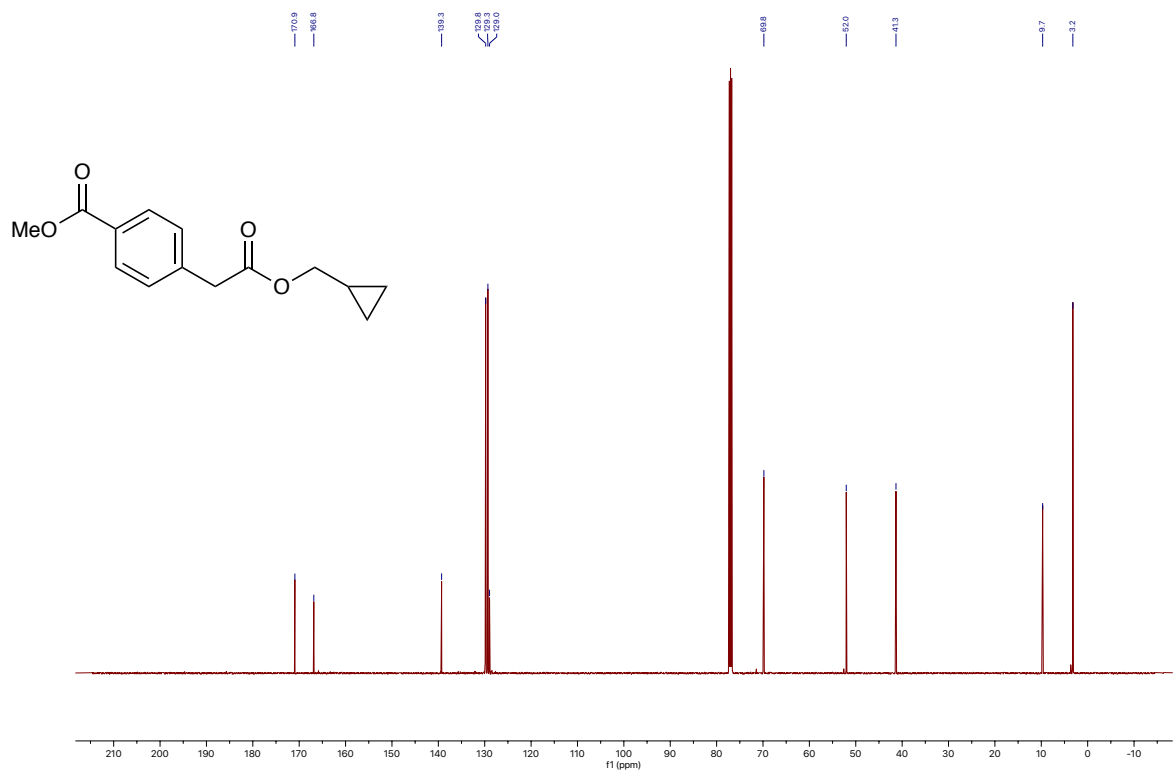

## Supporting Information

### $^1\text{H}$ NMR of **4p**

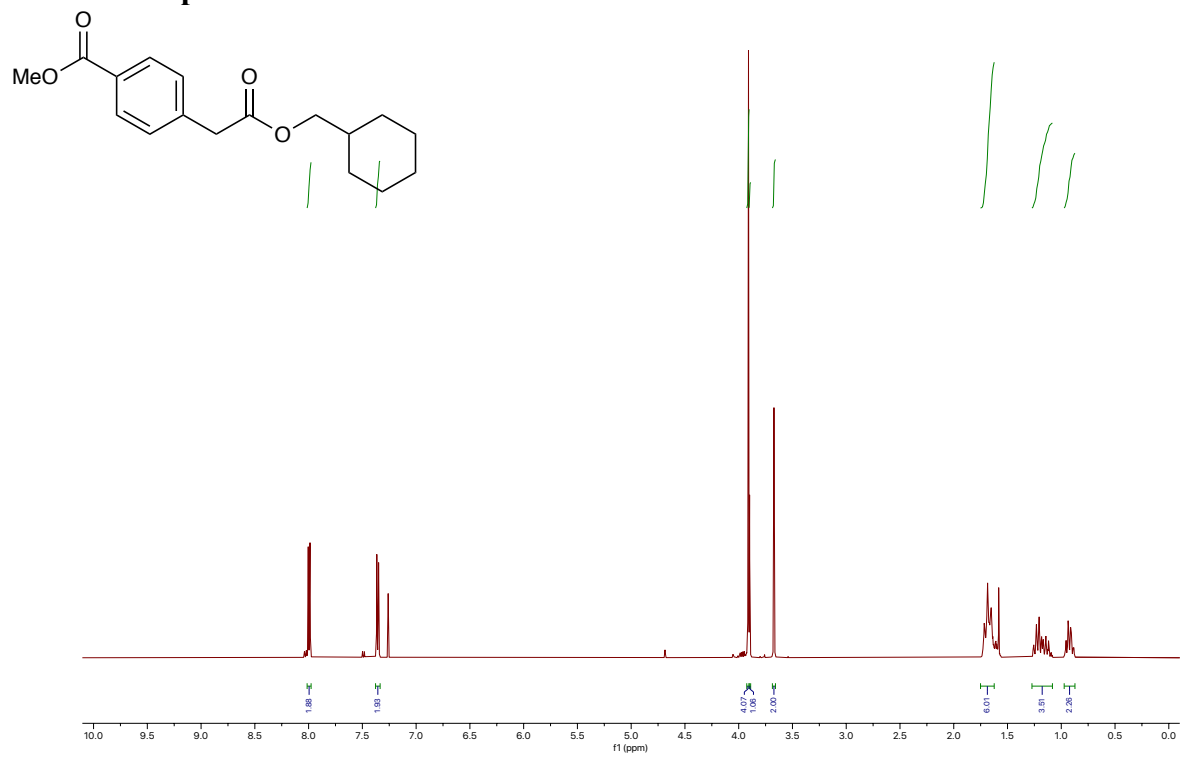

### $^{13}\text{C}$ NMR of **4p**

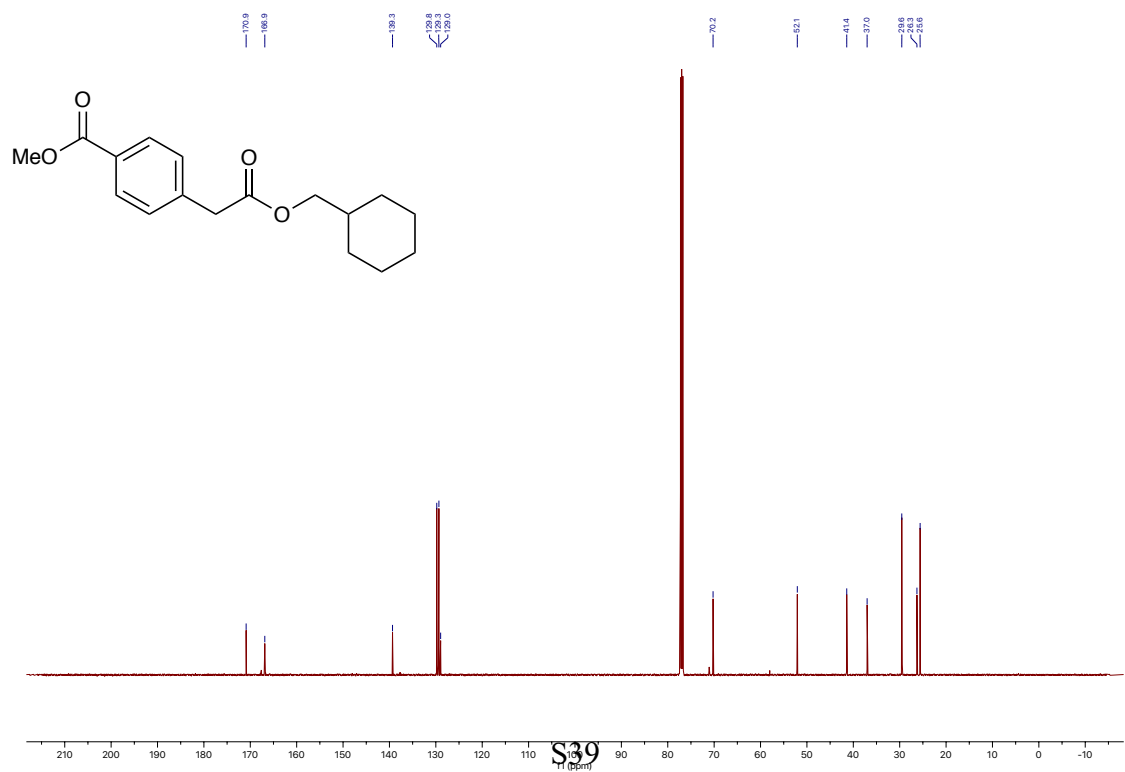

Supporting Information

<sup>1</sup>H NMR of **4q**

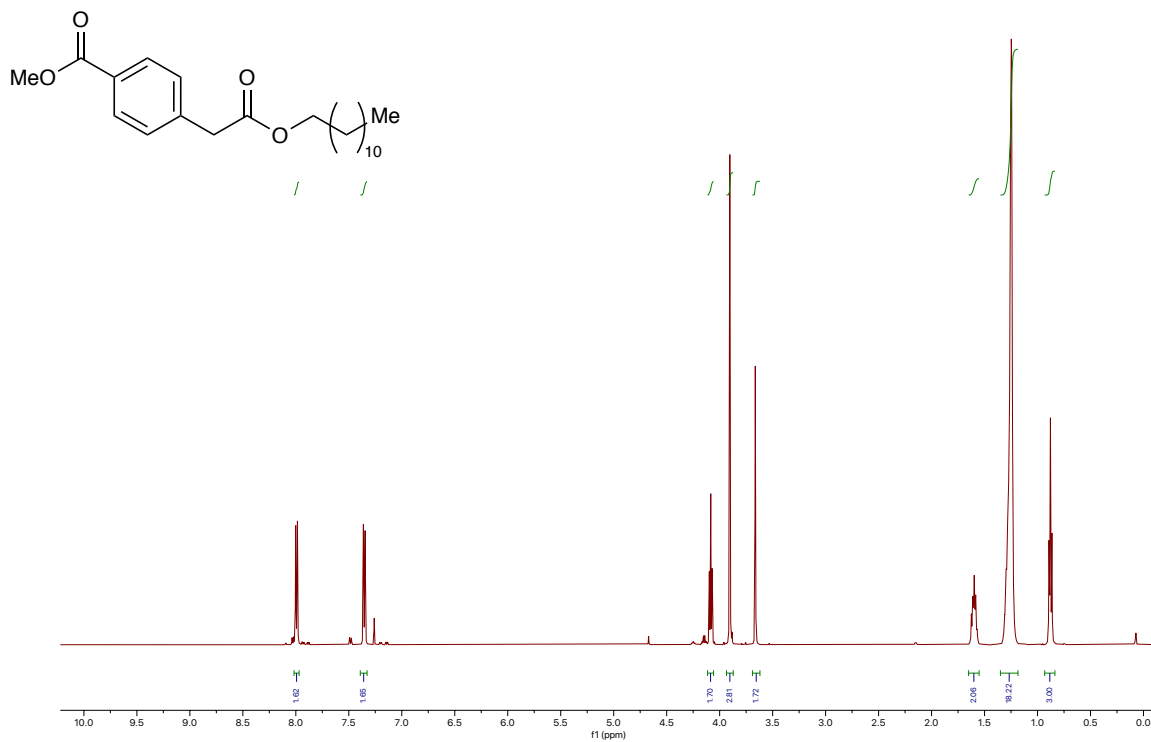

<sup>13</sup>C NMR of **4q**

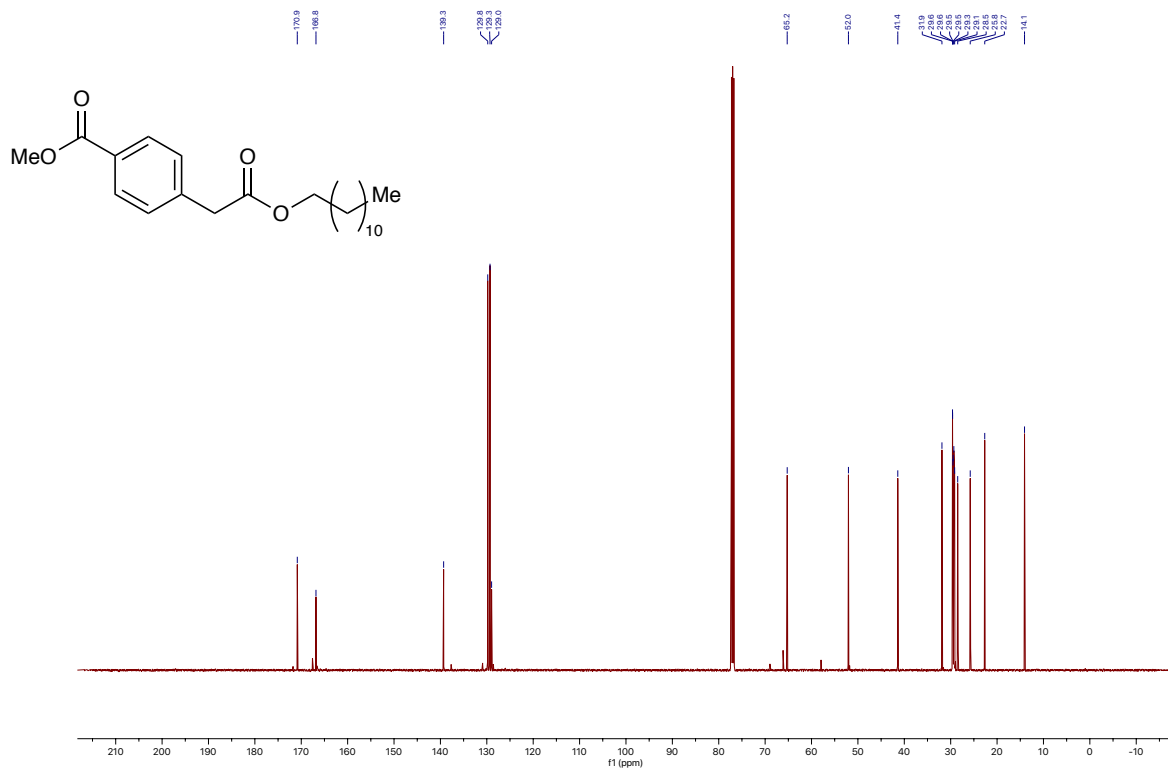



Supporting Information

$^1\text{H}$  NMR of **4r**

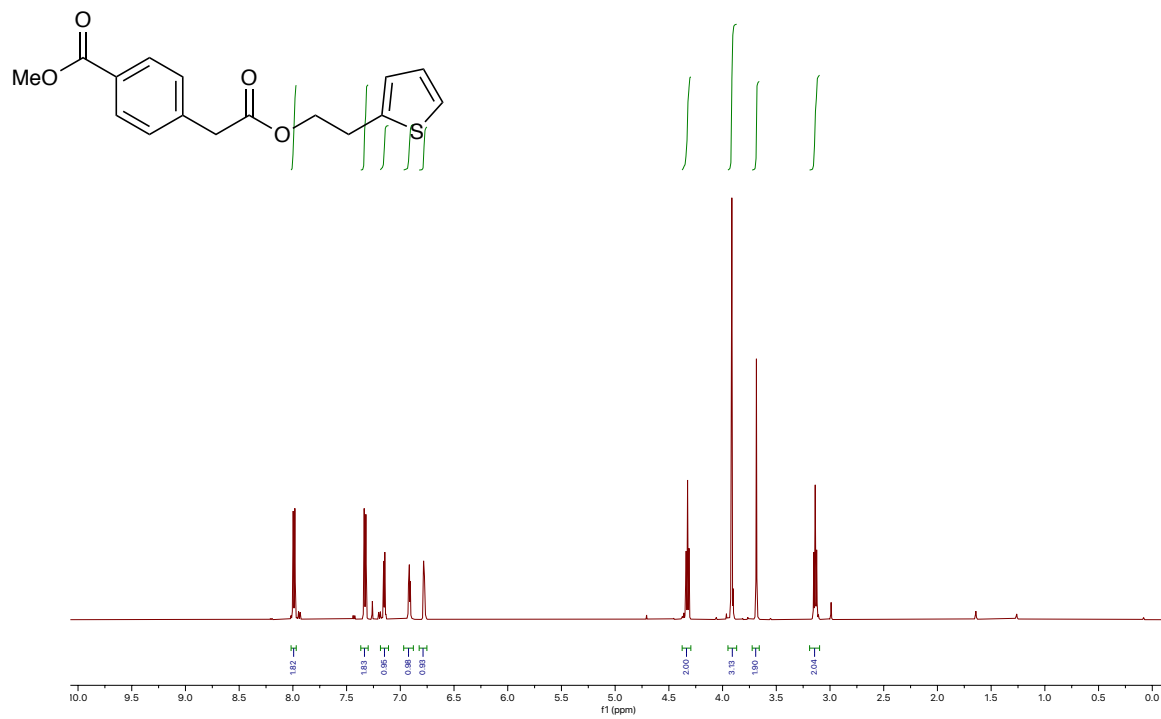

$^{13}\text{C}$  NMR of **4r**

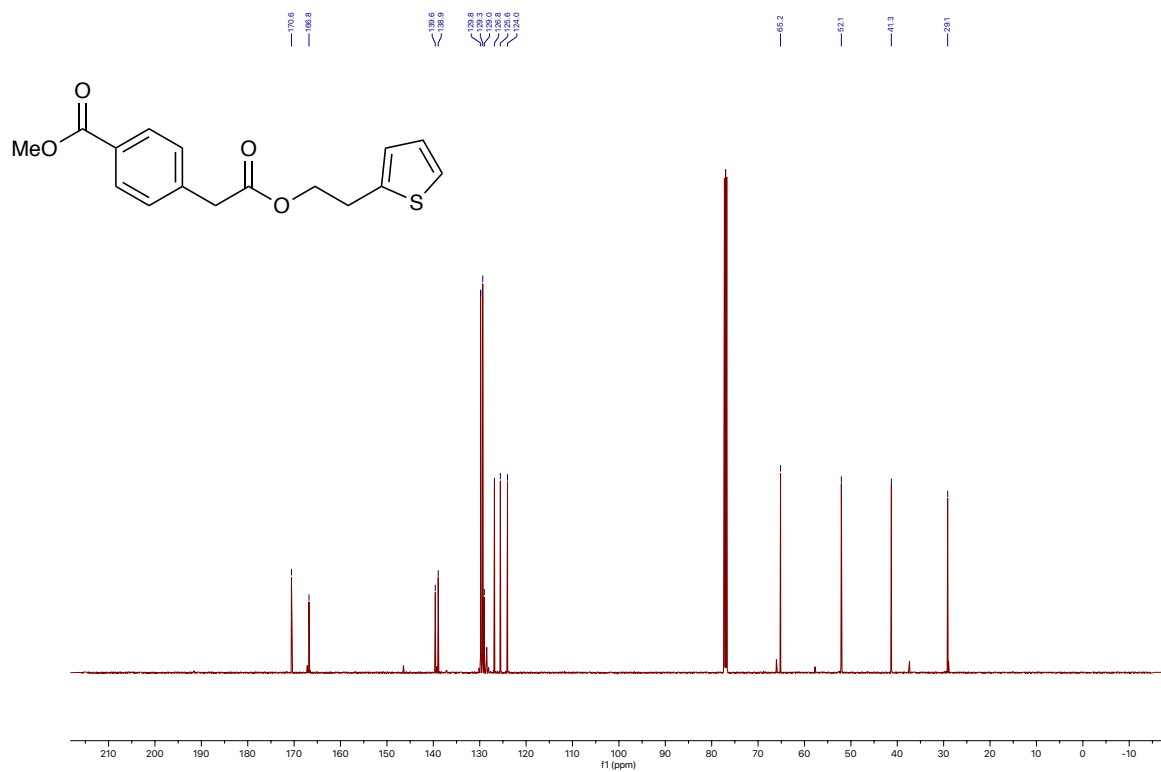

# Supporting Information

## <sup>1</sup>H NMR of 4s

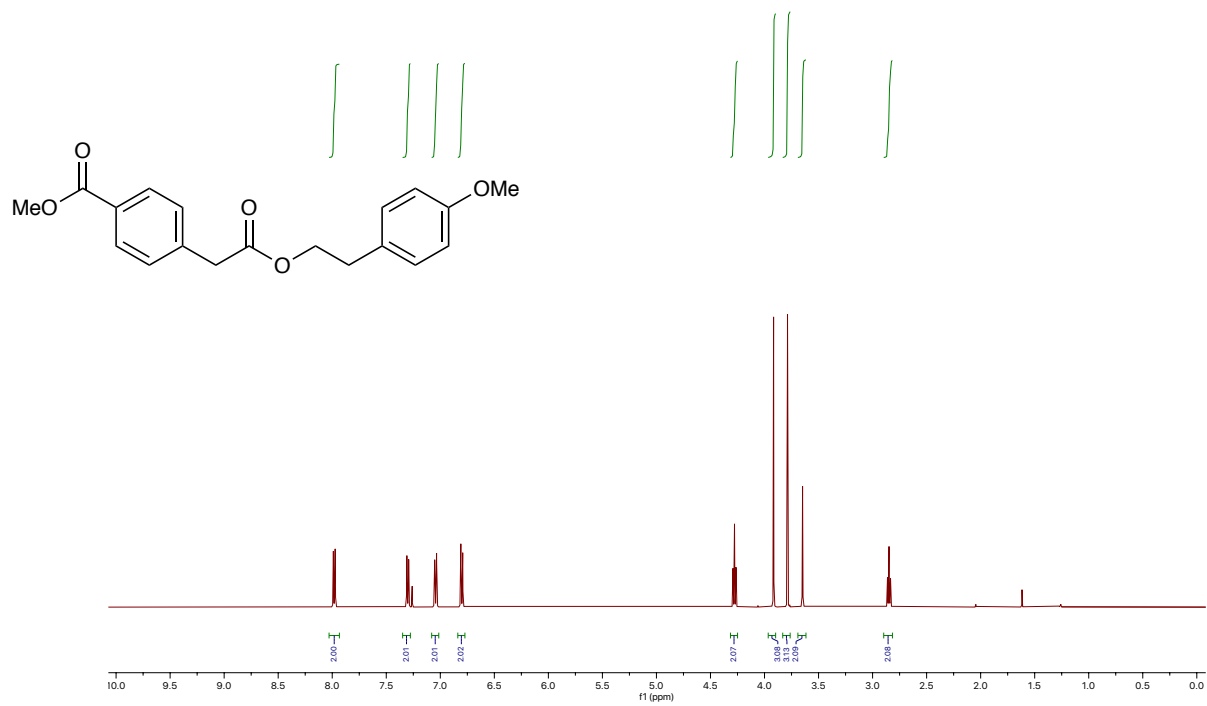

## <sup>13</sup>C NMR of 4s

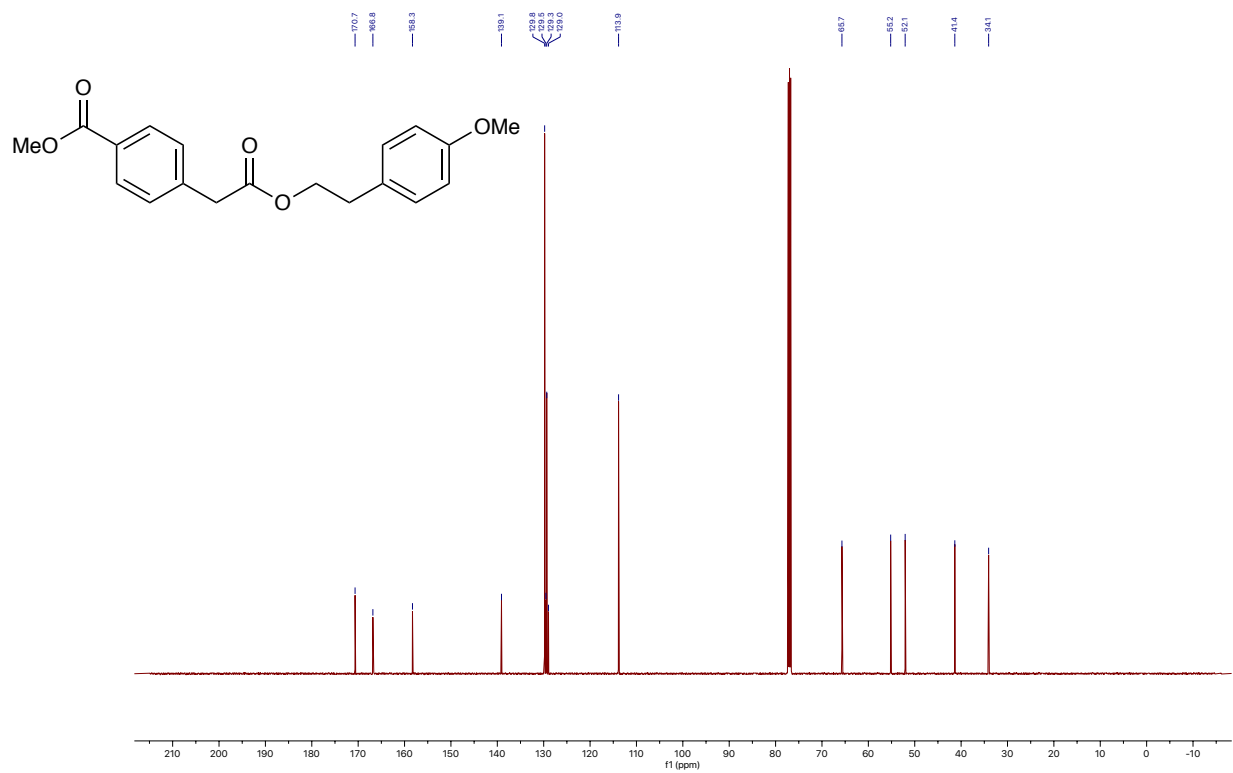

Supporting Information

$^1\text{H}$  NMR of **4t**

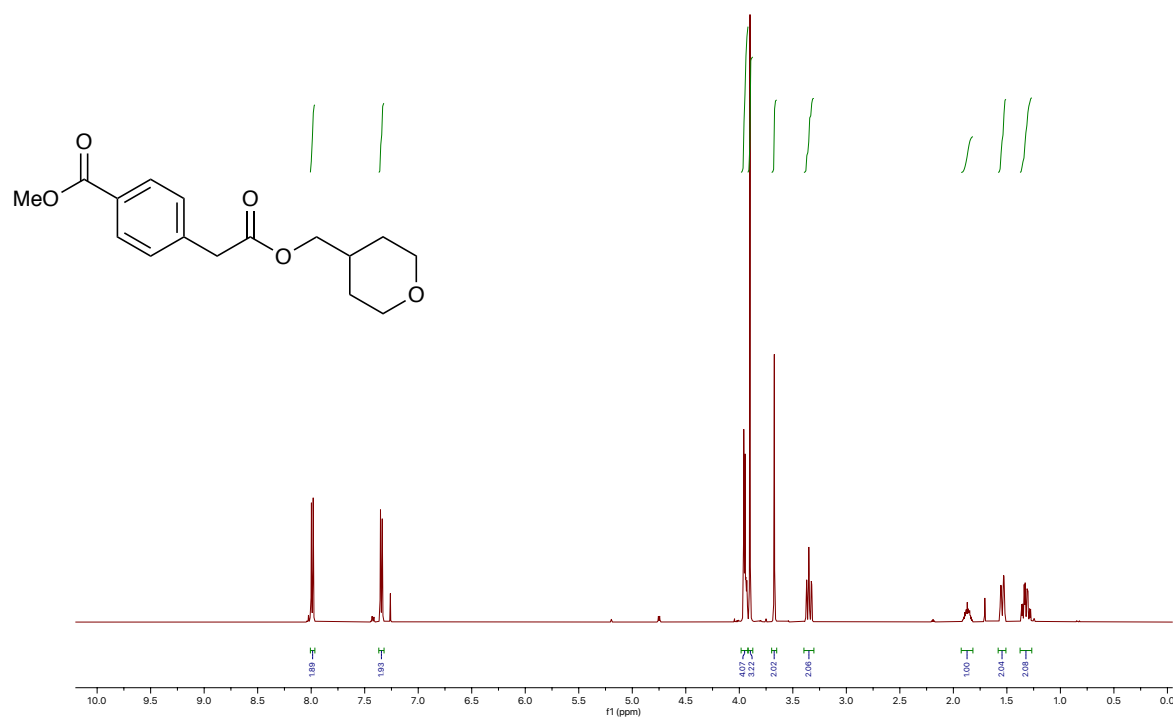

$^{13}\text{C}$  NMR of **4t**

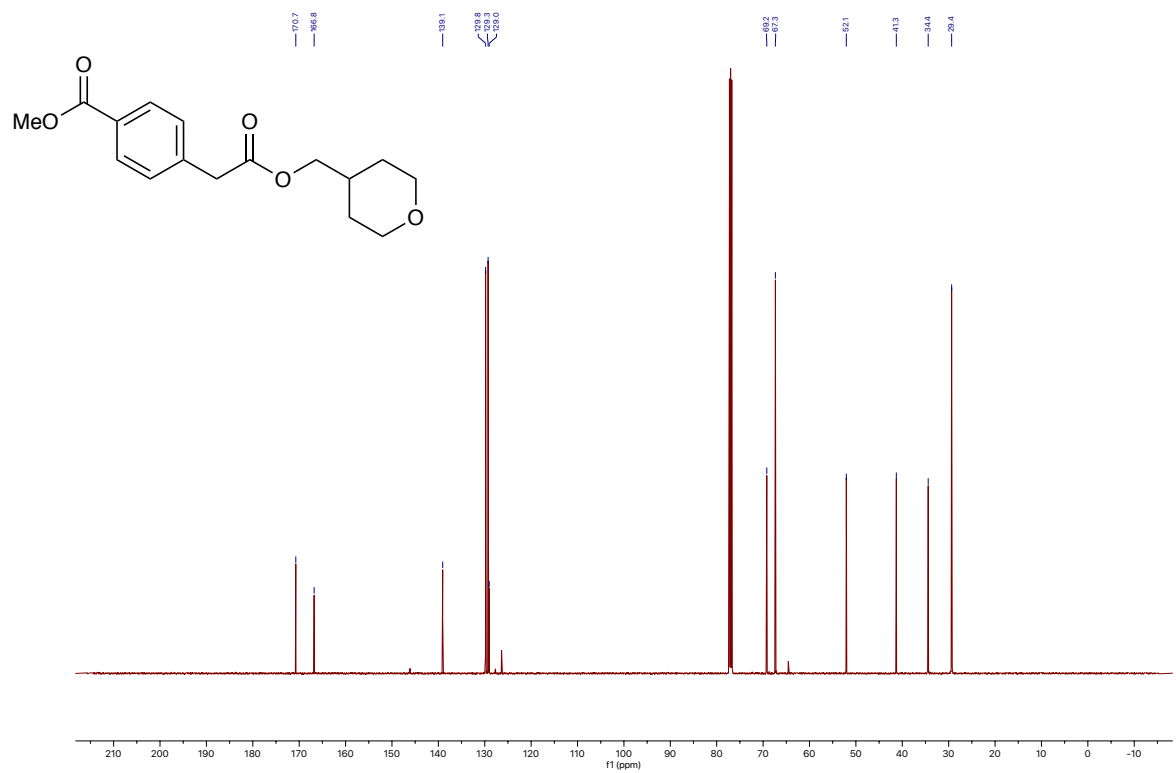

Supporting Information

$^1\text{H}$  NMR of **4u**

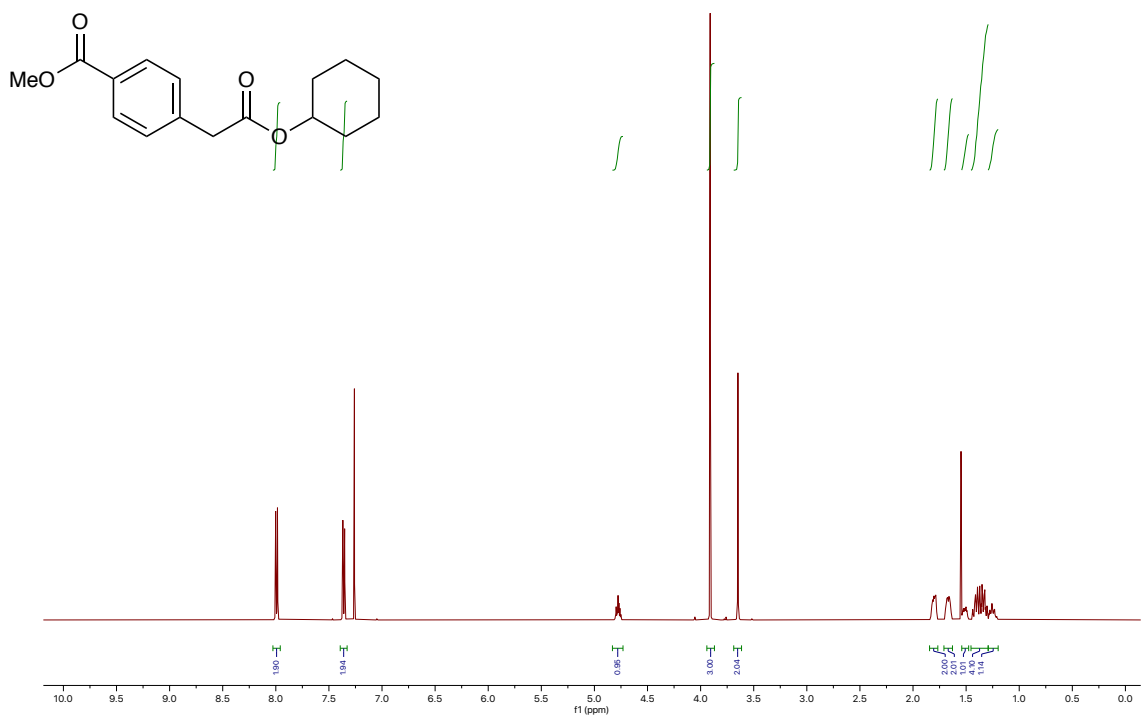

$^{13}\text{C}$  NMR of **4u**

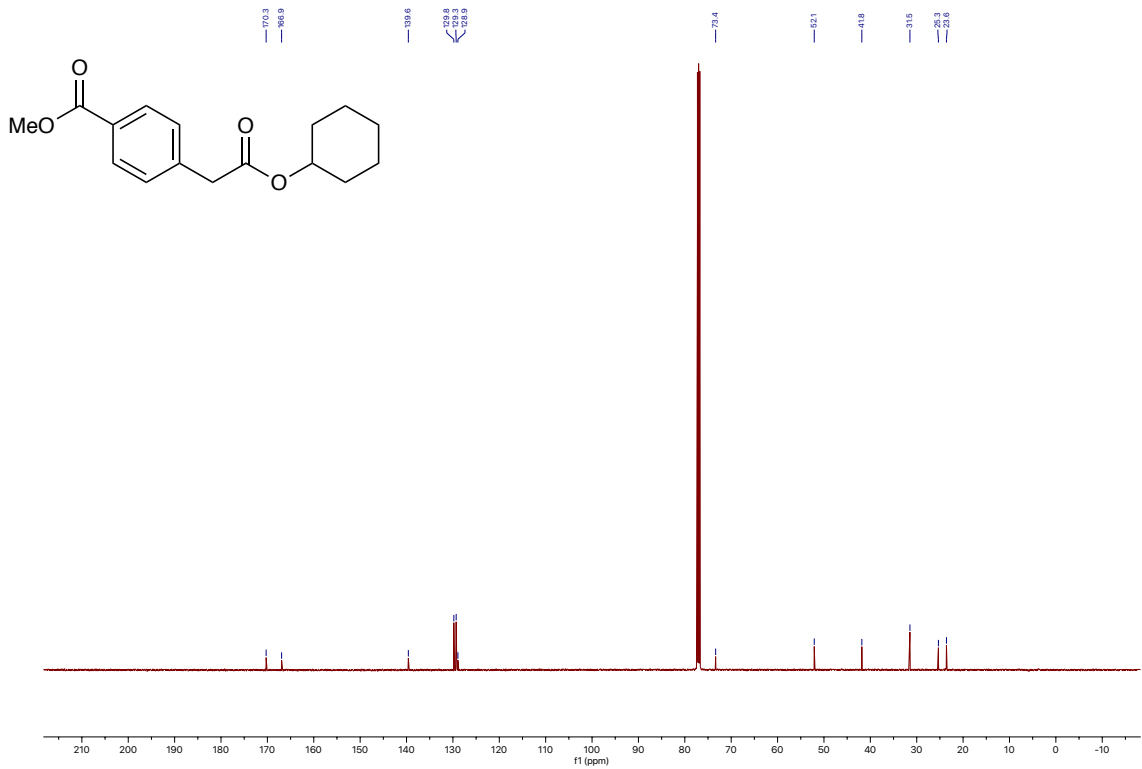

Supporting Information

$^1\text{H}$  NMR of **4v**

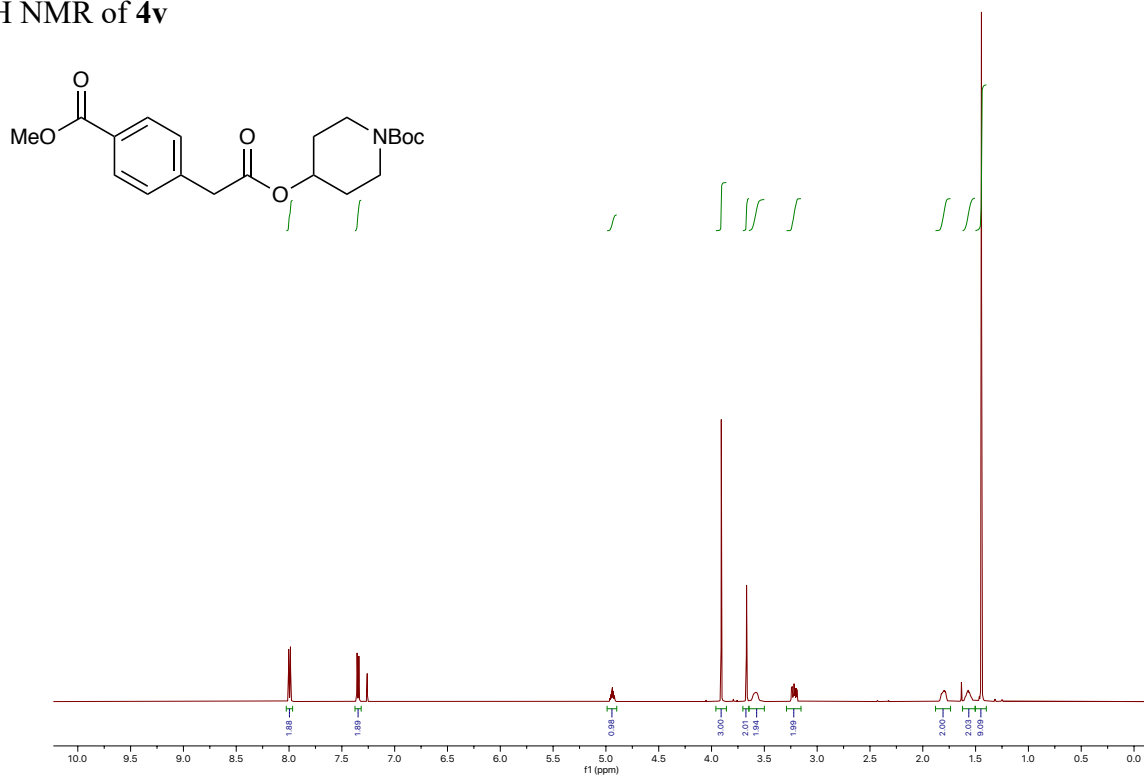

$^{13}\text{C}$  NMR of **4v**

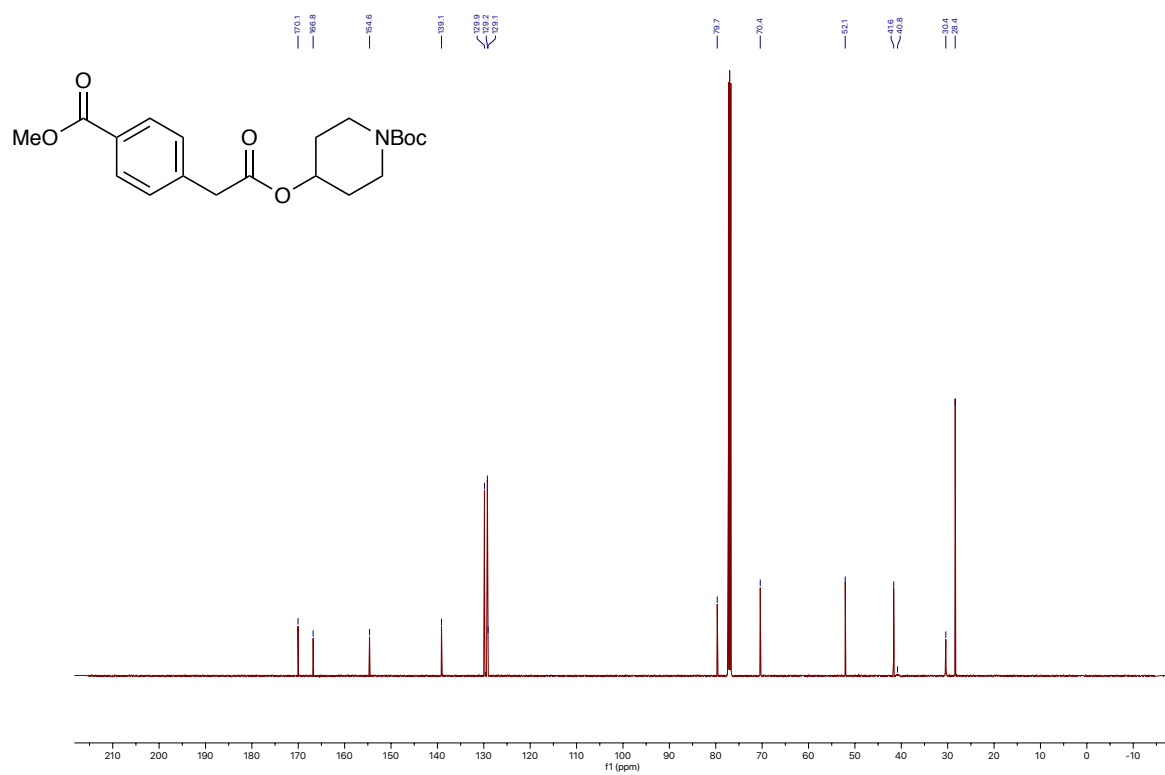

## Supporting Information

### $^1\text{H}$ NMR of **4w**

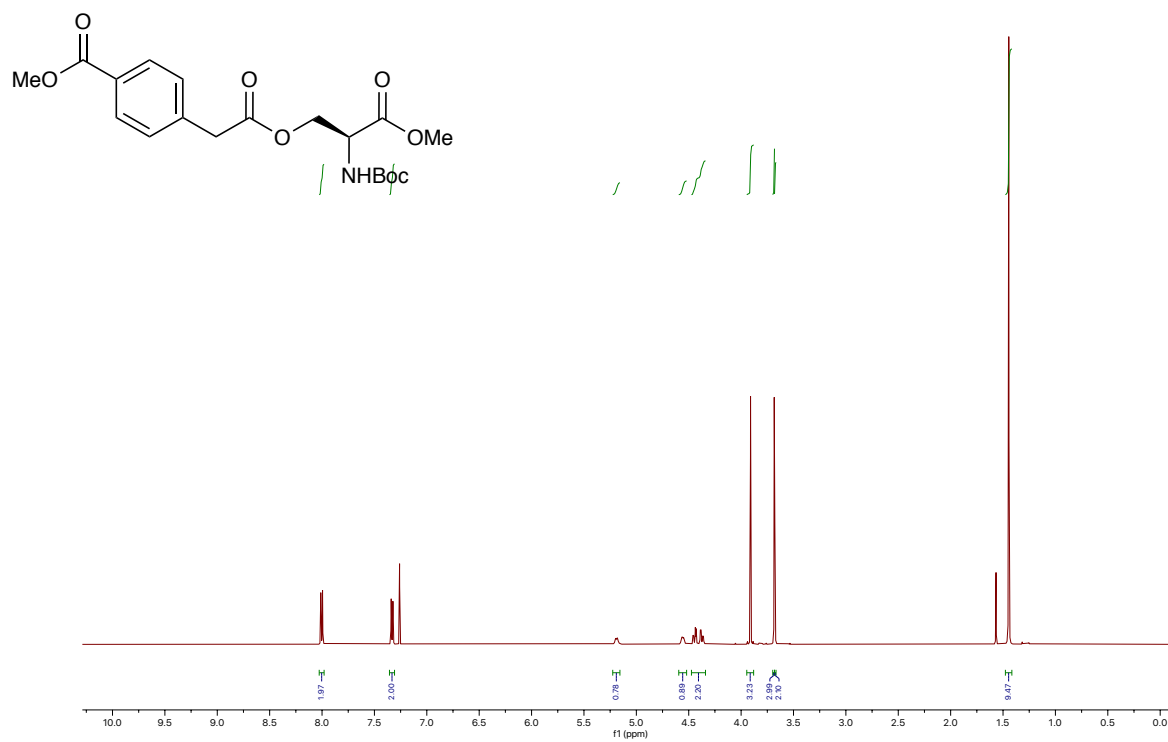

### $^{13}\text{C}$ NMR of **4w**

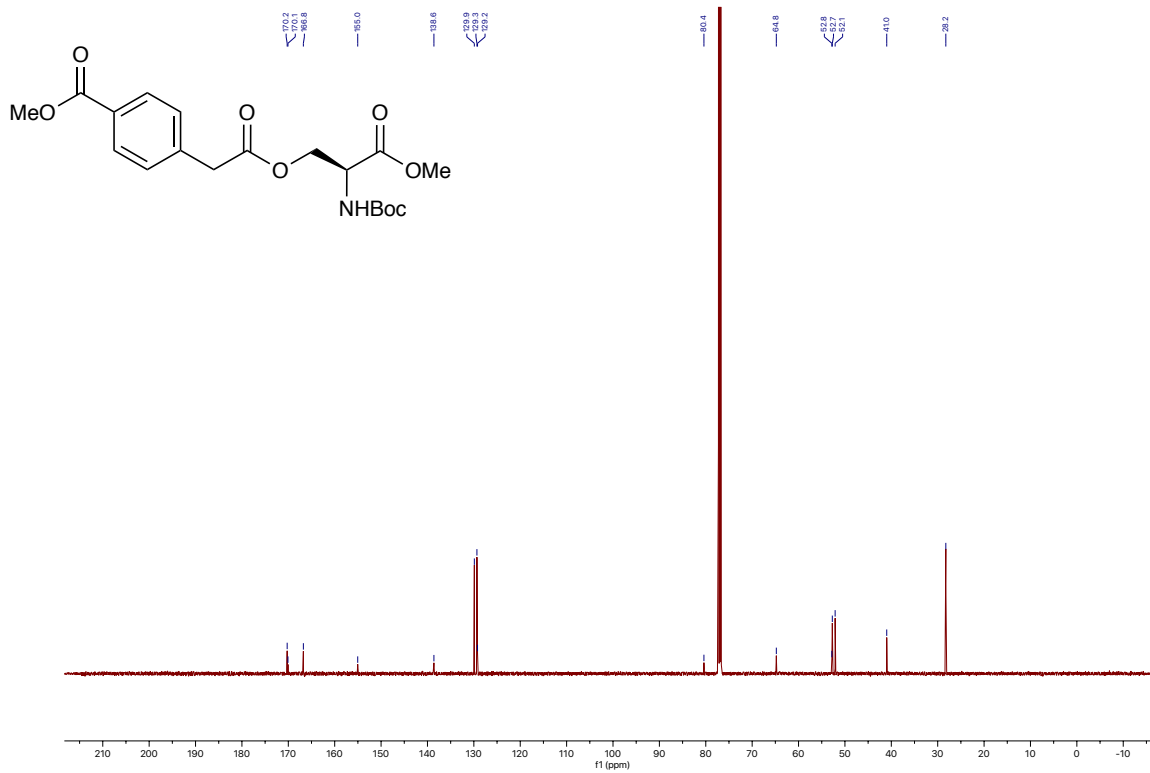

Supporting Information

$^1\text{H}$  NMR of **4y**

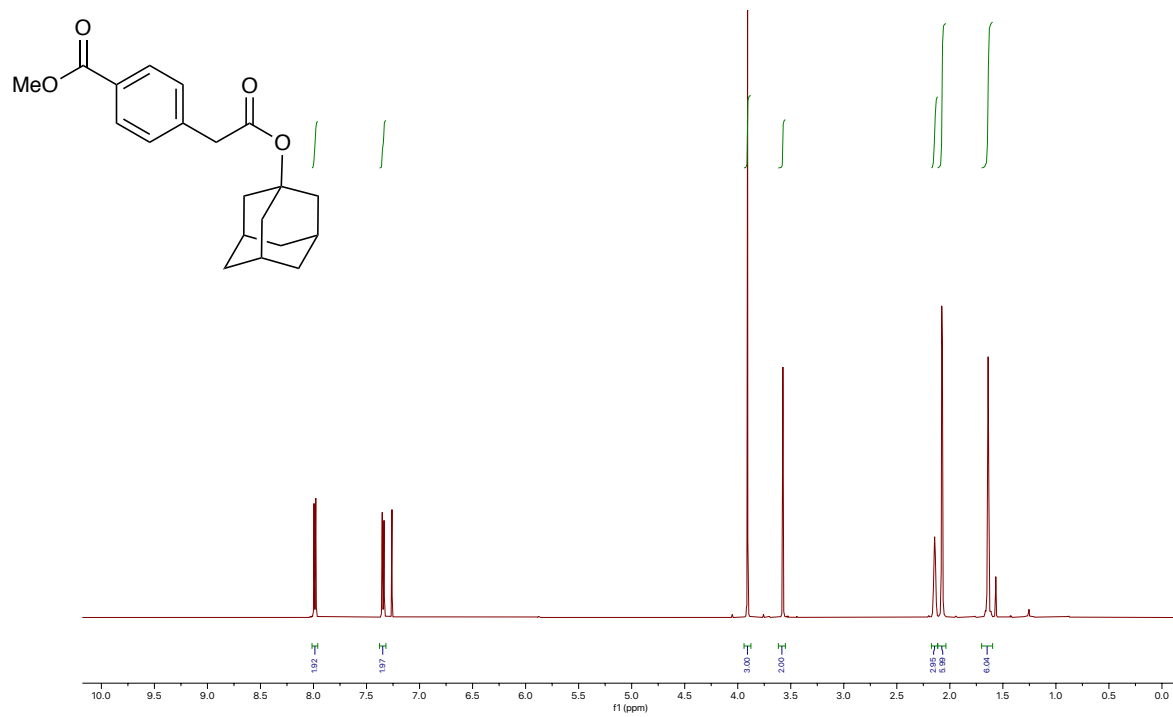

$^{13}\text{C}$  NMR of **4y**

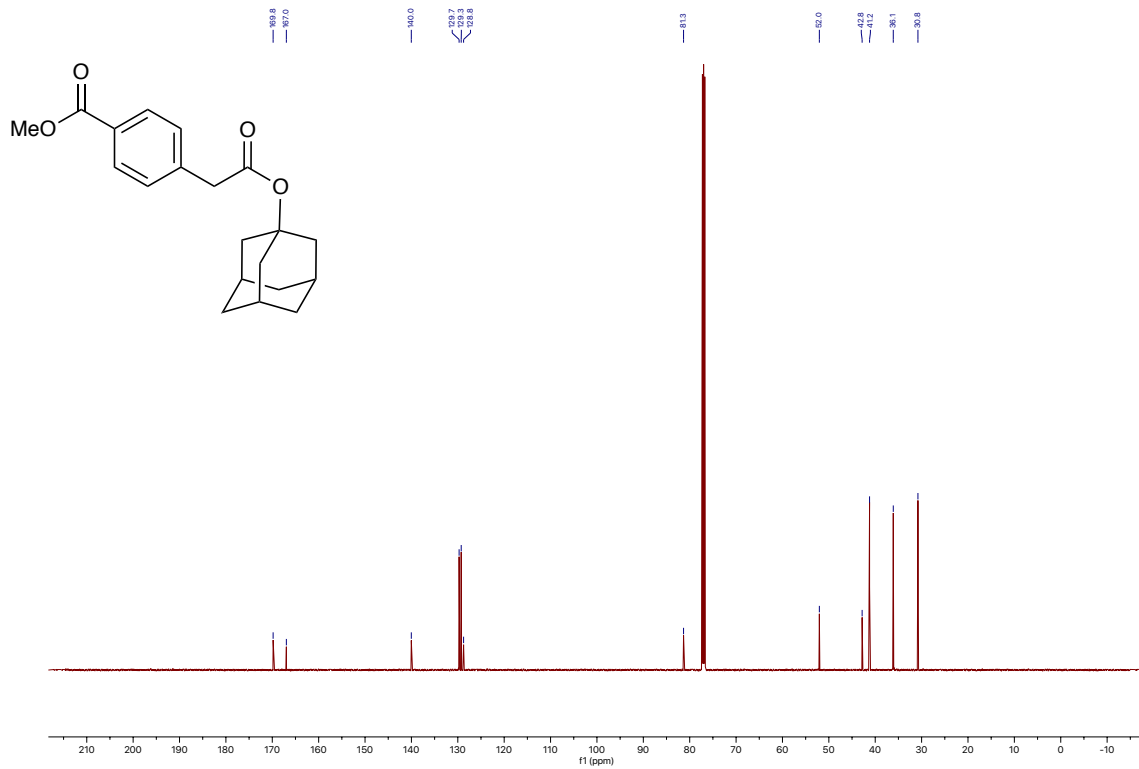

Supporting Information

$^1\text{H}$  NMR of **4z**

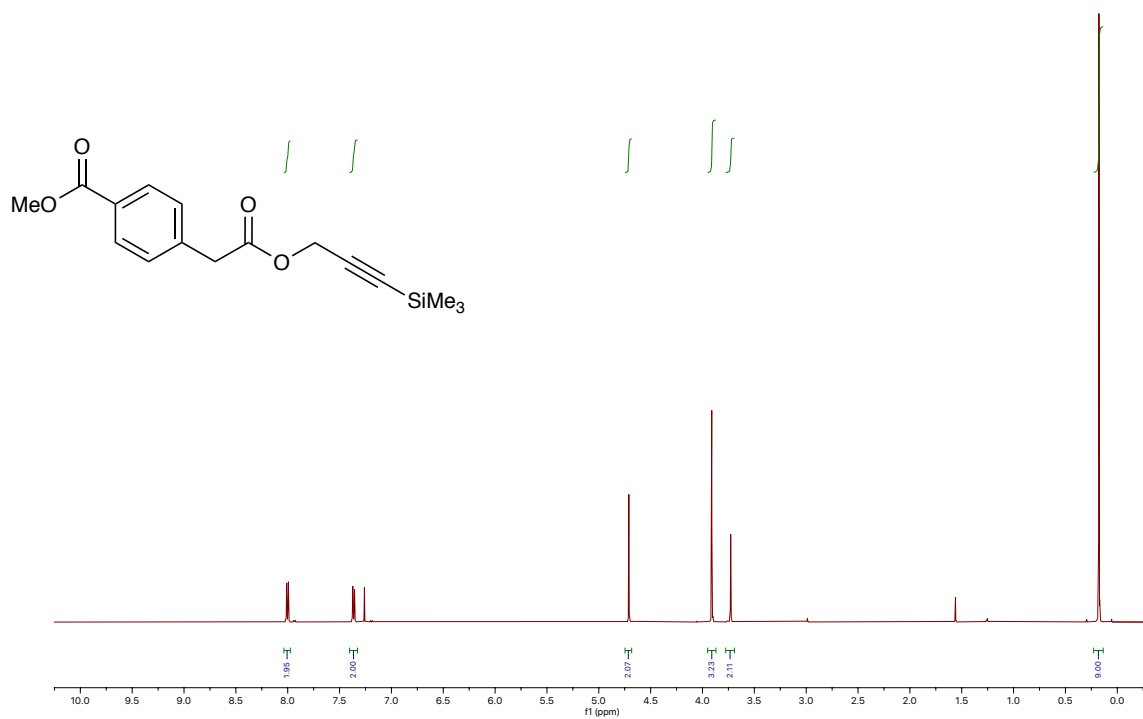

$^{13}\text{C}$  NMR of **4z**

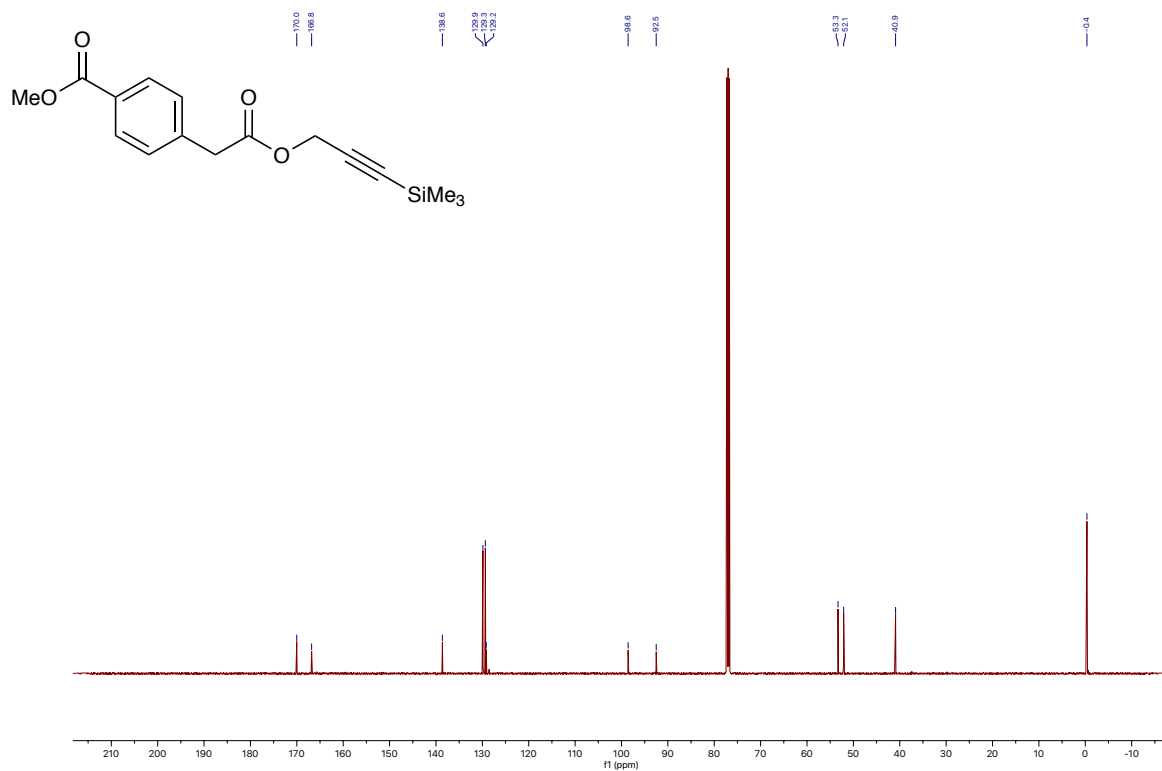



Supporting Information

$^1\text{H}$  NMR of **4aa**

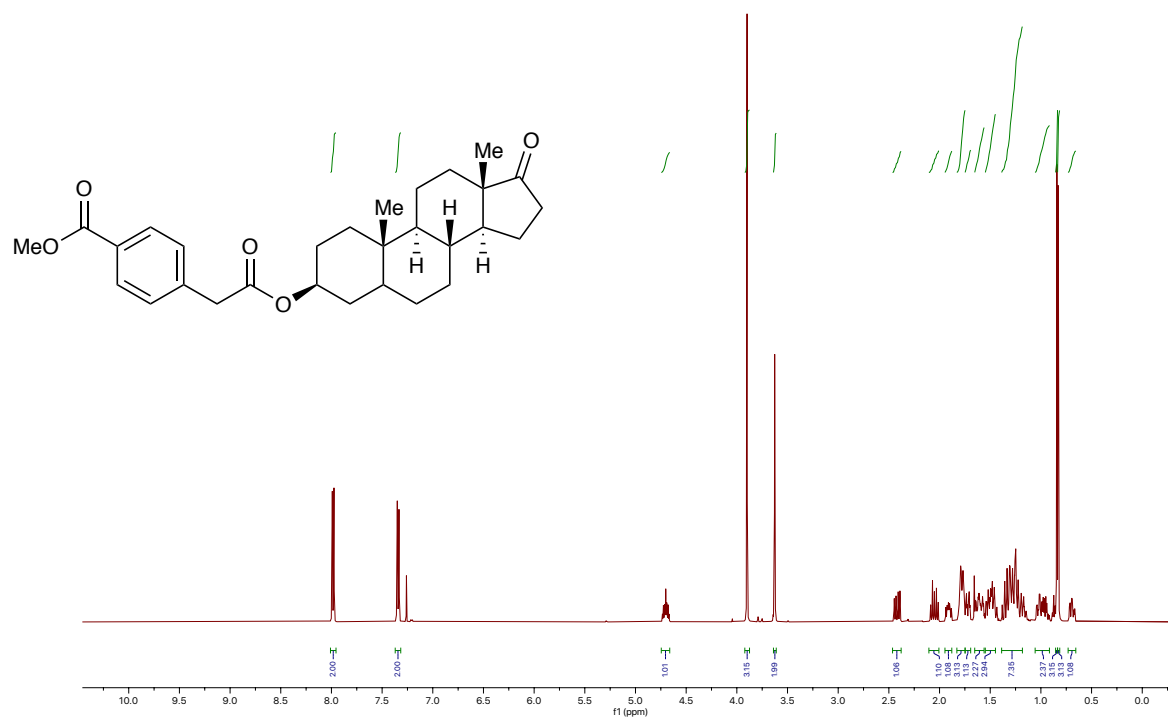

$^{13}\text{C}$  NMR of **4aa**

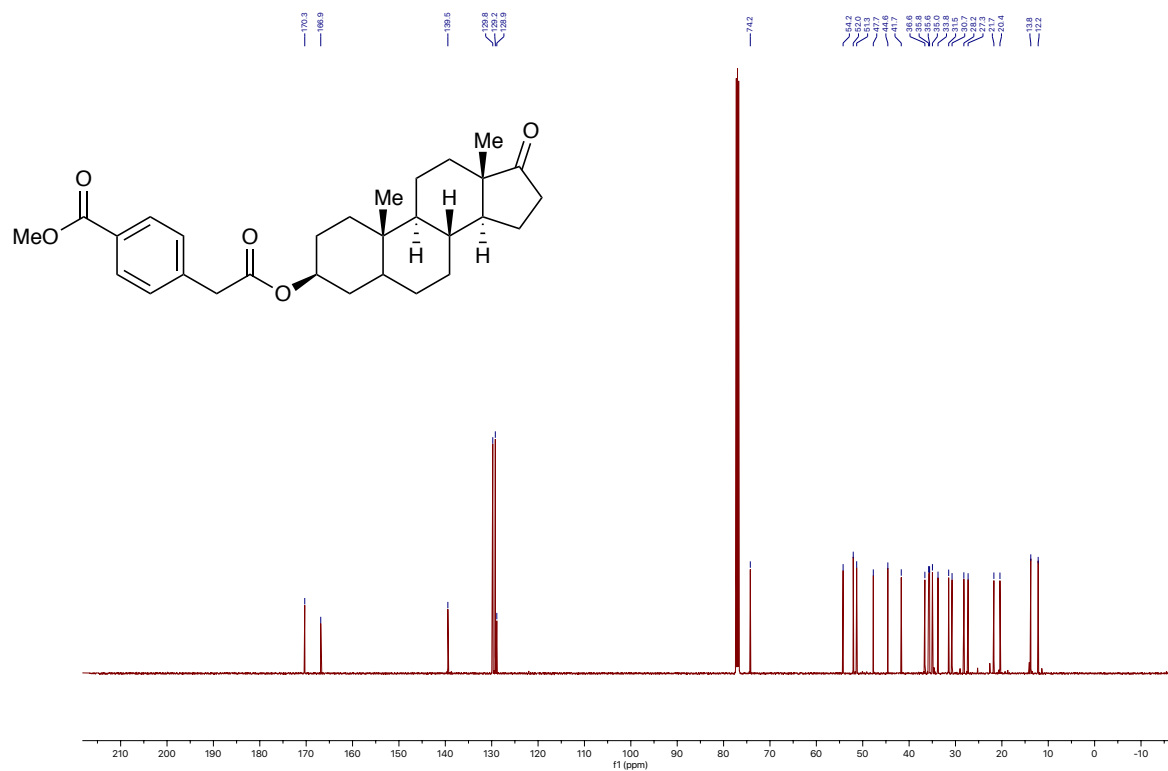

Supporting Information

$^1\text{H}$  NMR of **4ab**

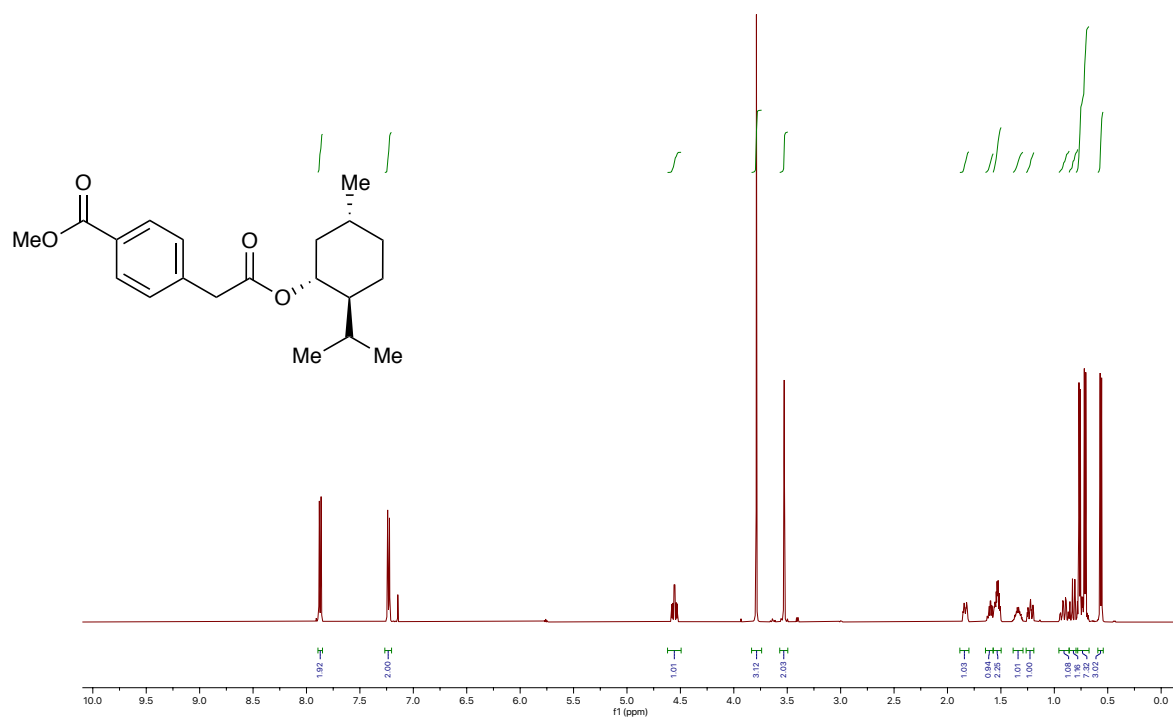

$^{13}\text{C}$  NMR of **4ab**

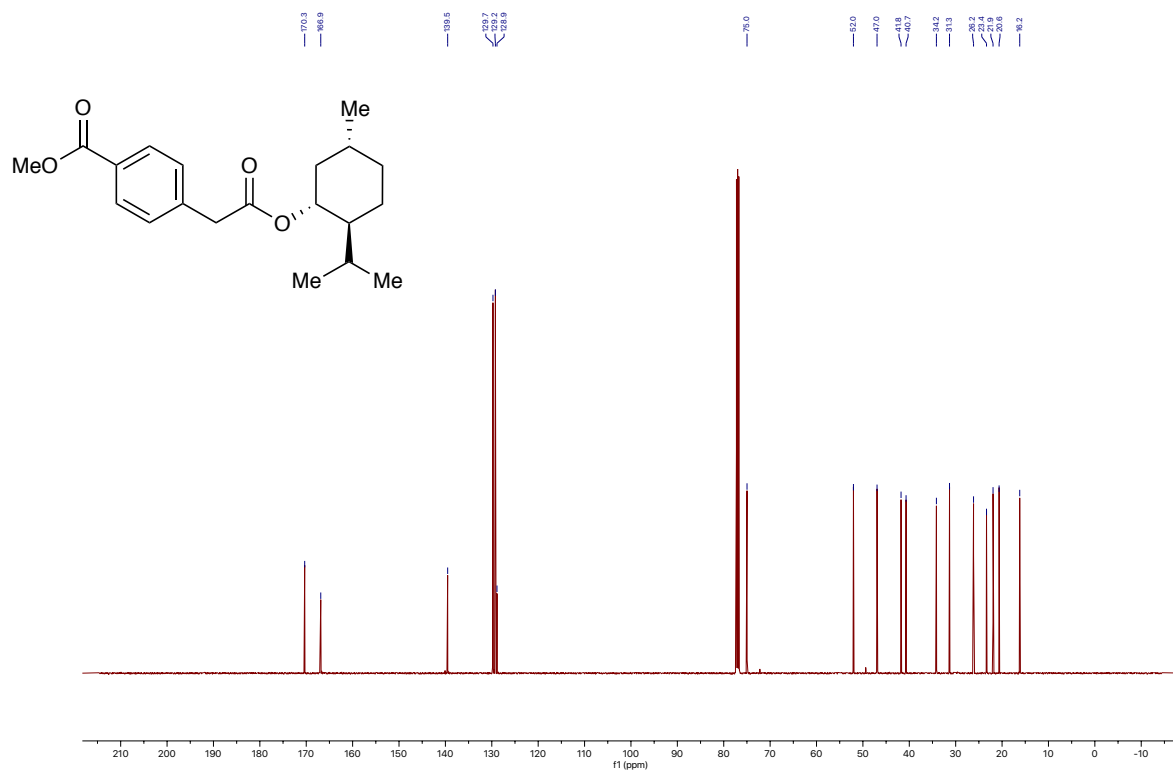

Supplement: NIHMS1715599-supplement-1.pdf [file NIHMS1715599-supplement-1.pdf]
